# Supplementary material for: Isolated cationic crown ether complexes of gallium(i) and indium(i)
Source: Royal Society of Chemistry journal article supplement (doi:10.1039/c2dt30379e), 2012-01-01
Supplement: c2dt30379e.pdf [file c2dt30379e.pdf]

# **Isolated Cationic Crown Ether Complexes of Gallium(I) and Indium(I)**

**Electronic supplementary information**

**Alexander Higelin, Christoph Haber, Stefan Meier and  
Ingo Krossing\***

Prof. Dr. Ingo Krossing  
Albert-Ludwigs-Universität Freiburg  
Institut für Anorganische und Analytische Chemie,  
Freiburger Materialforschungszentrum FMF  
and Freiburg Institute for Advanced Studies FRIAS,  
Section Soft Matter Science  
Albertstr. 21  
79104 Freiburg (Germany)  
E-mail: [krossing@uni-freiburg.de](mailto:krossing@uni-freiburg.de)

## Table of Contents

|        |                                                                                                                               |    |
|--------|-------------------------------------------------------------------------------------------------------------------------------|----|
| 1.     | Quantum-chemical Data .....                                                                                                   | 3  |
| 1.1.   | Summary of the quantum chemical calculations:.....                                                                            | 3  |
| 1.2.   | Fluorobenzene.....                                                                                                            | 3  |
| 1.3.   | [18]crown-6 ether .....                                                                                                       | 5  |
| 1.4.   | $\text{Ga}(\text{C}_6\text{H}_5\text{F})_2^+$ .....                                                                           | 12 |
| 1.5.   | $\text{In}(\text{C}_6\text{H}_5\text{F})_2^+$ .....                                                                           | 15 |
| 1.6.   | $\text{Ga}([\text{18}]\text{crown-6})^+$ .....                                                                                | 19 |
| 1.7.   | $\text{In}([\text{18}]\text{crown-6})^+$ .....                                                                                | 26 |
| 1.8.   | $\text{Ga}([\text{18}]\text{crown-6})(\text{PhF})_2^+$ .....                                                                  | 33 |
| 2.     | Crystal Structure Data .....                                                                                                  | 35 |
| 2.1.   | $[\text{Ga}([\text{18}]\text{crown-6})(\text{PhF})_2]_4[\text{Al}(\text{OC}(\text{CF}_3)_3)_4]_4 \bullet \text{PhF}$ (1)..... | 36 |
| 2.1.1. | Crystal data and structure refinement for CCDC 864619 .....                                                                   | 37 |
| 2.1.2. | Fractional Atomic Coordinates and Equivalent Isotropic Displacement Parameters ...                                            | 37 |
| 2.1.3. | Anisotropic Displacement Parameters.....                                                                                      | 45 |
| 2.1.4. | Bond Lengths.....                                                                                                             | 52 |
| 2.1.5. | Bond Angles.....                                                                                                              | 56 |
| 2.1.6. | Hydrogen Atom Coordinates and Isotropic Displacement Parameters .....                                                         | 62 |
| 2.2.   | $[\text{In}([\text{18}]\text{crown-6})(\text{PhF})_2]_4[\text{Al}(\text{OC}(\text{CF}_3)_3)_4]_4 \bullet \text{PhF}$ (2)..... | 66 |
| 2.2.1. | Crystal data and structure refinement of CCDC 861241 .....                                                                    | 67 |
| 2.2.2. | Fractional Atomic Coordinates and Equivalent Isotropic Displacement Parameters ...                                            | 67 |
| 2.2.3. | Anisotropic Displacement Parameters.....                                                                                      | 74 |
| 2.2.4. | Bond Lengths.....                                                                                                             | 82 |
| 2.2.5. | Bond Angles.....                                                                                                              | 85 |
| 2.2.6. | Hydrogen Atom Coordinates and Isotropic Displacement Parameters .....                                                         | 91 |

## 1. Quantum-chemical Data

### 1.1. Summary of the quantum chemical calculations:

(all values are given in hartrees)

|                                                               | BP86/SV(P)       |                  | B3LYP/def2-TZVPP |                  |
|---------------------------------------------------------------|------------------|------------------|------------------|------------------|
|                                                               | E <sub>SCF</sub> | E <sub>vib</sub> | E <sub>SCF</sub> | E <sub>vib</sub> |
| C <sub>6</sub> H <sub>5</sub> F                               | -331.2468254861  | 0.0899754        | -331.4366174934  | 0.0921416        |
| [18]crown-6                                                   | -922.2902973818  | 0.3579634        | -921.7179252771  | 0.3696215        |
| Ga(C <sub>6</sub> H <sub>5</sub> F) <sub>2</sub> <sup>+</sup> | -2587.180000953  | 0.1817305        | -2587.452007032  | 0.1863278        |
| In(C <sub>6</sub> H <sub>5</sub> F) <sub>2</sub> <sup>+</sup> | -664.2152353733  | 0.1816597        | -852.8230095832  | 0.1861753        |
| Ga([18]crown-6) <sup>+</sup>                                  | -2847.049937786  | 0.3598534        | -2847.476032561  | 0.3690519        |
| In([18]crown-6) <sup>+</sup>                                  | -924.0891462864  | 0.3598441        | -1112.845322211  |                  |

### 1.2. Fluorobenzene

Optimized atomic coordinates from the DFT (BP86/SV(P)) calculations (Bohr Units):

|                   |                   |                    |   |
|-------------------|-------------------|--------------------|---|
| 1.36139080546022  | 2.27246909180221  | 0.0000000000000000 | C |
| -1.28730257706180 | 2.23049810184745  | 0.0000000000000000 | C |
| 2.67471686252994  | -0.03565663632939 | 0.0000000000000000 | C |
| -2.64759748495706 | -0.04236067117896 | 0.0000000000000000 | C |
| 1.35082383061929  | -2.34002939349849 | 0.0000000000000000 | C |
| -1.30674391785547 | -2.33410653791926 | 0.0000000000000000 | C |
| 2.35493041129814  | 4.10113475177969  | 0.0000000000000000 | H |
| -2.56501321153211 | 4.43674255753021  | 0.0000000000000000 | F |
| 4.75820839919794  | -0.02653944675203 | 0.0000000000000000 | H |
| -4.72774879052731 | 0.01444660646626  | 0.0000000000000000 | H |
| 2.39207326137873  | -4.14344734808886 | 0.0000000000000000 | H |
| -2.35773758855049 | -4.13315107565886 | 0.0000000000000000 | H |

List of calculated frequencies (BP86/SV(P)):

| mode | symmetry | wave number<br>cm <sup>**(-1)</sup> | IR intensity<br>km/mol | IR  | selection rules<br>RAMAN |
|------|----------|-------------------------------------|------------------------|-----|--------------------------|
| 1    |          | 0.00                                | 0.00000                | -   | -                        |
| 2    |          | 0.00                                | 0.00000                | -   | -                        |
| 3    |          | 0.00                                | 0.00000                | -   | -                        |
| 4    |          | 0.00                                | 0.00000                | -   | -                        |
| 5    |          | 0.00                                | 0.00000                | -   | -                        |
| 6    |          | 0.00                                | 0.00000                | -   | -                        |
| 7    | a''      | 234.29                              | 0.03373                | YES | YES                      |
| 8    | a'       | 399.20                              | 1.70770                | YES | YES                      |
| 9    | a''      | 412.85                              | 0.00011                | YES | YES                      |
| 10   | a''      | 500.90                              | 7.65925                | YES | YES                      |
| 11   | a'       | 509.35                              | 3.65119                | YES | YES                      |
| 12   | a'       | 605.85                              | 0.12545                | YES | YES                      |
| 13   | a''      | 682.06                              | 16.63510               | YES | YES                      |

|    |     |         |          |     |     |
|----|-----|---------|----------|-----|-----|
| 14 | a'' | 747.79  | 56.87969 | YES | YES |
| 15 | a'' | 807.32  | 0.00024  | YES | YES |
| 16 | a'  | 808.11  | 19.99457 | YES | YES |
| 17 | a'' | 884.40  | 7.60111  | YES | YES |
| 18 | a'' | 943.52  | 0.00046  | YES | YES |
| 19 | a'' | 969.12  | 0.17721  | YES | YES |
| 20 | a'  | 987.54  | 0.12498  | YES | YES |
| 21 | a'  | 1015.49 | 3.19233  | YES | YES |
| 22 | a'  | 1059.76 | 8.61591  | YES | YES |
| 23 | a'  | 1135.87 | 6.85271  | YES | YES |
| 24 | a'  | 1137.59 | 0.13099  | YES | YES |
| 25 | a'  | 1247.45 | 83.12963 | YES | YES |
| 26 | a'  | 1283.36 | 0.47471  | YES | YES |
| 27 | a'  | 1375.22 | 0.17022  | YES | YES |
| 28 | a'  | 1450.35 | 0.60525  | YES | YES |
| 29 | a'  | 1494.35 | 81.28575 | YES | YES |
| 30 | a'  | 1613.50 | 9.67932  | YES | YES |
| 31 | a'  | 1618.79 | 50.66334 | YES | YES |
| 32 | a'  | 3095.76 | 0.26766  | YES | YES |
| 33 | a'  | 3104.32 | 9.20949  | YES | YES |
| 34 | a'  | 3116.60 | 16.95441 | YES | YES |
| 35 | a'  | 3126.03 | 5.39480  | YES | YES |
| 36 | a'  | 3127.88 | 0.13977  | YES | YES |

*Optimized atomic coordinates from the DFT (B3LYP/TZVPP) calculations (Bohr Units):*

|                   |                   |                    |   |
|-------------------|-------------------|--------------------|---|
| 1.34891272142885  | 2.24901509406438  | 0.0000000000000000 | c |
| -1.26612382354869 | 2.19374048938239  | 0.0000000000000000 | c |
| 2.64807902096738  | -0.03663469255952 | 0.0000000000000000 | c |
| -2.62135496338878 | -0.04330323291186 | 0.0000000000000000 | c |
| 1.33657386628921  | -2.31539034733319 | 0.0000000000000000 | c |
| -1.29267231547853 | -2.31163056676294 | 0.0000000000000000 | c |
| 2.32580853650981  | 4.04329113564889  | 0.0000000000000000 | h |
| -2.54514761027895 | 4.40482899998468  | 0.0000000000000000 | f |
| 4.69265372380221  | -0.02987351914260 | 0.0000000000000000 | h |
| -4.66351135988107 | 0.00979493295404  | 0.0000000000000000 | h |
| 2.35855189743209  | -4.08539782057987 | 0.0000000000000000 | h |
| -2.32176969385355 | -4.07844047274443 | 0.0000000000000000 | h |

*List of calculated frequencies (B3LYP/TZVPP):*

| # mode | symmetry | wave number | IR intensity | selection rules |       |
|--------|----------|-------------|--------------|-----------------|-------|
| #      |          | cm**(-1)    | km/mol       | IR              | RAMAN |
| 1      |          | 0.00        | 0.00000      | -               | -     |
| 2      |          | 0.00        | 0.00000      | -               | -     |
| 3      |          | 0.00        | 0.00000      | -               | -     |
| 4      |          | 0.00        | 0.00000      | -               | -     |
| 5      |          | 0.00        | 0.00000      | -               | -     |
| 6      |          | 0.00        | 0.00000      | -               | -     |
| 7      | a''      | 238.93      | 0.06176      | YES             | YES   |
| 8      | a'       | 406.52      | 1.96582      | YES             | YES   |
| 9      | a''      | 424.94      | 0.00005      | YES             | YES   |

|    |     |         |           |     |     |
|----|-----|---------|-----------|-----|-----|
| 10 | a'' | 512.16  | 10.44414  | YES | YES |
| 11 | a'  | 526.34  | 5.41804   | YES | YES |
| 12 | a'  | 629.06  | 0.18756   | YES | YES |
| 13 | a'' | 697.78  | 18.17457  | YES | YES |
| 14 | a'' | 770.59  | 70.05373  | YES | YES |
| 15 | a'  | 825.15  | 26.41801  | YES | YES |
| 16 | a'' | 836.87  | 0.00011   | YES | YES |
| 17 | a'' | 915.73  | 7.48859   | YES | YES |
| 18 | a'' | 979.19  | 0.00026   | YES | YES |
| 19 | a'' | 993.12  | 0.02928   | YES | YES |
| 20 | a'  | 1023.26 | 0.23169   | YES | YES |
| 21 | a'  | 1041.04 | 3.73447   | YES | YES |
| 22 | a'  | 1091.85 | 7.03309   | YES | YES |
| 23 | a'  | 1177.95 | 13.24004  | YES | YES |
| 24 | a'  | 1180.65 | 0.24210   | YES | YES |
| 25 | a'  | 1248.34 | 102.18213 | YES | YES |
| 26 | a'  | 1326.49 | 0.27367   | YES | YES |
| 27 | a'  | 1347.61 | 0.48805   | YES | YES |
| 28 | a'  | 1491.96 | 1.21664   | YES | YES |
| 29 | a'  | 1529.52 | 77.84539  | YES | YES |
| 30 | a'  | 1636.52 | 48.03987  | YES | YES |
| 31 | a'  | 1643.40 | 9.16900   | YES | YES |
| 32 | a'  | 3171.97 | 0.10580   | YES | YES |
| 33 | a'  | 3180.79 | 8.47061   | YES | YES |
| 34 | a'  | 3192.67 | 15.83117  | YES | YES |
| 35 | a'  | 3201.44 | 5.03671   | YES | YES |
| 36 | a'  | 3203.60 | 0.27007   | YES | YES |

### 1.3.[18]crown-6 ether

*Optimized atomic coordinates from the DFT (BP86/SV(P)) calculations (Bohr Units):*

|                   |                   |                   |   |
|-------------------|-------------------|-------------------|---|
| -6.26950248544884 | 0.86624585292064  | 0.30878970339939  | c |
| -6.64971094660926 | 2.91880869812319  | 1.99942154294734  | o |
| -4.62348493109295 | 4.61114529255000  | 2.42043023708800  | c |
| -3.71156241752441 | 6.09434114368993  | 0.09274127660432  | c |
| -2.10072689823947 | 4.71149141772246  | -1.55768343913436 | o |
| 0.48009940286282  | 4.72980392463661  | -0.84464898640626 | c |
| 1.88577172360356  | 2.87389345607649  | -2.54577543375388 | c |
| 4.47199374135619  | 2.91165182244835  | -1.81495019947330 | o |
| 6.04916652404824  | 1.21601458716156  | -3.14663622883675 | c |
| 5.82192977820737  | -1.54838691615863 | -2.32286981498192 | c |
| 3.58340626680267  | -2.60214743121371 | -3.34626451018610 | o |
| 3.09631784293247  | -5.15619243250002 | -2.73979433816795 | c |
| 2.55020202165807  | -5.69187583294799 | 0.05368073831888  | c |
| 0.66246431917625  | -4.02574803692820 | 0.92551588348127  | o |
| -0.22287472127408 | -4.57697963703803 | 3.39225273544356  | c |
| -1.74666828965933 | -2.34930799610661 | 4.42649973449229  | c |
| -4.09142207752732 | -1.89983257700581 | 3.24848263102890  | o |
| -3.96320683464899 | -0.79248125787073 | 0.80189104076257  | c |
| -6.13383691830456 | 1.52763205151261  | -1.69519853233766 | h |

---

|                   |                   |                   |   |
|-------------------|-------------------|-------------------|---|
| -8.01368858882626 | -0.29146535517934 | 0.48932845900623  | h |
| -2.97988282263418 | 3.64898690376952  | 3.34292160277854  | h |
| -5.37479325760959 | 5.99139248597881  | 3.81867315575616  | h |
| -5.39011834575377 | 6.65786597107458  | -1.04287569718508 | h |
| -2.74665757471015 | 7.86613961631486  | 0.73467391895244  | h |
| 1.30278443110376  | 6.67177888830975  | -1.04112912466316 | h |
| 0.75273867429166  | 4.13719953647470  | 1.16700925521720  | h |
| 1.66601480157402  | 3.44941073495936  | -4.57066995312830 | h |
| 1.06588876804427  | 0.94831604433701  | -2.33624174627122 | h |
| 8.01788374650409  | 1.84819760205278  | -2.76532173537982 | h |
| 5.71109595675944  | 1.33631664289560  | -5.23283000576841 | h |
| 5.82440176138105  | -1.61071256964237 | -0.21175945352576 | h |
| 7.52210936205013  | -2.62122638732016 | -3.00637477768495 | h |
| 4.70126924566109  | -6.40539052183775 | -3.34336695237832 | h |
| 1.40807912297498  | -5.67178641830319 | -3.87717638576007 | h |
| 4.30137966709301  | -5.49850702502949 | 1.23263096279999  | h |
| 1.94047573039363  | -7.71683393674935 | 0.21000088591440  | h |
| 1.40650560662952  | -4.92545806658521 | 4.70501290651165  | h |
| -1.41662483471744 | -6.32636806801331 | 3.38139450394472  | h |
| -2.17808950586860 | -2.74902239422303 | 6.44649662449173  | h |
| -0.52226808481944 | -0.62109358912244 | 4.35207421332770  | h |
| -2.20040974538892 | 0.33610137968016  | 0.59495580524367  | h |
| -3.88644921445109 | -2.27191760291401 | -0.70331050248821 | h |

---

*List of calculated frequencies (BP86/SV(P)):*

---

| # mode | symmetry | wave number | IR intensity | selection rules |       |
|--------|----------|-------------|--------------|-----------------|-------|
| #      |          | cm**(-1)    | km/mol       | IR              | RAMAN |
| 1      |          | 0.00        | 0.00000      | -               | -     |
| 2      |          | 0.00        | 0.00000      | -               | -     |
| 3      |          | 0.00        | 0.00000      | -               | -     |
| 4      |          | 0.00        | 0.00000      | -               | -     |
| 5      |          | 0.00        | 0.00000      | -               | -     |
| 6      |          | 0.00        | 0.00000      | -               | -     |
| 7      | a        | 34.54       | 0.34198      | YES             | YES   |
| 8      | a        | 42.03       | 0.09582      | YES             | YES   |
| 9      | a        | 49.76       | 0.52077      | YES             | YES   |
| 10     | a        | 67.51       | 0.83788      | YES             | YES   |
| 11     | a        | 75.89       | 1.12223      | YES             | YES   |
| 12     | a        | 81.86       | 0.49931      | YES             | YES   |
| 13     | a        | 96.75       | 2.22959      | YES             | YES   |
| 14     | a        | 112.10      | 3.61223      | YES             | YES   |
| 15     | a        | 123.74      | 4.93874      | YES             | YES   |
| 16     | a        | 149.99      | 1.88105      | YES             | YES   |
| 17     | a        | 162.95      | 5.01268      | YES             | YES   |
| 18     | a        | 174.93      | 8.80121      | YES             | YES   |
| 19     | a        | 176.71      | 2.84479      | YES             | YES   |
| 20     | a        | 207.61      | 1.86576      | YES             | YES   |
| 21     | a        | 238.27      | 6.60101      | YES             | YES   |
| 22     | a        | 261.71      | 4.04602      | YES             | YES   |
| 23     | a        | 274.11      | 1.47660      | YES             | YES   |
| 24     | a        | 298.56      | 2.32595      | YES             | YES   |

---

---

|    |   |         |           |     |     |
|----|---|---------|-----------|-----|-----|
| 25 | a | 306.91  | 0.13757   | YES | YES |
| 26 | a | 348.50  | 3.41290   | YES | YES |
| 27 | a | 357.36  | 1.07557   | YES | YES |
| 28 | a | 362.25  | 0.97076   | YES | YES |
| 29 | a | 383.25  | 2.41355   | YES | YES |
| 30 | a | 411.07  | 0.07676   | YES | YES |
| 31 | a | 472.17  | 0.98854   | YES | YES |
| 32 | a | 497.24  | 15.97549  | YES | YES |
| 33 | a | 513.37  | 2.35206   | YES | YES |
| 34 | a | 519.55  | 5.72072   | YES | YES |
| 35 | a | 570.30  | 8.93985   | YES | YES |
| 36 | a | 580.17  | 10.74387  | YES | YES |
| 37 | a | 782.18  | 5.97870   | YES | YES |
| 38 | a | 793.21  | 0.42214   | YES | YES |
| 39 | a | 808.90  | 2.79263   | YES | YES |
| 40 | a | 813.74  | 7.51873   | YES | YES |
| 41 | a | 828.47  | 12.87138  | YES | YES |
| 42 | a | 859.33  | 25.62243  | YES | YES |
| 43 | a | 872.50  | 7.92006   | YES | YES |
| 44 | a | 892.93  | 11.65044  | YES | YES |
| 45 | a | 901.29  | 19.62515  | YES | YES |
| 46 | a | 920.84  | 28.63128  | YES | YES |
| 47 | a | 934.45  | 36.91442  | YES | YES |
| 48 | a | 989.61  | 45.50145  | YES | YES |
| 49 | a | 998.53  | 1.39806   | YES | YES |
| 50 | a | 1016.48 | 17.49877  | YES | YES |
| 51 | a | 1031.23 | 23.00334  | YES | YES |
| 52 | a | 1040.89 | 17.37027  | YES | YES |
| 53 | a | 1055.34 | 32.84177  | YES | YES |
| 54 | a | 1057.59 | 20.14842  | YES | YES |
| 55 | a | 1082.48 | 1.51550   | YES | YES |
| 56 | a | 1088.11 | 26.31246  | YES | YES |
| 57 | a | 1100.31 | 7.81868   | YES | YES |
| 58 | a | 1117.09 | 11.95382  | YES | YES |
| 59 | a | 1117.46 | 45.31711  | YES | YES |
| 60 | a | 1127.49 | 2.80856   | YES | YES |
| 61 | a | 1130.88 | 137.83971 | YES | YES |
| 62 | a | 1139.26 | 43.88292  | YES | YES |
| 63 | a | 1154.82 | 192.81568 | YES | YES |
| 64 | a | 1156.07 | 247.29901 | YES | YES |
| 65 | a | 1159.70 | 78.94670  | YES | YES |
| 66 | a | 1174.82 | 97.64256  | YES | YES |
| 67 | a | 1197.25 | 8.86761   | YES | YES |
| 68 | a | 1225.96 | 23.04408  | YES | YES |
| 69 | a | 1229.55 | 2.60312   | YES | YES |
| 70 | a | 1238.51 | 8.74697   | YES | YES |
| 71 | a | 1246.19 | 30.84934  | YES | YES |
| 72 | a | 1247.80 | 43.15672  | YES | YES |
| 73 | a | 1257.69 | 26.02519  | YES | YES |
| 74 | a | 1272.22 | 4.54934   | YES | YES |
| 75 | a | 1280.96 | 28.64111  | YES | YES |
| 76 | a | 1290.35 | 27.41823  | YES | YES |
| 77 | a | 1298.99 | 34.60730  | YES | YES |

---

---

|     |   |         |           |     |     |
|-----|---|---------|-----------|-----|-----|
| 78  | a | 1303.29 | 7.72116   | YES | YES |
| 79  | a | 1328.10 | 6.82133   | YES | YES |
| 80  | a | 1336.11 | 46.42053  | YES | YES |
| 81  | a | 1344.26 | 18.72455  | YES | YES |
| 82  | a | 1354.25 | 23.43831  | YES | YES |
| 83  | a | 1357.56 | 13.47612  | YES | YES |
| 84  | a | 1368.07 | 20.90548  | YES | YES |
| 85  | a | 1374.71 | 6.70172   | YES | YES |
| 86  | a | 1377.34 | 6.08614   | YES | YES |
| 87  | a | 1383.09 | 4.89355   | YES | YES |
| 88  | a | 1385.69 | 9.49288   | YES | YES |
| 89  | a | 1397.76 | 3.53014   | YES | YES |
| 90  | a | 1404.14 | 2.78370   | YES | YES |
| 91  | a | 1412.11 | 12.14339  | YES | YES |
| 92  | a | 1419.04 | 1.47795   | YES | YES |
| 93  | a | 1420.38 | 6.82785   | YES | YES |
| 94  | a | 1422.19 | 3.68634   | YES | YES |
| 95  | a | 1427.08 | 5.66506   | YES | YES |
| 96  | a | 1431.07 | 7.77009   | YES | YES |
| 97  | a | 1440.51 | 13.92669  | YES | YES |
| 98  | a | 1451.37 | 4.76367   | YES | YES |
| 99  | a | 1456.53 | 14.11985  | YES | YES |
| 100 | a | 1470.26 | 1.80000   | YES | YES |
| 101 | a | 1473.53 | 1.56698   | YES | YES |
| 102 | a | 1480.00 | 4.87732   | YES | YES |
| 103 | a | 2852.99 | 18.16933  | YES | YES |
| 104 | a | 2854.32 | 36.06683  | YES | YES |
| 105 | a | 2862.70 | 52.53706  | YES | YES |
| 106 | a | 2872.34 | 155.22682 | YES | YES |
| 107 | a | 2873.65 | 4.97102   | YES | YES |
| 108 | a | 2874.35 | 65.19424  | YES | YES |
| 109 | a | 2884.96 | 65.52497  | YES | YES |
| 110 | a | 2890.08 | 27.11976  | YES | YES |
| 111 | a | 2891.86 | 110.24014 | YES | YES |
| 112 | a | 2892.02 | 75.63505  | YES | YES |
| 113 | a | 2893.86 | 53.87535  | YES | YES |
| 114 | a | 2904.04 | 11.64879  | YES | YES |
| 115 | a | 2912.21 | 56.59625  | YES | YES |
| 116 | a | 2920.09 | 59.78632  | YES | YES |
| 117 | a | 2923.77 | 55.83973  | YES | YES |
| 118 | a | 2936.97 | 57.93441  | YES | YES |
| 119 | a | 2986.85 | 14.49728  | YES | YES |
| 120 | a | 2988.64 | 29.03319  | YES | YES |
| 121 | a | 2993.52 | 50.71366  | YES | YES |
| 122 | a | 2994.94 | 24.75717  | YES | YES |
| 123 | a | 2996.28 | 32.36437  | YES | YES |
| 124 | a | 3000.63 | 36.37844  | YES | YES |
| 125 | a | 3010.56 | 46.17818  | YES | YES |
| 126 | a | 3015.02 | 24.39113  | YES | YES |

---

*Optimized atomic coordinates from the DFT (B3LYP/TZVPP) calculations (Bohr Units):*

---

|                   |                  |                  |   |
|-------------------|------------------|------------------|---|
| -6.20512996928068 | 0.85722369842209 | 0.27101107973335 | c |
| -6.58526068606560 | 2.88617703948955 | 1.96837161713849 | o |

---



|                   |                   |                   |   |
|-------------------|-------------------|-------------------|---|
| -4.59638173291854 | 4.59103791715467  | 2.42689460751557  | c |
| -3.69081746326448 | 6.10415839471114  | 0.12660197636102  | c |
| -2.09045216411129 | 4.74660587634801  | -1.53101633280916 | o |
| 0.48974517084656  | 4.74975472236744  | -0.86807132989011 | c |
| 1.86621952489711  | 2.92737440309165  | -2.61509654791317 | c |
| 4.43592409941199  | 2.90121493957963  | -1.87629987417869 | o |
| 6.01255349967661  | 1.21093613409059  | -3.18905433716719 | c |
| 5.80169176790235  | -1.53279326866586 | -2.32263691475969 | c |
| 3.55565349525208  | -2.59748869878272 | -3.27770308560770 | o |
| 3.07750952710504  | -5.14140827584311 | -2.68356743103353 | c |
| 2.56071413115203  | -5.68461230396698 | 0.10602050449248  | c |
| 0.68366608325710  | -4.03799785002905 | 0.99700673025812  | o |
| -0.24232526035890 | -4.60413928692528 | 3.42990855176109  | c |
| -1.78891553058106 | -2.39237620395508 | 4.44170860950115  | c |
| -4.08192539919431 | -1.93914962465036 | 3.19489493845689  | o |
| -3.91754759504736 | -0.81274354734019 | 0.77412345071947  | c |
| -6.05180008808239 | 1.53625592903091  | -1.70675019575462 | h |
| -7.93887058852754 | -0.29150719414711 | 0.42482810941412  | h |
| -2.96358644895515 | 3.64364174953938  | 3.34229525308578  | h |
| -5.36641438410685 | 5.94072998639868  | 3.82128745495115  | h |
| -5.35866814463908 | 6.68258963557193  | -0.98725976585797 | h |
| -2.72861170849400 | 7.84837664152156  | 0.78974630473216  | h |
| 1.30277394651351  | 6.67800538700979  | -1.04487683989524 | h |
| 0.79048160195050  | 4.12669732941114  | 1.11107359643467  | h |
| 1.66936035174230  | 3.56204865151765  | -4.60637428970833 | h |
| 1.01932838241441  | 1.02819160623462  | -2.46432075097520 | h |
| 7.96656450149873  | 1.85286400693683  | -2.83309228415618 | h |
| 5.66205617937818  | 1.30038789180751  | -5.25641510939993 | h |
| 5.84379594935035  | -1.56660158224135 | -0.22826020506783 | h |
| 7.47235786476113  | -2.60633137399758 | -3.02225183638878 | h |
| 4.66603403240663  | -6.37213841949582 | -3.30637546184520 | h |
| 1.38947500237140  | -5.65507115928027 | -3.79313361583266 | h |
| 4.30653507093791  | -5.48707184621599 | 1.25940102598387  | h |
| 1.95908301415183  | -7.69343420215305 | 0.26129830435456  | h |
| 1.34908482006099  | -4.95489334468274 | 4.75972338041465  | h |
| -1.42442736942779 | -6.33982929658766 | 3.38019330645793  | h |
| -2.27796085812915 | -2.80789814072878 | 6.42871448209734  | h |
| -0.57571882601590 | -0.67688784443128 | 4.42156062398378  | h |
| -2.15834741702532 | 0.29148215632719  | 0.60279697106174  | h |
| -3.83744638281353 | -2.27138063244160 | -0.72690467066841 | h |

*List of calculated frequencies (B3LYP/TZVPP):*

| # | mode # | symmetry | wave number<br>cm**(-1) | IR intensity<br>km/mol | IR  | selection rules<br>RAMAN |
|---|--------|----------|-------------------------|------------------------|-----|--------------------------|
|   | 1      |          | 0.00                    | 0.00000                | -   | -                        |
|   | 2      |          | 0.00                    | 0.00000                | -   | -                        |
|   | 3      |          | 0.00                    | 0.00000                | -   | -                        |
|   | 4      |          | 0.00                    | 0.00000                | -   | -                        |
|   | 5      |          | 0.00                    | 0.00000                | -   | -                        |
|   | 6      |          | 0.00                    | 0.00000                | -   | -                        |
|   | 7      | a        | 35.78                   | 0.33149                | YES | YES                      |
|   | 8      | a        | 47.34                   | 0.06481                | YES | YES                      |

---

|    |   |         |          |     |     |
|----|---|---------|----------|-----|-----|
| 9  | a | 52.28   | 0.41477  | YES | YES |
| 10 | a | 69.91   | 0.92235  | YES | YES |
| 11 | a | 78.12   | 1.32664  | YES | YES |
| 12 | a | 86.84   | 0.62972  | YES | YES |
| 13 | a | 97.09   | 3.02059  | YES | YES |
| 14 | a | 115.84  | 3.38509  | YES | YES |
| 15 | a | 127.67  | 5.24421  | YES | YES |
| 16 | a | 156.02  | 2.02774  | YES | YES |
| 17 | a | 168.88  | 5.75403  | YES | YES |
| 18 | a | 180.55  | 9.82884  | YES | YES |
| 19 | a | 181.28  | 2.19762  | YES | YES |
| 20 | a | 213.29  | 2.18389  | YES | YES |
| 21 | a | 246.63  | 7.88050  | YES | YES |
| 22 | a | 269.96  | 4.30651  | YES | YES |
| 23 | a | 281.45  | 1.75651  | YES | YES |
| 24 | a | 306.59  | 2.36811  | YES | YES |
| 25 | a | 316.68  | 0.05494  | YES | YES |
| 26 | a | 359.15  | 3.50239  | YES | YES |
| 27 | a | 368.99  | 1.04542  | YES | YES |
| 28 | a | 374.79  | 1.34766  | YES | YES |
| 29 | a | 394.58  | 2.72691  | YES | YES |
| 30 | a | 422.83  | 0.14745  | YES | YES |
| 31 | a | 488.21  | 0.85263  | YES | YES |
| 32 | a | 515.28  | 17.08768 | YES | YES |
| 33 | a | 529.95  | 3.19580  | YES | YES |
| 34 | a | 534.70  | 6.14580  | YES | YES |
| 35 | a | 586.44  | 9.36506  | YES | YES |
| 36 | a | 597.50  | 12.10547 | YES | YES |
| 37 | a | 805.65  | 6.37070  | YES | YES |
| 38 | a | 818.90  | 0.56151  | YES | YES |
| 39 | a | 836.80  | 4.26156  | YES | YES |
| 40 | a | 839.48  | 8.16001  | YES | YES |
| 41 | a | 855.81  | 13.80410 | YES | YES |
| 42 | a | 885.99  | 27.94921 | YES | YES |
| 43 | a | 899.41  | 9.62925  | YES | YES |
| 44 | a | 923.43  | 15.86034 | YES | YES |
| 45 | a | 929.87  | 19.34832 | YES | YES |
| 46 | a | 953.78  | 31.96730 | YES | YES |
| 47 | a | 963.62  | 38.82066 | YES | YES |
| 48 | a | 1020.96 | 50.84890 | YES | YES |
| 49 | a | 1031.16 | 0.84920  | YES | YES |
| 50 | a | 1051.11 | 21.39657 | YES | YES |
| 51 | a | 1062.91 | 19.25609 | YES | YES |
| 52 | a | 1074.61 | 18.95457 | YES | YES |
| 53 | a | 1089.07 | 22.54802 | YES | YES |
| 54 | a | 1093.18 | 34.58191 | YES | YES |
| 55 | a | 1119.77 | 1.65627  | YES | YES |
| 56 | a | 1126.23 | 30.90919 | YES | YES |
| 57 | a | 1137.71 | 6.72522  | YES | YES |
| 58 | a | 1156.19 | 9.63024  | YES | YES |
| 59 | a | 1159.74 | 33.70442 | YES | YES |

---

---

|     |   |         |           |     |     |
|-----|---|---------|-----------|-----|-----|
| 60  | a | 1168.02 | 2.67611   | YES | YES |
| 61  | a | 1173.10 | 125.20093 | YES | YES |
| 62  | a | 1179.79 | 54.77810  | YES | YES |
| 63  | a | 1198.16 | 290.50333 | YES | YES |
| 64  | a | 1201.61 | 177.68758 | YES | YES |
| 65  | a | 1204.68 | 91.58495  | YES | YES |
| 66  | a | 1219.53 | 91.17060  | YES | YES |
| 67  | a | 1241.41 | 8.31287   | YES | YES |
| 68  | a | 1271.02 | 22.84402  | YES | YES |
| 69  | a | 1274.00 | 3.47085   | YES | YES |
| 70  | a | 1285.22 | 11.26834  | YES | YES |
| 71  | a | 1293.19 | 34.76247  | YES | YES |
| 72  | a | 1296.71 | 47.09419  | YES | YES |
| 73  | a | 1304.72 | 29.16991  | YES | YES |
| 74  | a | 1317.38 | 7.04941   | YES | YES |
| 75  | a | 1326.15 | 26.52728  | YES | YES |
| 76  | a | 1336.27 | 42.74520  | YES | YES |
| 77  | a | 1344.50 | 37.80384  | YES | YES |
| 78  | a | 1347.65 | 10.82561  | YES | YES |
| 79  | a | 1376.33 | 10.78246  | YES | YES |
| 80  | a | 1389.13 | 54.74222  | YES | YES |
| 81  | a | 1396.21 | 31.65167  | YES | YES |
| 82  | a | 1406.46 | 34.47195  | YES | YES |
| 83  | a | 1409.21 | 10.26782  | YES | YES |
| 84  | a | 1420.46 | 23.05627  | YES | YES |
| 85  | a | 1425.48 | 11.02768  | YES | YES |
| 86  | a | 1429.16 | 3.16059   | YES | YES |
| 87  | a | 1436.34 | 5.00476   | YES | YES |
| 88  | a | 1438.05 | 8.22595   | YES | YES |
| 89  | a | 1452.59 | 3.90378   | YES | YES |
| 90  | a | 1455.99 | 2.46823   | YES | YES |
| 91  | a | 1466.00 | 12.60196  | YES | YES |
| 92  | a | 1469.61 | 5.48814   | YES | YES |
| 93  | a | 1470.60 | 1.43649   | YES | YES |
| 94  | a | 1475.28 | 3.95863   | YES | YES |
| 95  | a | 1480.01 | 4.83929   | YES | YES |
| 96  | a | 1481.64 | 5.19303   | YES | YES |
| 97  | a | 1490.32 | 13.11846  | YES | YES |
| 98  | a | 1499.69 | 4.78221   | YES | YES |
| 99  | a | 1509.00 | 11.83774  | YES | YES |
| 100 | a | 1517.77 | 1.55518   | YES | YES |
| 101 | a | 1520.44 | 1.24754   | YES | YES |
| 102 | a | 1527.31 | 4.64750   | YES | YES |
| 103 | a | 2940.70 | 13.02609  | YES | YES |
| 104 | a | 2941.61 | 29.89065  | YES | YES |
| 105 | a | 2949.90 | 46.05800  | YES | YES |
| 106 | a | 2960.36 | 171.06594 | YES | YES |
| 107 | a | 2962.44 | 7.53883   | YES | YES |
| 108 | a | 2963.50 | 26.08794  | YES | YES |
| 109 | a | 2972.86 | 58.84622  | YES | YES |
| 110 | a | 2975.75 | 27.61233  | YES | YES |

---

|     |   |         |          |     |     |
|-----|---|---------|----------|-----|-----|
| 111 | a | 2981.02 | 76.89981 | YES | YES |
| 112 | a | 2982.13 | 53.03169 | YES | YES |
| 113 | a | 2983.25 | 76.93931 | YES | YES |
| 114 | a | 2992.16 | 8.80885  | YES | YES |
| 115 | a | 2997.64 | 63.00054 | YES | YES |
| 116 | a | 3010.70 | 49.05224 | YES | YES |
| 117 | a | 3011.11 | 67.48237 | YES | YES |
| 118 | a | 3021.18 | 62.71819 | YES | YES |
| 119 | a | 3064.62 | 41.08379 | YES | YES |
| 120 | a | 3069.72 | 44.45686 | YES | YES |
| 121 | a | 3073.78 | 64.71315 | YES | YES |
| 122 | a | 3074.02 | 12.63052 | YES | YES |
| 123 | a | 3077.55 | 2.02161  | YES | YES |
| 124 | a | 3088.08 | 48.74935 | YES | YES |
| 125 | a | 3090.19 | 25.79885 | YES | YES |
| 126 | a | 3094.63 | 36.87228 | YES | YES |

### 1.4. Ga(C<sub>6</sub>H<sub>5</sub>F)<sub>2</sub><sup>+</sup>

*Optimized atomic coordinates from the DFT (BP86/SV(P)) calculations (Bohr Units):*

|                   |                   |                   |    |
|-------------------|-------------------|-------------------|----|
| 5.01464239860959  | -1.29613313024807 | -1.81898898344002 | c  |
| 3.96222673426974  | 0.71401883039194  | -3.21873656450225 | c  |
| 3.66333396322131  | 3.12336701489755  | -2.11016054496734 | c  |
| 4.43995297663052  | 3.52207066577138  | 0.41228868691652  | c  |
| 5.50687503173257  | 1.53815665350423  | 1.82929563473376  | c  |
| 5.80231888481137  | -0.84618782395606 | 0.68498119772346  | c  |
| 2.88028929062839  | 4.69839816514591  | -3.22290241665645 | h  |
| 3.40692635847744  | 0.39690355525456  | -5.20105439676464 | h  |
| 5.30345480550166  | -3.18048047305963 | -2.65472188933574 | h  |
| 4.23635259998424  | 5.40361816996947  | 1.28183503391135  | h  |
| 6.15356598934639  | 1.81686492946910  | 3.78770676670408  | h  |
| 6.84750871445013  | -2.72302026441370 | 1.99645826120718  | f  |
| -3.86220464746969 | -3.27060152173032 | -1.91413800152780 | c  |
| -4.02480512841833 | -0.91709779057988 | -3.16071028436385 | c  |
| -4.93158760936907 | 1.23443943934049  | -1.87318517943338 | c  |
| -5.71168065286452 | 0.98416271769010  | 0.66109526605340  | c  |
| -5.55802135757568 | -1.34478454565691 | 1.93839651367488  | c  |
| -4.63493772275672 | -3.47150115076779 | 0.63270576947711  | c  |
| -6.19842555405484 | -1.46777219752173 | 3.91473416368250  | h  |
| -4.54036004084843 | -5.30839152394765 | 1.60956795852829  | h  |
| -3.18875996946631 | -4.95349838153622 | -2.93706472347070 | h  |
| -3.47191080039997 | -0.75327799398317 | -5.16213715794069 | h  |
| -5.11338230119785 | 3.08003304454484  | -2.81815314663615 | h  |
| -6.60732616764953 | 3.00046882752307  | 1.87349028688092  | f  |
| -0.00023270301180 | -0.06655077560782 | 0.47769093424378  | ga |

*List of calculated frequencies (BP86/SV(P)):*

| # mode | symmetry | wave number           | IR intensity | selection rules |
|--------|----------|-----------------------|--------------|-----------------|
| #      |          | cm <sup>-1</sup> (-1) | km/mol       | IR RAMAN        |
| 1      |          | 0.00                  | 0.00000      | - -             |

---

|    |   |         |           |     |     |
|----|---|---------|-----------|-----|-----|
| 2  |   | 0.00    | 0.00000   | -   | -   |
| 3  |   | 0.00    | 0.00000   | -   | -   |
| 4  |   | 0.00    | 0.00000   | -   | -   |
| 5  |   | 0.00    | 0.00000   | -   | -   |
| 6  |   | 0.00    | 0.00000   | -   | -   |
| 7  | a | 5.99    | 0.71031   | YES | YES |
| 8  | a | 11.29   | 0.77824   | YES | YES |
| 9  | a | 20.67   | 0.19781   | YES | YES |
| 10 | a | 58.17   | 0.15841   | YES | YES |
| 11 | a | 77.87   | 3.04076   | YES | YES |
| 12 | a | 95.31   | 0.47229   | YES | YES |
| 13 | a | 103.24  | 5.93315   | YES | YES |
| 14 | a | 122.03  | 53.47025  | YES | YES |
| 15 | a | 124.63  | 22.58805  | YES | YES |
| 16 | a | 232.47  | 0.68788   | YES | YES |
| 17 | a | 234.19  | 0.01547   | YES | YES |
| 18 | a | 385.71  | 0.11593   | YES | YES |
| 19 | a | 386.95  | 0.27010   | YES | YES |
| 20 | a | 403.80  | 1.92233   | YES | YES |
| 21 | a | 404.08  | 2.32719   | YES | YES |
| 22 | a | 492.07  | 17.53766  | YES | YES |
| 23 | a | 492.79  | 1.94194   | YES | YES |
| 24 | a | 508.18  | 4.25488   | YES | YES |
| 25 | a | 508.55  | 3.78657   | YES | YES |
| 26 | a | 597.64  | 0.05921   | YES | YES |
| 27 | a | 598.07  | 0.20611   | YES | YES |
| 28 | a | 659.27  | 8.65224   | YES | YES |
| 29 | a | 659.65  | 8.74641   | YES | YES |
| 30 | a | 774.85  | 190.01939 | YES | YES |
| 31 | a | 778.76  | 19.83890  | YES | YES |
| 32 | a | 809.67  | 19.06265  | YES | YES |
| 33 | a | 809.94  | 8.51291   | YES | YES |
| 34 | a | 843.01  | 1.20227   | YES | YES |
| 35 | a | 843.31  | 0.97259   | YES | YES |
| 36 | a | 902.48  | 0.51811   | YES | YES |
| 37 | a | 904.02  | 9.61933   | YES | YES |
| 38 | a | 963.17  | 0.00172   | YES | YES |
| 39 | a | 965.46  | 0.16974   | YES | YES |
| 40 | a | 978.41  | 2.83327   | YES | YES |
| 41 | a | 979.42  | 1.47511   | YES | YES |
| 42 | a | 984.59  | 1.59291   | YES | YES |
| 43 | a | 986.01  | 0.33823   | YES | YES |
| 44 | a | 1008.10 | 7.17340   | YES | YES |
| 45 | a | 1008.79 | 1.42062   | YES | YES |
| 46 | a | 1058.02 | 4.07383   | YES | YES |
| 47 | a | 1058.35 | 5.18765   | YES | YES |
| 48 | a | 1138.78 | 1.51237   | YES | YES |
| 49 | a | 1140.50 | 9.12239   | YES | YES |
| 50 | a | 1143.24 | 1.55596   | YES | YES |
| 51 | a | 1143.58 | 0.47024   | YES | YES |
| 52 | a | 1268.52 | 147.46302 | YES | YES |
| 53 | a | 1270.66 | 24.27741  | YES | YES |
| 54 | a | 1284.20 | 0.13922   | YES | YES |

---

---

|    |   |         |           |     |     |
|----|---|---------|-----------|-----|-----|
| 55 | a | 1284.51 | 0.30668   | YES | YES |
| 56 | a | 1374.01 | 0.27196   | YES | YES |
| 57 | a | 1374.78 | 0.32105   | YES | YES |
| 58 | a | 1440.27 | 8.40962   | YES | YES |
| 59 | a | 1440.63 | 5.57881   | YES | YES |
| 60 | a | 1488.77 | 147.09070 | YES | YES |
| 61 | a | 1489.11 | 83.54668  | YES | YES |
| 62 | a | 1583.36 | 4.93938   | YES | YES |
| 63 | a | 1584.42 | 8.98799   | YES | YES |
| 64 | a | 1600.18 | 38.08057  | YES | YES |
| 65 | a | 1600.98 | 98.72419  | YES | YES |
| 66 | a | 3114.19 | 0.01181   | YES | YES |
| 67 | a | 3114.69 | 0.04675   | YES | YES |
| 68 | a | 3120.95 | 0.09676   | YES | YES |
| 69 | a | 3121.51 | 0.13109   | YES | YES |
| 70 | a | 3130.97 | 0.36971   | YES | YES |
| 71 | a | 3131.31 | 0.87564   | YES | YES |
| 72 | a | 3135.30 | 3.65319   | YES | YES |
| 73 | a | 3135.66 | 5.62580   | YES | YES |
| 74 | a | 3138.09 | 1.60526   | YES | YES |
| 75 | a | 3138.28 | 1.93123   | YES | YES |

---

*Optimized atomic coordinates from the DFT (B3LYP/TZVPP) calculations (Bohr Units):*

---

|                   |                   |                   |    |
|-------------------|-------------------|-------------------|----|
| 5.57439200483829  | -1.15272522462723 | -1.30072144249219 | c  |
| 5.01436994952501  | 1.01395204033279  | -2.69672164448345 | c  |
| 4.49017105913581  | 3.29202279253722  | -1.47499880383740 | c  |
| 4.53494939654797  | 3.40687226421203  | 1.16142606963569  | c  |
| 5.08912127922777  | 1.25793340913663  | 2.58459153404926  | c  |
| 5.61418903234836  | -0.98520087314422 | 1.32073367495384  | c  |
| 4.10188803979544  | 4.97475521005855  | -2.56674447126687 | h  |
| 5.02388239575065  | 0.92345807382995  | -4.73877379175574 | h  |
| 6.03164236454423  | -2.92648935818574 | -2.20654557162319 | h  |
| 4.16776171678011  | 5.17633770149379  | 2.11645840423910  | h  |
| 5.17600082913778  | 1.31268899175084  | 4.62545976632580  | h  |
| 6.17705816944795  | -3.04476349084190 | 2.66826966562119  | f  |
| -4.50732499883107 | -3.37564955653209 | -1.25784697251961 | c  |
| -5.02328641669513 | -1.17162977873119 | -2.61241145894318 | c  |
| -5.56545131854156 | 1.07838419126483  | -1.34869475410350 | c  |
| -5.59954109465365 | 1.06692443842058  | 1.27866585078926  | c  |
| -5.08213542578344 | -1.09979343129552 | 2.67399552746728  | c  |
| -4.54216031528304 | -3.33400220204120 | 1.38067221939585  | c  |
| -5.16320121306604 | -1.03160596974980 | 4.71471491075434  | h  |
| -4.18048843129604 | -5.04520089841011 | 2.43846725597606  | h  |
| -4.13159466533986 | -5.12217884919888 | -2.24917690917753 | h  |
| -5.03864928328782 | -1.20429715798718 | -4.65617456894496 | h  |
| -6.01518169148936 | 2.79731099625861  | -2.35804223511050 | h  |
| -6.14757677080957 | 3.20627578203210  | 2.50210436553179  | f  |
| 0.00116538799718  | -0.01337910058240 | 0.00129337951864  | ga |

---

## 1.5.In(C<sub>6</sub>H<sub>5</sub>F)<sub>2</sub><sup>+</sup>

Optimized atomic coordinates from the DFT (BP86/SV(P)) calculations (Bohr Units):

|                   |                   |                   |    |
|-------------------|-------------------|-------------------|----|
| 0.00133114733740  | -1.22788062670430 | -0.00105039965019 | in |
| -1.87683389269028 | -1.26589210016344 | -5.92636457456360 | c  |
| 1.87555845498718  | -1.26603650827099 | 5.92533605647056  | c  |
| -1.25048398449920 | 1.26529809686779  | -5.38868062092112 | c  |
| 1.24943852103799  | 1.26513821708566  | 5.38746732674127  | c  |
| -2.72140345421286 | 2.60644202475120  | -3.61516937729770 | c  |
| 2.72152927207539  | 2.60652481375626  | 3.61514224518978  | c  |
| -4.76223156987490 | 1.41745431963728  | -2.37338093993388 | c  |
| 4.76327856905097  | 1.41772630683965  | 2.37461389524395  | c  |
| -5.33794573208917 | -1.13006592314497 | -2.92143037390217 | c  |
| 5.33878898397449  | -1.12983666158273 | 2.92285646650611  | c  |
| -3.89131070216040 | -2.49225296752521 | -4.69362144928719 | c  |
| 3.89095011130293  | -2.49222618744919 | 4.69394065924856  | c  |
| -0.52780131890206 | -2.52954776804405 | -7.64031823405375 | f  |
| 0.52543334310009  | -2.52989937655723 | 7.63820073517072  | f  |
| 0.31441496576922  | 2.17007145252573  | -6.42065651567320 | h  |
| -0.31616663570019 | 2.16973040174559  | 6.41842249586315  | h  |
| -2.29107990886740 | 4.60953502536123  | -3.23824887012744 | h  |
| 2.29154158366326  | 4.60963458244502  | 3.23793125757472  | h  |
| -5.93762236242687 | 2.48910298890425  | -1.03046022845991 | h  |
| 5.93957799720096  | 2.48955067939730  | 1.03254450484814  | h  |
| -6.95089538905645 | -2.06081438994654 | -1.98901267860604 | h  |
| 6.95249421890777  | -2.06040300666511 | 1.99144892934437  | h  |
| -4.33666380155743 | -4.46568923116156 | -5.18345581894387 | h  |
| 4.33610158362965  | -4.46566416210136 | 5.18394550921864  | h  |

List of calculated frequencies (BP86/SV(P)):

| # mode | symmetry | wave number           | IR intensity | selection rules |       |
|--------|----------|-----------------------|--------------|-----------------|-------|
| #      |          | cm <sup>**</sup> (-1) | km/mol       | IR              | RAMAN |
| 1      |          | 0.00                  | 0.00000      | -               | -     |
| 2      |          | 0.00                  | 0.00000      | -               | -     |
| 3      |          | 0.00                  | 0.00000      | -               | -     |
| 4      |          | 0.00                  | 0.00000      | -               | -     |
| 5      |          | 0.00                  | 0.00000      | -               | -     |
| 6      |          | 0.00                  | 0.00000      | -               | -     |
| 7      | a        | 5.53                  | 0.45669      | YES             | YES   |
| 8      | a        | 10.98                 | 0.13456      | YES             | YES   |
| 9      | a        | 15.85                 | 0.58710      | YES             | YES   |
| 10     | a        | 56.49                 | 0.19270      | YES             | YES   |
| 11     | a        | 69.62                 | 2.07597      | YES             | YES   |
| 12     | a        | 89.81                 | 0.03258      | YES             | YES   |
| 13     | a        | 93.55                 | 3.13209      | YES             | YES   |
| 14     | a        | 103.72                | 48.18639     | YES             | YES   |
| 15     | a        | 105.06                | 0.27559      | YES             | YES   |
| 16     | a        | 233.07                | 0.66312      | YES             | YES   |
| 17     | a        | 234.62                | 0.00116      | YES             | YES   |
| 18     | a        | 392.85                | 0.19540      | YES             | YES   |
| 19     | a        | 393.27                | 0.31868      | YES             | YES   |
| 20     | a        | 404.76                | 1.32676      | YES             | YES   |

---

|    |   |         |           |     |     |
|----|---|---------|-----------|-----|-----|
| 21 | a | 404.82  | 2.61197   | YES | YES |
| 22 | a | 496.39  | 20.64424  | YES | YES |
| 23 | a | 496.98  | 0.36730   | YES | YES |
| 24 | a | 509.79  | 4.95523   | YES | YES |
| 25 | a | 509.79  | 3.38183   | YES | YES |
| 26 | a | 600.00  | 0.03200   | YES | YES |
| 27 | a | 600.19  | 0.21468   | YES | YES |
| 28 | a | 669.83  | 19.47051  | YES | YES |
| 29 | a | 670.23  | 2.18669   | YES | YES |
| 30 | a | 772.92  | 203.78073 | YES | YES |
| 31 | a | 776.68  | 15.92802  | YES | YES |
| 32 | a | 810.69  | 20.07348  | YES | YES |
| 33 | a | 810.91  | 8.03582   | YES | YES |
| 34 | a | 841.81  | 1.05660   | YES | YES |
| 35 | a | 841.91  | 0.65446   | YES | YES |
| 36 | a | 904.03  | 0.49663   | YES | YES |
| 37 | a | 904.46  | 12.65333  | YES | YES |
| 38 | a | 963.29  | 0.03042   | YES | YES |
| 39 | a | 964.99  | 0.23189   | YES | YES |
| 40 | a | 979.66  | 4.78606   | YES | YES |
| 41 | a | 979.96  | 0.05048   | YES | YES |
| 42 | a | 986.93  | 3.06761   | YES | YES |
| 43 | a | 987.67  | 0.00226   | YES | YES |
| 44 | a | 1008.52 | 8.63363   | YES | YES |
| 45 | a | 1008.99 | 0.27724   | YES | YES |
| 46 | a | 1057.81 | 3.55469   | YES | YES |
| 47 | a | 1057.97 | 4.96796   | YES | YES |
| 48 | a | 1139.14 | 1.30062   | YES | YES |
| 49 | a | 1140.23 | 9.15892   | YES | YES |
| 50 | a | 1142.54 | 1.47007   | YES | YES |
| 51 | a | 1142.68 | 0.17252   | YES | YES |
| 52 | a | 1267.26 | 148.29547 | YES | YES |
| 53 | a | 1269.21 | 21.90086  | YES | YES |
| 54 | a | 1284.07 | 0.00280   | YES | YES |
| 55 | a | 1284.10 | 0.36586   | YES | YES |
| 56 | a | 1372.41 | 0.21910   | YES | YES |
| 57 | a | 1372.72 | 0.29812   | YES | YES |
| 58 | a | 1440.07 | 9.61712   | YES | YES |
| 59 | a | 1440.33 | 4.97418   | YES | YES |
| 60 | a | 1489.14 | 178.29117 | YES | YES |
| 61 | a | 1489.41 | 49.50566  | YES | YES |
| 62 | a | 1586.13 | 4.56137   | YES | YES |
| 63 | a | 1586.71 | 9.93135   | YES | YES |
| 64 | a | 1601.26 | 24.64887  | YES | YES |
| 65 | a | 1601.49 | 106.37024 | YES | YES |
| 66 | a | 3112.43 | 0.00671   | YES | YES |
| 67 | a | 3112.60 | 0.06936   | YES | YES |
| 68 | a | 3119.88 | 0.16439   | YES | YES |
| 69 | a | 3120.06 | 0.28134   | YES | YES |
| 70 | a | 3129.07 | 0.19639   | YES | YES |
| 71 | a | 3129.19 | 0.41733   | YES | YES |
| 72 | a | 3134.08 | 4.01496   | YES | YES |
| 73 | a | 3134.25 | 5.03040   | YES | YES |

---



|    |   |         |         |     |     |
|----|---|---------|---------|-----|-----|
| 74 | a | 3136.21 | 0.37896 | YES | YES |
| 75 | a | 3136.31 | 1.00814 | YES | YES |

*Optimized atomic coordinates from the DFT (B3LYP/TZVPP) calculations (Bohr Units):*

|                    |                    |                   |    |
|--------------------|--------------------|-------------------|----|
| 0.0000000000000000 | 0.0000000000000000 | -1.15708661177660 | in |
| -1.96827134371198  | 5.95110560607800   | -1.28216801499114 | c  |
| 1.96827134371198   | -5.95110560607800  | -1.28216801499114 | c  |
| -1.39339606817042  | 5.51464854741643   | 1.24418624465522  | c  |
| 1.39339606817042   | -5.51464854741643  | 1.24418624465522  | c  |
| -2.88370110397541  | 3.81246378045122   | 2.59969837110466  | c  |
| 2.88370110397541   | -3.81246378045122  | 2.59969837110466  | c  |
| -4.89175681012189  | 2.56595402277705   | 1.42779483119425  | c  |
| 4.89175681012189   | -2.56595402277705  | 1.42779483119425  | c  |
| -5.42211734261196  | 3.03535676891120   | -1.11357228244301 | c  |
| 5.42211734261196   | -3.03535676891120  | -1.11357228244301 | c  |
| -3.95433530523120  | 4.73284362606027   | -2.49418497449862 | c  |
| 3.95433530523120   | -4.73284362606027  | -2.49418497449862 | c  |
| -0.56788404938921  | 7.60319197722172   | -2.58459989887564 | f  |
| 0.56788404938921   | -7.60319197722172  | -2.58459989887564 | f  |
| 0.13666930153441   | 6.54377639878920   | 2.12503195269899  | h  |
| -0.13666930153441  | -6.54377639878920  | 2.12503195269899  | h  |
| -2.50012014363908  | 3.50012105953534   | 4.58327364567543  | h  |
| 2.50012014363908   | -3.50012105953534  | 4.58327364567543  | h  |
| -6.07235343376358  | 1.28957144851043   | 2.50123180598889  | h  |
| 6.07235343376358   | -1.28957144851043  | 2.50123180598889  | h  |
| -7.00464558299461  | 2.10975726565654   | -2.01772296929303 | h  |
| 7.00464558299461   | -2.10975726565654  | -2.01772296929303 | h  |
| -4.35900402853487  | 5.15986939353423   | -4.45113894078494 | h  |
| 4.35900402853487   | -5.15986939353423  | -4.45113894078494 | h  |

*List of calculated frequencies (B3LYP/TZVPP):*

| # mode # | symmetry | wave number<br>cm <sup>**</sup> (-1) | IR intensity<br>km/mol | IR  | selection rules<br>RAMAN |
|----------|----------|--------------------------------------|------------------------|-----|--------------------------|
| 1        |          | 0.00                                 | 0.00000                | -   | -                        |
| 2        |          | 0.00                                 | 0.00000                | -   | -                        |
| 3        |          | 0.00                                 | 0.00000                | -   | -                        |
| 4        |          | 0.00                                 | 0.00000                | -   | -                        |
| 5        |          | 0.00                                 | 0.00000                | -   | -                        |
| 6        |          | 0.00                                 | 0.00000                | -   | -                        |
| 7        | b        | 1.23                                 | 0.68953                | YES | YES                      |
| 8        | a        | 2.93                                 | 0.90361                | YES | YES                      |
| 9        | a        | 9.57                                 | 0.10350                | YES | YES                      |
| 10       | a        | 50.91                                | 0.15140                | YES | YES                      |
| 11       | b        | 60.87                                | 2.75328                | YES | YES                      |
| 12       | a        | 81.74                                | 0.08280                | YES | YES                      |
| 13       | b        | 83.38                                | 29.67043               | YES | YES                      |
| 14       | b        | 88.98                                | 17.13578               | YES | YES                      |
| 15       | a        | 89.95                                | 0.20166                | YES | YES                      |
| 16       | b        | 241.55                               | 0.54370                | YES | YES                      |

---

|    |   |         |           |     |     |
|----|---|---------|-----------|-----|-----|
| 17 | a | 242.96  | 0.00039   | YES | YES |
| 18 | b | 408.60  | 1.47869   | YES | YES |
| 19 | a | 408.66  | 2.93524   | YES | YES |
| 20 | b | 417.83  | 0.17420   | YES | YES |
| 21 | a | 418.18  | 0.34405   | YES | YES |
| 22 | b | 516.48  | 24.64610  | YES | YES |
| 23 | a | 517.04  | 0.22590   | YES | YES |
| 24 | a | 526.21  | 3.75095   | YES | YES |
| 25 | b | 526.24  | 7.04314   | YES | YES |
| 26 | b | 624.35  | 0.03654   | YES | YES |
| 27 | a | 624.54  | 0.19772   | YES | YES |
| 28 | b | 704.32  | 31.20296  | YES | YES |
| 29 | a | 704.73  | 2.35690   | YES | YES |
| 30 | b | 800.32  | 195.63767 | YES | YES |
| 31 | a | 802.98  | 9.69148   | YES | YES |
| 32 | b | 828.57  | 27.00220  | YES | YES |
| 33 | a | 828.70  | 11.62661  | YES | YES |
| 34 | b | 871.29  | 0.34552   | YES | YES |
| 35 | a | 871.33  | 0.35413   | YES | YES |
| 36 | a | 940.23  | 0.56770   | YES | YES |
| 37 | b | 940.89  | 13.55192  | YES | YES |
| 38 | b | 1006.23 | 0.07552   | YES | YES |
| 39 | a | 1007.46 | 0.09440   | YES | YES |
| 40 | b | 1015.90 | 11.42633  | YES | YES |
| 41 | a | 1016.50 | 0.04392   | YES | YES |
| 42 | b | 1027.03 | 3.05621   | YES | YES |
| 43 | a | 1027.55 | 0.12388   | YES | YES |
| 44 | b | 1037.43 | 2.75893   | YES | YES |
| 45 | a | 1037.64 | 0.17196   | YES | YES |
| 46 | b | 1090.23 | 2.48775   | YES | YES |
| 47 | a | 1090.33 | 3.54487   | YES | YES |
| 48 | a | 1181.61 | 3.31669   | YES | YES |
| 49 | b | 1182.14 | 15.77961  | YES | YES |
| 50 | a | 1186.40 | 1.42062   | YES | YES |
| 51 | b | 1186.47 | 0.16886   | YES | YES |
| 52 | b | 1268.02 | 185.44600 | YES | YES |
| 53 | a | 1269.80 | 37.41031  | YES | YES |
| 54 | a | 1328.08 | 0.04979   | YES | YES |
| 55 | b | 1328.25 | 0.02857   | YES | YES |
| 56 | a | 1351.27 | 0.06718   | YES | YES |
| 57 | b | 1351.42 | 0.16345   | YES | YES |
| 58 | a | 1486.08 | 9.55330   | YES | YES |
| 59 | b | 1486.29 | 5.06872   | YES | YES |
| 60 | b | 1526.46 | 154.94215 | YES | YES |
| 61 | a | 1526.66 | 49.07439  | YES | YES |
| 62 | b | 1620.91 | 5.13833   | YES | YES |
| 63 | a | 1621.63 | 8.77453   | YES | YES |
| 64 | a | 1622.42 | 23.53698  | YES | YES |
| 65 | b | 1622.97 | 84.45056  | YES | YES |
| 66 | b | 3184.71 | 0.00249   | YES | YES |
| 67 | a | 3184.77 | 0.05468   | YES | YES |

---

---

|    |   |         |         |     |     |
|----|---|---------|---------|-----|-----|
| 68 | b | 3191.65 | 0.47769 | YES | YES |
| 69 | a | 3191.74 | 1.13061 | YES | YES |
| 70 | a | 3200.81 | 0.01536 | YES | YES |
| 71 | b | 3200.86 | 0.05472 | YES | YES |
| 72 | b | 3205.68 | 2.10837 | YES | YES |
| 73 | a | 3205.72 | 3.37840 | YES | YES |
| 74 | b | 3208.40 | 0.15473 | YES | YES |
| 75 | a | 3208.46 | 0.62825 | YES | YES |

---

### 1.6.Ga([18]crown-6)<sup>+</sup>

*Optimized atomic coordinates from the DFT (BP86/SV(P)) calculations (Bohr Units):*

---

|                   |                   |                   |    |
|-------------------|-------------------|-------------------|----|
| 0.00594834834875  | 0.00051630388377  | 0.00013968123174  | ga |
| 1.54629315469180  | 4.59585764109766  | 2.13426407810250  | o  |
| -1.94001615493059 | 4.55426030116082  | -1.88116157386683 | o  |
| -2.80164817863485 | 0.00374485668448  | -4.49017353778977 | o  |
| -1.53680399469164 | -4.59275796228938 | -2.14203806526230 | o  |
| 1.92691452194817  | -4.55573292203132 | 1.89056078591198  | o  |
| 2.81226737515188  | -0.00111646126165 | 4.47887455468939  | o  |
| -0.01854817676776 | 6.71767078828502  | 1.59241596417776  | c  |
| 2.31570465908852  | 4.48549123053717  | 4.71059375335450  | c  |
| -0.57253989860100 | 6.77359670550077  | -1.21377066094883 | c  |
| -2.70499156734475 | 4.52362822525831  | -4.46096659969114 | c  |
| -4.30026208457533 | 2.19546683364269  | -4.93102338651091 | c  |
| -4.08753992213218 | -2.28662492987184 | -5.07489068454783 | c  |
| -2.28551931031300 | -4.48114550080819 | -4.72445781703473 | c  |
| 0.01209627711264  | -6.72183091778170 | -1.58425151945660 | c  |
| 0.55031631094925  | -6.77021878516364 | 1.22520197433960  | c  |
| 2.68457135748808  | -4.51995867422031 | 4.47240627941313  | c  |
| 4.29462281933205  | -2.20060718007053 | 4.93602170457631  | c  |
| 4.11215864514511  | 2.28481818392259  | 5.05079788514196  | c  |
| 0.96375747338708  | 8.50880935136497  | 2.12846003947553  | h  |
| -1.81972024033448 | 6.60959451147581  | 2.68999351816884  | h  |
| 0.63911115527042  | 4.26175652286442  | 5.97649494727178  | h  |
| 3.31002764221608  | 6.26704695325896  | 5.25645641399596  | h  |
| -1.71457060766635 | 8.49637879241027  | -1.64730477613340 | h  |
| 1.22852860190076  | 6.89229838715010  | -2.31065766617462 | h  |
| -1.01926921013756 | 4.52229647440141  | -5.73398475161537 | h  |
| -3.85548903749560 | 6.23803518474223  | -4.90555176059723 | h  |
| -5.99286560739545 | 2.20269093512284  | -3.66753117601572 | h  |
| -4.97981562027794 | 2.22859902888880  | -6.93012752911175 | h  |
| -4.75112577567434 | -2.26348394939208 | -7.07944955690131 | h  |
| -5.77868411450315 | -2.52565205435641 | -3.83144758902911 | h  |
| -3.26959476510472 | -6.26505099476035 | -5.28089569986265 | h  |
| -0.59960539296672 | -4.25019725418435 | -5.97656141526967 | h  |
| 1.82006903518098  | -6.62858614083965 | -2.67183461067997 | h  |
| -0.97803988386224 | -8.50903227170811 | -2.11920336029148 | h  |
| -1.25715192388752 | -6.87413478169915 | 2.31292560276615  | h  |
| 1.68037940381318  | -8.49747925238080 | 1.67194139753420  | h  |

---

|                  |                   |                  |   |
|------------------|-------------------|------------------|---|
| 3.82205374765494 | -6.24029278899994 | 4.92736706775076 | h |
| 0.99540455507063 | -4.50169310191696 | 5.74074585056752 | h |
| 4.96751430384723 | -2.22768498550958 | 6.93746455121683 | h |
| 5.99100935682537 | -2.22619588111109 | 3.67793601325279 | h |
| 5.79573568352863 | 2.51479402604317  | 3.79547990201056 | h |
| 4.78931703934524 | 2.26212555266057  | 7.05074177184142 | h |

*List of calculated frequencies (BP86/SV(P)):*

| # | mode # | symmetry | wave number<br>cm**(-1) | IR intensity<br>km/mol | IR  | selection rules<br>RAMAN |
|---|--------|----------|-------------------------|------------------------|-----|--------------------------|
|   | 1      |          | 0.00                    | 0.00000                | -   | -                        |
|   | 2      |          | 0.00                    | 0.00000                | -   | -                        |
|   | 3      |          | 0.00                    | 0.00000                | -   | -                        |
|   | 4      |          | 0.00                    | 0.00000                | -   | -                        |
|   | 5      |          | 0.00                    | 0.00000                | -   | -                        |
|   | 6      |          | 0.00                    | 0.00000                | -   | -                        |
|   | 7      | a        | 26.68                   | 0.31448                | YES | YES                      |
|   | 8      | a        | 28.36                   | 0.19850                | YES | YES                      |
|   | 9      | a        | 30.57                   | 0.08059                | YES | YES                      |
|   | 10     | a        | 60.38                   | 47.58874               | YES | YES                      |
|   | 11     | a        | 60.49                   | 47.56666               | YES | YES                      |
|   | 12     | a        | 61.06                   | 0.10527                | YES | YES                      |
|   | 13     | a        | 89.14                   | 0.00219                | YES | YES                      |
|   | 14     | a        | 89.58                   | 0.00227                | YES | YES                      |
|   | 15     | a        | 127.55                  | 18.77882               | YES | YES                      |
|   | 16     | a        | 130.66                  | 0.00574                | YES | YES                      |
|   | 17     | a        | 138.49                  | 4.92999                | YES | YES                      |
|   | 18     | a        | 141.30                  | 4.99913                | YES | YES                      |
|   | 19     | a        | 144.66                  | 0.00403                | YES | YES                      |
|   | 20     | a        | 145.86                  | 0.00398                | YES | YES                      |
|   | 21     | a        | 175.10                  | 0.00303                | YES | YES                      |
|   | 22     | a        | 216.13                  | 1.13234                | YES | YES                      |
|   | 23     | a        | 242.57                  | 0.00678                | YES | YES                      |
|   | 24     | a        | 245.98                  | 19.06953               | YES | YES                      |
|   | 25     | a        | 248.10                  | 19.48330               | YES | YES                      |
|   | 26     | a        | 250.44                  | 0.01968                | YES | YES                      |
|   | 27     | a        | 252.23                  | 0.00184                | YES | YES                      |
|   | 28     | a        | 270.26                  | 0.00063                | YES | YES                      |
|   | 29     | a        | 308.98                  | 2.96369                | YES | YES                      |
|   | 30     | a        | 309.41                  | 2.74892                | YES | YES                      |
|   | 31     | a        | 342.08                  | 0.00565                | YES | YES                      |
|   | 32     | a        | 354.07                  | 0.00045                | YES | YES                      |
|   | 33     | a        | 354.50                  | 0.00030                | YES | YES                      |
|   | 34     | a        | 524.50                  | 0.83612                | YES | YES                      |
|   | 35     | a        | 525.02                  | 0.79926                | YES | YES                      |
|   | 36     | a        | 532.50                  | 0.00009                | YES | YES                      |
|   | 37     | a        | 539.43                  | 0.00011                | YES | YES                      |
|   | 38     | a        | 540.11                  | 0.00041                | YES | YES                      |
|   | 39     | a        | 573.07                  | 0.18583                | YES | YES                      |
|   | 40     | a        | 816.79                  | 0.00268                | YES | YES                      |
|   | 41     | a        | 817.45                  | 0.01887                | YES | YES                      |
|   | 42     | a        | 824.04                  | 22.69698               | YES | YES                      |

---

|    |   |         |           |     |     |
|----|---|---------|-----------|-----|-----|
| 43 | a | 830.21  | 47.03997  | YES | YES |
| 44 | a | 832.12  | 48.22000  | YES | YES |
| 45 | a | 874.75  | 0.00108   | YES | YES |
| 46 | a | 918.84  | 0.00042   | YES | YES |
| 47 | a | 924.63  | 0.02385   | YES | YES |
| 48 | a | 951.89  | 0.00210   | YES | YES |
| 49 | a | 952.47  | 0.00480   | YES | YES |
| 50 | a | 960.79  | 91.58917  | YES | YES |
| 51 | a | 962.03  | 93.27298  | YES | YES |
| 52 | a | 1047.88 | 19.41300  | YES | YES |
| 53 | a | 1048.20 | 19.39747  | YES | YES |
| 54 | a | 1065.67 | 0.00062   | YES | YES |
| 55 | a | 1073.32 | 0.00103   | YES | YES |
| 56 | a | 1074.12 | 0.00431   | YES | YES |
| 57 | a | 1080.14 | 0.01292   | YES | YES |
| 58 | a | 1086.57 | 0.00548   | YES | YES |
| 59 | a | 1096.46 | 0.00204   | YES | YES |
| 60 | a | 1097.13 | 0.04146   | YES | YES |
| 61 | a | 1104.10 | 29.53078  | YES | YES |
| 62 | a | 1117.23 | 558.33789 | YES | YES |
| 63 | a | 1117.52 | 570.54891 | YES | YES |
| 64 | a | 1119.12 | 7.25960   | YES | YES |
| 65 | a | 1119.77 | 10.16923  | YES | YES |
| 66 | a | 1133.75 | 0.05974   | YES | YES |
| 67 | a | 1144.11 | 0.00571   | YES | YES |
| 68 | a | 1144.38 | 0.00259   | YES | YES |
| 69 | a | 1152.89 | 0.01205   | YES | YES |
| 70 | a | 1218.19 | 0.00369   | YES | YES |
| 71 | a | 1223.92 | 8.96010   | YES | YES |
| 72 | a | 1225.28 | 8.74231   | YES | YES |
| 73 | a | 1232.58 | 0.01052   | YES | YES |
| 74 | a | 1233.63 | 0.00057   | YES | YES |
| 75 | a | 1236.11 | 52.07636  | YES | YES |
| 76 | a | 1256.71 | 0.06937   | YES | YES |
| 77 | a | 1263.93 | 0.00061   | YES | YES |
| 78 | a | 1264.92 | 0.00176   | YES | YES |
| 79 | a | 1275.49 | 28.97997  | YES | YES |
| 80 | a | 1276.60 | 27.67748  | YES | YES |
| 81 | a | 1281.02 | 0.00472   | YES | YES |
| 82 | a | 1326.68 | 0.00116   | YES | YES |
| 83 | a | 1337.19 | 75.17550  | YES | YES |
| 84 | a | 1338.59 | 74.46901  | YES | YES |
| 85 | a | 1355.85 | 0.00200   | YES | YES |
| 86 | a | 1355.98 | 0.00077   | YES | YES |
| 87 | a | 1372.48 | 0.03948   | YES | YES |
| 88 | a | 1377.70 | 0.23040   | YES | YES |
| 89 | a | 1398.99 | 0.00064   | YES | YES |
| 90 | a | 1399.98 | 0.00017   | YES | YES |
| 91 | a | 1422.01 | 34.38127  | YES | YES |
| 92 | a | 1424.31 | 33.59971  | YES | YES |
| 93 | a | 1433.92 | 0.00595   | YES | YES |

---

|     |   |         |           |     |     |
|-----|---|---------|-----------|-----|-----|
| 94  | a | 1437.30 | 0.00104   | YES | YES |
| 95  | a | 1439.13 | 26.06833  | YES | YES |
| 96  | a | 1439.85 | 25.43483  | YES | YES |
| 97  | a | 1441.64 | 0.05176   | YES | YES |
| 98  | a | 1442.47 | 0.04315   | YES | YES |
| 99  | a | 1443.23 | 0.65645   | YES | YES |
| 100 | a | 1464.43 | 29.84550  | YES | YES |
| 101 | a | 1464.98 | 0.25564   | YES | YES |
| 102 | a | 1465.65 | 0.04479   | YES | YES |
| 103 | a | 1467.81 | 1.40044   | YES | YES |
| 104 | a | 1468.27 | 1.51161   | YES | YES |
| 105 | a | 1472.55 | 0.01521   | YES | YES |
| 106 | a | 2905.12 | 0.74402   | YES | YES |
| 107 | a | 2905.46 | 19.06284  | YES | YES |
| 108 | a | 2905.76 | 8.01563   | YES | YES |
| 109 | a | 2906.36 | 0.10536   | YES | YES |
| 110 | a | 2906.91 | 0.12263   | YES | YES |
| 111 | a | 2907.46 | 4.71925   | YES | YES |
| 112 | a | 2909.45 | 78.50375  | YES | YES |
| 113 | a | 2909.98 | 1.24174   | YES | YES |
| 114 | a | 2910.83 | 2.56375   | YES | YES |
| 115 | a | 2911.70 | 134.81754 | YES | YES |
| 116 | a | 2911.90 | 146.67088 | YES | YES |
| 117 | a | 2913.58 | 0.44514   | YES | YES |
| 118 | a | 2950.18 | 1.23344   | YES | YES |
| 119 | a | 2950.64 | 98.08167  | YES | YES |
| 120 | a | 2950.96 | 100.80377 | YES | YES |
| 121 | a | 2953.71 | 0.05455   | YES | YES |
| 122 | a | 2954.37 | 0.13230   | YES | YES |
| 123 | a | 2957.63 | 0.07546   | YES | YES |
| 124 | a | 2960.41 | 212.30857 | YES | YES |
| 125 | a | 2962.99 | 0.02078   | YES | YES |
| 126 | a | 2964.04 | 0.00704   | YES | YES |
| 127 | a | 2966.50 | 3.88614   | YES | YES |
| 128 | a | 2966.73 | 2.11374   | YES | YES |
| 129 | a | 2967.74 | 0.01263   | YES | YES |

*Optimized atomic coordinates from the DFT (B3LYP/TZVPP) calculations (Bohr Units):*

|                   |                   |                   |    |
|-------------------|-------------------|-------------------|----|
| 0.000000000000000 | 0.000000000000000 | 0.000000000000000 | ga |
| -4.59272246682356 | -2.65160955253382 | 0.29685364361132  | o  |
| -4.59272246682356 | 2.65160955253382  | -0.29685364361132 | o  |
| 0.000000000000000 | 5.30321910506763  | 0.29685364361132  | o  |
| 4.59272246682357  | 2.65160955253381  | -0.29685364361132 | o  |
| 4.59272246682357  | -2.65160955253381 | 0.29685364361132  | o  |
| 0.000000000000000 | -5.30321910506763 | -0.29685364361132 | o  |
| -6.75278503021363 | -1.30262155748788 | -0.57497050047079 | c  |
| -4.50449587540856 | -5.19677260371632 | -0.57497050047079 | c  |
| -6.75278503021363 | 1.30262155748788  | 0.57497050047079  | c  |
| -4.50449587540856 | 5.19677260371632  | 0.57497050047079  | c  |
| -2.24828915480508 | 6.49939416120419  | -0.57497050047079 | c  |
| 2.24828915480508  | 6.49939416120419  | -0.57497050047079 | c  |

|                   |                   |                   |   |
|-------------------|-------------------|-------------------|---|
| 4.50449587540856  | 5.19677260371632  | 0.57497050047079  | c |
| 6.75278503021363  | 1.30262155748788  | 0.57497050047079  | c |
| 6.75278503021363  | -1.30262155748788 | -0.57497050047079 | c |
| 4.50449587540856  | -5.19677260371632 | -0.57497050047079 | c |
| 2.24828915480508  | -6.49939416120419 | 0.57497050047079  | c |
| -2.24828915480508 | -6.49939416120419 | 0.57497050047079  | c |
| -8.48180860084764 | -2.28810555018092 | -0.00449987872975 | h |
| -6.72894564697350 | -1.17632306398192 | -2.64178111216970 | h |
| -4.38319847995264 | -5.23927633897279 | -2.64178111216970 | h |
| -6.22246183342068 | -6.20140894328094 | -0.00449987872975 | h |
| -8.48180860084764 | 2.28810555018092  | 0.00449987872975  | h |
| -6.72894564697350 | 1.17632306398192  | 2.64178111216970  | h |
| -4.38319847995264 | 5.23927633897279  | 2.64178111216970  | h |
| -6.22246183342068 | 6.20140894328094  | 0.00449987872975  | h |
| -2.34574716702087 | 6.41559940295469  | -2.64178111216970 | h |
| -2.25934676742697 | 8.48951449346190  | -0.00449987872975 | h |
| 2.25934676742697  | 8.48951449346190  | -0.00449987872975 | h |
| 2.34574716702087  | 6.41559940295469  | -2.64178111216970 | h |
| 6.22246183342068  | 6.20140894328094  | 0.00449987872975  | h |
| 4.38319847995264  | 5.23927633897279  | 2.64178111216970  | h |
| 6.72894564697350  | 1.17632306398192  | 2.64178111216970  | h |
| 8.48180860084764  | 2.28810555018092  | 0.00449987872975  | h |
| 6.72894564697350  | -1.17632306398192 | -2.64178111216970 | h |
| 8.48180860084764  | -2.28810555018092 | -0.00449987872975 | h |
| 6.22246183342068  | -6.20140894328094 | -0.00449987872975 | h |
| 4.38319847995264  | -5.23927633897279 | -2.64178111216970 | h |
| 2.25934676742697  | -8.48951449346190 | 0.00449987872975  | h |
| 2.34574716702087  | -6.41559940295469 | 2.64178111216970  | h |
| -2.34574716702087 | -6.41559940295469 | 2.64178111216970  | h |
| -2.25934676742697 | -8.48951449346190 | 0.00449987872975  | h |

*List of calculated frequencies (B3LYP/TZVPP):*

| # mode # | symmetry | wave number<br>cm <sup>**</sup> (-1) | IR intensity<br>km/mol | IR  | selection rules<br>RAMAN |
|----------|----------|--------------------------------------|------------------------|-----|--------------------------|
|          | 1        | 0.00                                 | 0.00000                | -   | -                        |
|          | 2        | 0.00                                 | 0.00000                | -   | -                        |
|          | 3        | 0.00                                 | 0.00000                | -   | -                        |
|          | 4        | 0.00                                 | 0.00000                | -   | -                        |
|          | 5        | 0.00                                 | 0.00000                | -   | -                        |
|          | 6        | 0.00                                 | 0.00000                | -   | -                        |
| 7        | a2u      | 14.83                                | 0.13791                | YES | NO                       |
| 8        | eu       | 38.81                                | 0.10504                | YES | NO                       |
| 9        | eu       | 38.81                                | 0.10504                | YES | NO                       |
| 10       | eu       | 69.31                                | 43.81147               | YES | NO                       |
| 11       | eu       | 69.31                                | 43.81147               | YES | NO                       |
| 12       | a2g      | 70.83                                | 0.00000                | NO  | NO                       |
| 13       | eg       | 90.12                                | 0.00000                | NO  | YES                      |
| 14       | eg       | 90.12                                | 0.00000                | NO  | YES                      |
| 15       | a2u      | 122.66                               | 20.74993               | YES | NO                       |
| 16       | a1g      | 136.49                               | 0.00000                | NO  | YES                      |
| 17       | eu       | 141.20                               | 7.05186                | YES | NO                       |

---

|    |     |         |           |     |     |
|----|-----|---------|-----------|-----|-----|
| 18 | eu  | 141.20  | 7.05186   | YES | NO  |
| 19 | eg  | 143.07  | 0.00000   | NO  | YES |
| 20 | eg  | 143.07  | 0.00000   | NO  | YES |
| 21 | alu | 172.30  | 0.00000   | NO  | NO  |
| 22 | a2u | 217.74  | 1.57211   | YES | NO  |
| 23 | alg | 239.87  | 0.00000   | NO  | YES |
| 24 | eu  | 242.75  | 17.98718  | YES | NO  |
| 25 | eu  | 242.75  | 17.98718  | YES | NO  |
| 26 | eg  | 249.91  | 0.00000   | NO  | YES |
| 27 | eg  | 249.91  | 0.00000   | NO  | YES |
| 28 | alg | 268.44  | 0.00000   | NO  | YES |
| 29 | eu  | 310.82  | 2.97963   | YES | NO  |
| 30 | eu  | 310.82  | 2.97963   | YES | NO  |
| 31 | alu | 348.05  | 0.00000   | NO  | NO  |
| 32 | eg  | 357.46  | 0.00000   | NO  | YES |
| 33 | eg  | 357.46  | 0.00000   | NO  | YES |
| 34 | eu  | 531.12  | 1.24099   | YES | NO  |
| 35 | eu  | 531.12  | 1.24099   | YES | NO  |
| 36 | a2g | 540.12  | 0.00000   | NO  | NO  |
| 37 | eg  | 546.19  | 0.00000   | NO  | YES |
| 38 | eg  | 546.19  | 0.00000   | NO  | YES |
| 39 | a2u | 580.41  | 0.09178   | YES | NO  |
| 40 | eg  | 831.84  | 0.00000   | NO  | YES |
| 41 | eg  | 831.84  | 0.00000   | NO  | YES |
| 42 | a2u | 837.85  | 24.80769  | YES | NO  |
| 43 | eu  | 843.37  | 47.67553  | YES | NO  |
| 44 | eu  | 843.37  | 47.67553  | YES | NO  |
| 45 | alg | 878.07  | 0.00000   | NO  | YES |
| 46 | alu | 931.21  | 0.00000   | NO  | NO  |
| 47 | a2g | 943.75  | 0.00000   | NO  | NO  |
| 48 | eg  | 959.58  | 0.00000   | NO  | YES |
| 49 | eg  | 959.58  | 0.00000   | NO  | YES |
| 50 | eu  | 976.85  | 99.15220  | YES | NO  |
| 51 | eu  | 976.85  | 99.15220  | YES | NO  |
| 52 | eu  | 1059.74 | 14.57832  | YES | NO  |
| 53 | eu  | 1059.74 | 14.57832  | YES | NO  |
| 54 | alg | 1075.24 | 0.00000   | NO  | YES |
| 55 | a2g | 1086.55 | 0.00000   | NO  | NO  |
| 56 | eg  | 1093.96 | 0.00000   | NO  | YES |
| 57 | eg  | 1093.96 | 0.00000   | NO  | YES |
| 58 | alu | 1106.40 | 0.00000   | NO  | NO  |
| 59 | eu  | 1118.87 | 560.70530 | YES | NO  |
| 60 | eu  | 1118.87 | 560.70530 | YES | NO  |
| 61 | eg  | 1123.40 | 0.00000   | NO  | YES |
| 62 | eg  | 1123.40 | 0.00000   | NO  | YES |
| 63 | a2u | 1127.14 | 31.53988  | YES | NO  |
| 64 | eg  | 1146.04 | 0.00000   | NO  | YES |
| 65 | eg  | 1146.04 | 0.00000   | NO  | YES |
| 66 | eu  | 1147.77 | 0.08606   | YES | NO  |
| 67 | eu  | 1147.77 | 0.08606   | YES | NO  |
| 68 | alu | 1153.22 | 0.00000   | NO  | NO  |

---



---

|     |     |         |           |     |     |
|-----|-----|---------|-----------|-----|-----|
| 69  | a1g | 1161.31 | 0.00000   | NO  | YES |
| 70  | a2g | 1253.32 | 0.00000   | NO  | NO  |
| 71  | eu  | 1259.00 | 5.51824   | YES | NO  |
| 72  | eu  | 1259.00 | 5.51824   | YES | NO  |
| 73  | eg  | 1266.82 | 0.00000   | NO  | YES |
| 74  | eg  | 1266.82 | 0.00000   | NO  | YES |
| 75  | a2u | 1269.68 | 49.81741  | YES | NO  |
| 76  | a1u | 1290.15 | 0.00000   | NO  | NO  |
| 77  | eg  | 1298.33 | 0.00000   | NO  | YES |
| 78  | eg  | 1298.33 | 0.00000   | NO  | YES |
| 79  | eu  | 1310.65 | 28.54679  | YES | NO  |
| 80  | eu  | 1310.65 | 28.54679  | YES | NO  |
| 81  | a1g | 1315.95 | 0.00000   | NO  | YES |
| 82  | a2g | 1373.55 | 0.00000   | NO  | NO  |
| 83  | eu  | 1383.21 | 59.45324  | YES | NO  |
| 84  | eu  | 1383.21 | 59.45324  | YES | NO  |
| 85  | eg  | 1397.55 | 0.00000   | NO  | YES |
| 86  | eg  | 1397.55 | 0.00000   | NO  | YES |
| 87  | a1u | 1405.70 | 0.00000   | NO  | NO  |
| 88  | a2u | 1426.52 | 0.44658   | YES | NO  |
| 89  | eg  | 1439.69 | 0.00000   | NO  | YES |
| 90  | eg  | 1439.69 | 0.00000   | NO  | YES |
| 91  | eu  | 1460.77 | 7.56752   | YES | NO  |
| 92  | eu  | 1460.77 | 7.56752   | YES | NO  |
| 93  | a1g | 1471.62 | 0.00000   | NO  | YES |
| 94  | a2g | 1496.41 | 0.00000   | NO  | NO  |
| 95  | eu  | 1497.40 | 23.25032  | YES | NO  |
| 96  | eu  | 1497.40 | 23.25032  | YES | NO  |
| 97  | eg  | 1498.38 | 0.00000   | NO  | YES |
| 98  | eg  | 1498.38 | 0.00000   | NO  | YES |
| 99  | a1u | 1498.70 | 0.00000   | NO  | NO  |
| 100 | eg  | 1514.22 | 0.00000   | NO  | YES |
| 101 | eg  | 1514.22 | 0.00000   | NO  | YES |
| 102 | a2u | 1514.23 | 28.15940  | YES | NO  |
| 103 | eu  | 1514.62 | 1.30397   | YES | NO  |
| 104 | eu  | 1514.62 | 1.30397   | YES | NO  |
| 105 | a1g | 1515.96 | 0.00000   | NO  | YES |
| 106 | a2g | 2993.58 | 0.00000   | NO  | NO  |
| 107 | eu  | 2994.08 | 10.90568  | YES | NO  |
| 108 | eu  | 2994.08 | 10.90568  | YES | NO  |
| 109 | eg  | 2995.14 | 0.00000   | NO  | YES |
| 110 | eg  | 2995.14 | 0.00000   | NO  | YES |
| 111 | a1u | 2995.84 | 0.00000   | NO  | NO  |
| 112 | a2u | 2998.95 | 70.55978  | YES | NO  |
| 113 | eg  | 2999.71 | 0.00000   | NO  | YES |
| 114 | eg  | 2999.71 | 0.00000   | NO  | YES |
| 115 | eu  | 3001.07 | 107.92800 | YES | NO  |
| 116 | eu  | 3001.07 | 107.92800 | YES | NO  |
| 117 | a1g | 3002.54 | 0.00000   | NO  | YES |
| 118 | a1g | 3031.42 | 0.00000   | NO  | YES |
| 119 | eu  | 3031.52 | 102.56802 | YES | NO  |

---

---

|     |     |         |           |     |     |
|-----|-----|---------|-----------|-----|-----|
| 120 | eu  | 3031.52 | 102.56802 | YES | NO  |
| 121 | eg  | 3033.16 | 0.00000   | NO  | YES |
| 122 | eg  | 3033.16 | 0.00000   | NO  | YES |
| 123 | alu | 3034.47 | 0.00000   | NO  | NO  |
| 124 | a2u | 3041.25 | 192.99234 | YES | NO  |
| 125 | eg  | 3042.30 | 0.00000   | NO  | YES |
| 126 | eg  | 3042.30 | 0.00000   | NO  | YES |
| 127 | eu  | 3044.10 | 3.54828   | YES | NO  |
| 128 | eu  | 3044.10 | 3.54828   | YES | NO  |
| 129 | a2g | 3044.81 | 0.00000   | NO  | NO  |

---

### 1.7.In([18]crown-6)<sup>+</sup>

*Optimized atomic coordinates from the DFT (BP86/SV(P)) calculations (Bohr Units):*

---

|                   |                   |                   |    |
|-------------------|-------------------|-------------------|----|
| 0.78803952453644  | 0.05056041318796  | -0.55221034001176 | in |
| 1.61360373228930  | 4.64513256739690  | 2.12092932317478  | o  |
| -1.88684517002701 | 4.54033199529324  | -1.90240843601521 | o  |
| -2.79883169057338 | 0.00402384553155  | -4.55264771607899 | o  |
| -1.49324681505820 | -4.57671519048653 | -2.15888361602512 | o  |
| 1.99769691252603  | -4.59521337316104 | 1.87368020731239  | o  |
| 2.82151124111859  | 0.00012627207745  | 4.44924354214843  | o  |
| -0.00523338890573 | 6.72849575172018  | 1.58260966619717  | c  |
| 2.29366590819877  | 4.48561822810606  | 4.72113862933757  | c  |
| -0.56529522837686 | 6.78764483737982  | -1.22420136765107 | c  |
| -2.72998206723530 | 4.53308183878710  | -4.46097575142180 | c  |
| -4.32153075388524 | 2.19604779367511  | -4.91073486973443 | c  |
| -4.11870044647903 | -2.29024511012393 | -5.04700303639891 | c  |
| -2.32532615516595 | -4.49788286350002 | -4.71951305197196 | c  |
| 0.02210702389565  | -6.73231864861806 | -1.59797890852870 | c  |
| 0.57032486209032  | -6.77970726585143 | 1.21156302433186  | c  |
| 2.66841510542151  | -4.52219866302731 | 4.47990648974939  | c  |
| 4.27634028289743  | -2.20567991578241 | 4.97463719229040  | c  |
| 4.08989564218567  | 2.28761517923833  | 5.09323835523744  | c  |
| 0.92748133134654  | 8.54236986204205  | 2.13043398713276  | h  |
| -1.80422697314045 | 6.56453753904713  | 2.67650943897533  | h  |
| 0.57282698695601  | 4.22716775382288  | 5.91866314438019  | h  |
| 3.25507127091256  | 6.26208227183196  | 5.33730776275692  | h  |
| -1.75010230485926 | 8.48460517308231  | -1.64065089718696 | h  |
| 1.22713816967254  | 6.95828326767236  | -2.32890974621442 | h  |
| -1.08474052134942 | 4.56786252807318  | -5.78587617460206 | h  |
| -3.91115505779747 | 6.24017134390407  | -4.84590946744782 | h  |
| -5.96782412613472 | 2.17386376397794  | -3.58775427434059 | h  |
| -5.07118967968461 | 2.25265671439557  | -6.88399633723553 | h  |
| -4.85601462797896 | -2.29941029624975 | -7.02567545808246 | h  |
| -5.76289033517392 | -2.49107161106380 | -3.73638150889249 | h  |
| -3.34773353973344 | -6.27866276971606 | -5.21107946229652 | h  |
| -0.67973246027592 | -4.30943766986964 | -6.03118168867437 | h  |
| 1.82397622887277  | -6.68197430857598 | -2.69860169970657 | h  |
| -1.00642037186141 | -8.50200688125872 | -2.11580844401838 | h  |
| -1.23770488901688 | -6.83529600684968 | 2.30101912926113  | h  |
| 1.65948127530253  | -8.53180525446362 | 1.66376994478118  | h  |

---

|                  |                   |                  |   |
|------------------|-------------------|------------------|---|
| 3.77661524291391 | -6.24308729528837 | 5.00041003180027 | h |
| 0.93522910612160 | -4.47352372622960 | 5.68552819357149 | h |
| 4.87670347195838 | -2.21869687580135 | 6.99862340424156 | h |
| 6.01712057703581 | -2.25016489190619 | 3.77939008457579 | h |
| 5.81787604766204 | 2.53987822650018  | 3.90417090075313 | h |
| 4.69360665879852 | 2.24294145108013  | 7.11560980052700 | h |

*List of calculated frequencies (BP86/SV(P)):*

| # | mode # | symmetry | wave number<br>cm**(-1) | IR intensity<br>km/mol | IR  | RAMAN |
|---|--------|----------|-------------------------|------------------------|-----|-------|
|   | 1      |          | 0.00                    | 0.00000                | -   | -     |
|   | 2      |          | 0.00                    | 0.00000                | -   | -     |
|   | 3      |          | 0.00                    | 0.00000                | -   | -     |
|   | 4      |          | 0.00                    | 0.00000                | -   | -     |
|   | 5      |          | 0.00                    | 0.00000                | -   | -     |
|   | 6      |          | 0.00                    | 0.00000                | -   | -     |
|   | 7      | a        | 30.63                   | 0.11931                | YES | YES   |
|   | 8      | a        | 33.13                   | 0.06899                | YES | YES   |
|   | 9      | a        | 36.52                   | 1.28216                | YES | YES   |
|   | 10     | a        | 62.67                   | 0.26771                | YES | YES   |
|   | 11     | a        | 66.17                   | 28.07729               | YES | YES   |
|   | 12     | a        | 66.52                   | 28.54174               | YES | YES   |
|   | 13     | a        | 94.69                   | 0.02161                | YES | YES   |
|   | 14     | a        | 95.20                   | 0.02852                | YES | YES   |
|   | 15     | a        | 130.42                  | 14.14921               | YES | YES   |
|   | 16     | a        | 133.59                  | 1.97433                | YES | YES   |
|   | 17     | a        | 136.48                  | 6.29995                | YES | YES   |
|   | 18     | a        | 138.27                  | 7.33903                | YES | YES   |
|   | 19     | a        | 148.69                  | 0.97071                | YES | YES   |
|   | 20     | a        | 149.69                  | 1.61762                | YES | YES   |
|   | 21     | a        | 175.45                  | 0.00661                | YES | YES   |
|   | 22     | a        | 216.85                  | 0.53670                | YES | YES   |
|   | 23     | a        | 243.75                  | 10.53234               | YES | YES   |
|   | 24     | a        | 244.85                  | 13.52389               | YES | YES   |
|   | 25     | a        | 245.49                  | 15.27782               | YES | YES   |
|   | 26     | a        | 253.37                  | 4.99933                | YES | YES   |
|   | 27     | a        | 254.37                  | 4.67565                | YES | YES   |
|   | 28     | a        | 271.18                  | 0.06985                | YES | YES   |
|   | 29     | a        | 308.78                  | 2.96090                | YES | YES   |
|   | 30     | a        | 309.23                  | 2.74087                | YES | YES   |
|   | 31     | a        | 341.54                  | 0.00400                | YES | YES   |
|   | 32     | a        | 353.24                  | 0.02745                | YES | YES   |
|   | 33     | a        | 353.71                  | 0.01555                | YES | YES   |
|   | 34     | a        | 523.02                  | 0.42831                | YES | YES   |
|   | 35     | a        | 523.58                  | 0.41620                | YES | YES   |
|   | 36     | a        | 531.36                  | 0.00146                | YES | YES   |
|   | 37     | a        | 538.67                  | 0.08116                | YES | YES   |
|   | 38     | a        | 539.24                  | 0.10291                | YES | YES   |
|   | 39     | a        | 571.90                  | 0.12130                | YES | YES   |
|   | 40     | a        | 815.46                  | 0.40579                | YES | YES   |
|   | 41     | a        | 816.12                  | 0.06546                | YES | YES   |
|   | 42     | a        | 822.55                  | 20.80967               | YES | YES   |

---

|    |   |         |           |     |     |
|----|---|---------|-----------|-----|-----|
| 43 | a | 828.68  | 49.31510  | YES | YES |
| 44 | a | 830.02  | 50.69298  | YES | YES |
| 45 | a | 872.06  | 1.54026   | YES | YES |
| 46 | a | 917.67  | 0.01895   | YES | YES |
| 47 | a | 922.38  | 0.01833   | YES | YES |
| 48 | a | 949.39  | 0.87258   | YES | YES |
| 49 | a | 949.89  | 0.83507   | YES | YES |
| 50 | a | 958.96  | 90.88336  | YES | YES |
| 51 | a | 959.97  | 92.30039  | YES | YES |
| 52 | a | 1045.59 | 20.64081  | YES | YES |
| 53 | a | 1045.81 | 20.73802  | YES | YES |
| 54 | a | 1063.03 | 0.38225   | YES | YES |
| 55 | a | 1072.13 | 0.02210   | YES | YES |
| 56 | a | 1072.65 | 0.01673   | YES | YES |
| 57 | a | 1078.18 | 0.01401   | YES | YES |
| 58 | a | 1084.20 | 0.04178   | YES | YES |
| 59 | a | 1094.91 | 3.70674   | YES | YES |
| 60 | a | 1095.20 | 3.34818   | YES | YES |
| 61 | a | 1102.67 | 29.21110  | YES | YES |
| 62 | a | 1114.28 | 550.81223 | YES | YES |
| 63 | a | 1114.34 | 552.71686 | YES | YES |
| 64 | a | 1118.36 | 2.04482   | YES | YES |
| 65 | a | 1118.70 | 3.75126   | YES | YES |
| 66 | a | 1132.68 | 0.53349   | YES | YES |
| 67 | a | 1141.18 | 0.98588   | YES | YES |
| 68 | a | 1141.42 | 1.17962   | YES | YES |
| 69 | a | 1149.61 | 0.00717   | YES | YES |
| 70 | a | 1216.72 | 0.23299   | YES | YES |
| 71 | a | 1222.96 | 7.23853   | YES | YES |
| 72 | a | 1224.01 | 7.15199   | YES | YES |
| 73 | a | 1231.81 | 2.13662   | YES | YES |
| 74 | a | 1232.80 | 0.35905   | YES | YES |
| 75 | a | 1235.73 | 48.94961  | YES | YES |
| 76 | a | 1256.00 | 0.08385   | YES | YES |
| 77 | a | 1263.37 | 0.13646   | YES | YES |
| 78 | a | 1264.25 | 0.01780   | YES | YES |
| 79 | a | 1274.72 | 30.58923  | YES | YES |
| 80 | a | 1276.00 | 29.90025  | YES | YES |
| 81 | a | 1280.56 | 0.36529   | YES | YES |
| 82 | a | 1325.91 | 0.16669   | YES | YES |
| 83 | a | 1336.22 | 69.02594  | YES | YES |
| 84 | a | 1337.66 | 68.76286  | YES | YES |
| 85 | a | 1355.00 | 0.10386   | YES | YES |
| 86 | a | 1355.09 | 0.02178   | YES | YES |
| 87 | a | 1370.85 | 0.03970   | YES | YES |
| 88 | a | 1377.64 | 0.19512   | YES | YES |
| 89 | a | 1397.99 | 0.04492   | YES | YES |
| 90 | a | 1399.05 | 0.01064   | YES | YES |
| 91 | a | 1420.79 | 33.55776  | YES | YES |
| 92 | a | 1422.91 | 32.67911  | YES | YES |
| 93 | a | 1432.63 | 0.15270   | YES | YES |

---

|     |   |         |           |     |     |
|-----|---|---------|-----------|-----|-----|
| 94  | a | 1436.83 | 3.21947   | YES | YES |
| 95  | a | 1438.93 | 17.20924  | YES | YES |
| 96  | a | 1439.22 | 22.97410  | YES | YES |
| 97  | a | 1441.28 | 3.08585   | YES | YES |
| 98  | a | 1442.08 | 0.22042   | YES | YES |
| 99  | a | 1442.97 | 0.11305   | YES | YES |
| 100 | a | 1463.03 | 26.22284  | YES | YES |
| 101 | a | 1464.62 | 8.25195   | YES | YES |
| 102 | a | 1465.21 | 0.67814   | YES | YES |
| 103 | a | 1467.50 | 1.12412   | YES | YES |
| 104 | a | 1467.81 | 0.65388   | YES | YES |
| 105 | a | 1471.51 | 0.21573   | YES | YES |
| 106 | a | 2906.71 | 0.37936   | YES | YES |
| 107 | a | 2907.00 | 18.25365  | YES | YES |
| 108 | a | 2907.35 | 8.93365   | YES | YES |
| 109 | a | 2907.89 | 0.53436   | YES | YES |
| 110 | a | 2908.32 | 1.94056   | YES | YES |
| 111 | a | 2908.87 | 3.10010   | YES | YES |
| 112 | a | 2910.95 | 74.61095  | YES | YES |
| 113 | a | 2911.38 | 1.15660   | YES | YES |
| 114 | a | 2912.12 | 17.46774  | YES | YES |
| 115 | a | 2913.01 | 124.15699 | YES | YES |
| 116 | a | 2913.18 | 109.06526 | YES | YES |
| 117 | a | 2914.72 | 12.26040  | YES | YES |
| 118 | a | 2952.29 | 4.43461   | YES | YES |
| 119 | a | 2952.75 | 97.32990  | YES | YES |
| 120 | a | 2953.03 | 102.31843 | YES | YES |
| 121 | a | 2955.83 | 0.83282   | YES | YES |
| 122 | a | 2956.46 | 1.20050   | YES | YES |
| 123 | a | 2959.75 | 0.07969   | YES | YES |
| 124 | a | 2962.13 | 187.82077 | YES | YES |
| 125 | a | 2964.96 | 1.05167   | YES | YES |
| 126 | a | 2965.81 | 1.49339   | YES | YES |
| 127 | a | 2968.41 | 3.21773   | YES | YES |
| 128 | a | 2968.63 | 1.32163   | YES | YES |
| 129 | a | 2969.74 | 0.28783   | YES | YES |

*Optimized atomic coordinates from the DFT (B3LYP/TZVPP) calculations (Bohr Units):*

|                    |                    |                    |    |
|--------------------|--------------------|--------------------|----|
| 0.0000000000000000 | 0.0000000000000000 | 0.0000000000000000 | in |
| -4.65846957903170  | -2.68956866546562  | 0.35576015464098   | o  |
| -4.65846957903170  | 2.68956866546562   | -0.35576015464098  | o  |
| 0.0000000000000000 | 5.37913733093126   | 0.35576015464098   | o  |
| 4.65846957903170   | 2.68956866546562   | -0.35576015464098  | o  |
| 4.65846957903170   | -2.68956866546562  | 0.35576015464098   | o  |
| 0.0000000000000000 | -5.37913733093126  | -0.35576015464098  | o  |
| -6.78715598561840  | -1.31310859421022  | -0.55906432064151  | c  |
| -4.53076339332291  | -5.22129520588805  | -0.55906432064151  | c  |
| -6.78715598561840  | 1.31310859421022   | 0.55906432064151   | c  |
| -4.53076339332291  | 5.22129520588805   | 0.55906432064151   | c  |
| -2.25639259229549  | 6.53440380009821   | -0.55906432064151  | c  |
| 2.25639259229549   | 6.53440380009821   | -0.55906432064151  | c  |

|                   |                   |                   |   |
|-------------------|-------------------|-------------------|---|
| 4.53076339332291  | 5.22129520588804  | 0.55906432064151  | c |
| 6.78715598561840  | 1.31310859421022  | 0.55906432064151  | c |
| 6.78715598561840  | -1.31310859421022 | -0.55906432064151 | c |
| 4.53076339332291  | -5.22129520588804 | -0.55906432064151 | c |
| 2.25639259229549  | -6.53440380009821 | 0.55906432064151  | c |
| -2.25639259229549 | -6.53440380009821 | 0.55906432064151  | c |
| -8.53720080320252 | -2.26982433573497 | -0.00310290748019 | h |
| -6.73488241381639 | -1.20963878252725 | -2.62659370156978 | h |
| -4.41501912197967 | -5.22775987060242 | -2.62659370156978 | h |
| -6.23432593847588 | -6.25852060491482 | -0.00310290748019 | h |
| -8.53720080320252 | 2.26982433573497  | 0.00310290748019  | h |
| -6.73488241381639 | 1.20963878252725  | 2.62659370156978  | h |
| -4.41501912197967 | 5.22775987060242  | 2.62659370156978  | h |
| -6.23432593847588 | 6.25852060491482  | 0.00310290748019  | h |
| -2.31986329183673 | 6.43739865312969  | -2.62659370156978 | h |
| -2.30287486472661 | 8.52834494064981  | -0.00310290748019 | h |
| 2.30287486472662  | 8.52834494064981  | -0.00310290748019 | h |
| 2.31986329183673  | 6.43739865312969  | -2.62659370156978 | h |
| 6.23432593847588  | 6.25852060491481  | 0.00310290748019  | h |
| 4.41501912197967  | 5.22775987060242  | 2.62659370156978  | h |
| 6.73488241381639  | 1.20963878252725  | 2.62659370156978  | h |
| 8.53720080320252  | 2.26982433573497  | 0.00310290748019  | h |
| 6.73488241381639  | -1.20963878252725 | -2.62659370156978 | h |
| 8.53720080320252  | -2.26982433573497 | -0.00310290748019 | h |
| 6.23432593847588  | -6.25852060491481 | -0.00310290748019 | h |
| 4.41501912197967  | -5.22775987060242 | -2.62659370156978 | h |
| 2.30287486472662  | -8.52834494064981 | 0.00310290748019  | h |
| 2.31986329183673  | -6.43739865312969 | 2.62659370156978  | h |
| -2.31986329183673 | -6.43739865312969 | 2.62659370156978  | h |
| -2.30287486472661 | -8.52834494064981 | 0.00310290748019  | h |

*List of calculated frequencies (B3LYP/TZVPP):*

The B3LYP/TZVPP calculation was performed on the basis of BP86/SV(P) optimized coordinates. It shows one imaginary frequency, probably because of symmetry restraints. Due to the low frequency and flat potential energy surface, the impact on the reported reaction enthalpies may be neglected. Further calculations to find the minimum were futile.

| # mode # | symmetry | wave number<br>cm <sup>**</sup> (-1) | IR intensity<br>km/mol | selection rules<br>IR RAMAN |
|----------|----------|--------------------------------------|------------------------|-----------------------------|
| 1        | a2u      | -36.50                               | 0.00000                | YES NO                      |
| 2        |          | 0.00                                 | 0.00000                | - -                         |
| 3        |          | 0.00                                 | 0.00000                | - -                         |
| 4        |          | 0.00                                 | 0.00000                | - -                         |
| 5        |          | 0.00                                 | 0.00000                | - -                         |
| 6        |          | 0.00                                 | 0.00000                | - -                         |
| 7        |          | 0.00                                 | 0.00000                | - -                         |
| 8        | eu       | 44.79                                | 0.00837                | YES NO                      |
| 9        | eu       | 44.79                                | 0.00837                | YES NO                      |
| 10       | a2g      | 76.21                                | 0.00000                | NO NO                       |
| 11       | eu       | 77.84                                | 23.93524               | YES NO                      |
| 12       | eu       | 77.84                                | 23.93524               | YES NO                      |

---

|    |     |         |           |     |     |
|----|-----|---------|-----------|-----|-----|
| 13 | eg  | 100.32  | 0.00000   | NO  | YES |
| 14 | eg  | 100.32  | 0.00000   | NO  | YES |
| 15 | a2u | 128.34  | 19.31148  | YES | NO  |
| 16 | eg  | 146.78  | 0.00000   | NO  | YES |
| 17 | eg  | 146.78  | 0.00000   | NO  | YES |
| 18 | a1g | 148.36  | 0.00000   | NO  | YES |
| 19 | eu  | 148.46  | 14.96863  | YES | NO  |
| 20 | eu  | 148.46  | 14.96863  | YES | NO  |
| 21 | alu | 169.17  | 0.00000   | NO  | NO  |
| 22 | a2u | 221.38  | 0.90470   | YES | NO  |
| 23 | eu  | 238.20  | 22.81456  | YES | NO  |
| 24 | eu  | 238.20  | 22.81456  | YES | NO  |
| 25 | a1g | 239.18  | 0.00000   | NO  | YES |
| 26 | eg  | 249.81  | 0.00000   | NO  | YES |
| 27 | eg  | 249.81  | 0.00000   | NO  | YES |
| 28 | a1g | 266.51  | 0.00000   | NO  | YES |
| 29 | eu  | 309.53  | 3.54561   | YES | NO  |
| 30 | eu  | 309.53  | 3.54561   | YES | NO  |
| 31 | alu | 348.76  | 0.00000   | NO  | NO  |
| 32 | eg  | 356.13  | 0.00000   | NO  | YES |
| 33 | eg  | 356.13  | 0.00000   | NO  | YES |
| 34 | eu  | 525.43  | 1.07548   | YES | NO  |
| 35 | eu  | 525.43  | 1.07548   | YES | NO  |
| 36 | a2g | 533.25  | 0.00000   | NO  | NO  |
| 37 | eg  | 542.99  | 0.00000   | NO  | YES |
| 38 | eg  | 542.99  | 0.00000   | NO  | YES |
| 39 | a2u | 577.52  | 0.00442   | YES | NO  |
| 40 | eg  | 829.92  | 0.00000   | NO  | YES |
| 41 | eg  | 829.92  | 0.00000   | NO  | YES |
| 42 | a2u | 835.86  | 25.56906  | YES | NO  |
| 43 | eu  | 839.71  | 49.61404  | YES | NO  |
| 44 | eu  | 839.71  | 49.61404  | YES | NO  |
| 45 | a1g | 871.81  | 0.00000   | NO  | YES |
| 46 | alu | 923.29  | 0.00000   | NO  | NO  |
| 47 | a2g | 942.14  | 0.00000   | NO  | NO  |
| 48 | eg  | 951.50  | 0.00000   | NO  | YES |
| 49 | eg  | 951.50  | 0.00000   | NO  | YES |
| 50 | eu  | 970.65  | 99.68656  | YES | NO  |
| 51 | eu  | 970.65  | 99.68656  | YES | NO  |
| 52 | eu  | 1055.79 | 22.14738  | YES | NO  |
| 53 | eu  | 1055.79 | 22.14738  | YES | NO  |
| 54 | a1g | 1068.78 | 0.00000   | NO  | YES |
| 55 | a2g | 1083.11 | 0.00000   | NO  | NO  |
| 56 | eg  | 1089.91 | 0.00000   | NO  | YES |
| 57 | eg  | 1089.91 | 0.00000   | NO  | YES |
| 58 | alu | 1101.40 | 0.00000   | NO  | NO  |
| 59 | eu  | 1113.40 | 553.81575 | YES | NO  |
| 60 | eu  | 1113.40 | 553.81575 | YES | NO  |
| 61 | eg  | 1119.35 | 0.00000   | NO  | YES |
| 62 | eg  | 1119.35 | 0.00000   | NO  | YES |
| 63 | a2u | 1123.28 | 31.61281  | YES | NO  |

---

---

|     |     |         |          |     |     |
|-----|-----|---------|----------|-----|-----|
| 64  | eg  | 1141.25 | 0.00000  | NO  | YES |
| 65  | eg  | 1141.25 | 0.00000  | NO  | YES |
| 66  | alu | 1146.17 | 0.00000  | NO  | NO  |
| 67  | eu  | 1147.21 | 0.36410  | YES | NO  |
| 68  | eu  | 1147.21 | 0.36410  | YES | NO  |
| 69  | alg | 1161.11 | 0.00000  | NO  | YES |
| 70  | a2g | 1253.06 | 0.00000  | NO  | NO  |
| 71  | eu  | 1259.42 | 3.35599  | YES | NO  |
| 72  | eu  | 1259.42 | 3.35599  | YES | NO  |
| 73  | eg  | 1268.60 | 0.00000  | NO  | YES |
| 74  | eg  | 1268.60 | 0.00000  | NO  | YES |
| 75  | a2u | 1272.17 | 48.77803 | YES | NO  |
| 76  | alu | 1294.00 | 0.00000  | NO  | NO  |
| 77  | eg  | 1301.82 | 0.00000  | NO  | YES |
| 78  | eg  | 1301.82 | 0.00000  | NO  | YES |
| 79  | eu  | 1314.04 | 31.44749 | YES | NO  |
| 80  | eu  | 1314.04 | 31.44749 | YES | NO  |
| 81  | alg | 1319.48 | 0.00000  | NO  | YES |
| 82  | a2g | 1374.70 | 0.00000  | NO  | NO  |
| 83  | eu  | 1384.06 | 57.92388 | YES | NO  |
| 84  | eu  | 1384.06 | 57.92388 | YES | NO  |
| 85  | eg  | 1397.59 | 0.00000  | NO  | YES |
| 86  | eg  | 1397.59 | 0.00000  | NO  | YES |
| 87  | alu | 1404.03 | 0.00000  | NO  | NO  |
| 88  | a2u | 1428.63 | 0.32421  | YES | NO  |
| 89  | eg  | 1439.84 | 0.00000  | NO  | YES |
| 90  | eg  | 1439.84 | 0.00000  | NO  | YES |
| 91  | eu  | 1459.31 | 7.06768  | YES | NO  |
| 92  | eu  | 1459.31 | 7.06768  | YES | NO  |
| 93  | alg | 1469.56 | 0.00000  | NO  | YES |
| 94  | a2g | 1495.77 | 0.00000  | NO  | NO  |
| 95  | eu  | 1496.54 | 23.74312 | YES | NO  |
| 96  | eu  | 1496.54 | 23.74312 | YES | NO  |
| 97  | eg  | 1497.31 | 0.00000  | NO  | YES |
| 98  | eg  | 1497.31 | 0.00000  | NO  | YES |
| 99  | alu | 1497.53 | 0.00000  | NO  | NO  |
| 100 | a2u | 1513.83 | 31.46685 | YES | NO  |
| 101 | eg  | 1513.95 | 0.00000  | NO  | YES |
| 102 | eg  | 1513.95 | 0.00000  | NO  | YES |
| 103 | eu  | 1514.29 | 1.39265  | YES | NO  |
| 104 | eu  | 1514.29 | 1.39265  | YES | NO  |
| 105 | alg | 1515.58 | 0.00000  | NO  | YES |
| 106 | a2g | 2994.39 | 0.00000  | NO  | NO  |
| 107 | eu  | 2994.86 | 9.83643  | YES | NO  |
| 108 | eu  | 2994.86 | 9.83643  | YES | NO  |
| 109 | eg  | 2995.91 | 0.00000  | NO  | YES |
| 110 | eg  | 2995.91 | 0.00000  | NO  | YES |
| 111 | alu | 2996.71 | 0.00000  | NO  | NO  |
| 112 | a2u | 2999.15 | 65.90505 | YES | NO  |
| 113 | eg  | 3000.10 | 0.00000  | NO  | YES |
| 114 | eg  | 3000.10 | 0.00000  | NO  | YES |

---



|     |     |         |           |     |     |
|-----|-----|---------|-----------|-----|-----|
| 115 | eu  | 3001.56 | 105.61880 | YES | NO  |
| 116 | eu  | 3001.56 | 105.61880 | YES | NO  |
| 117 | alg | 3002.95 | 0.00000   | NO  | YES |
| 118 | alg | 3032.10 | 0.00000   | NO  | YES |
| 119 | eu  | 3032.25 | 107.14525 | YES | NO  |
| 120 | eu  | 3032.25 | 107.14525 | YES | NO  |
| 121 | eg  | 3034.10 | 0.00000   | NO  | YES |
| 122 | eg  | 3034.10 | 0.00000   | NO  | YES |
| 123 | alu | 3035.69 | 0.00000   | NO  | NO  |
| 124 | a2u | 3041.05 | 181.99006 | YES | NO  |
| 125 | eg  | 3042.43 | 0.00000   | NO  | YES |
| 126 | eg  | 3042.43 | 0.00000   | NO  | YES |
| 127 | eu  | 3044.43 | 1.96090   | YES | NO  |
| 128 | eu  | 3044.43 | 1.96090   | YES | NO  |
| 129 | a2g | 3045.21 | 0.00000   | NO  | NO  |

### 1.8.Ga([18]crown-6)(PhF)<sub>2</sub><sup>+</sup>

*Atomic coordinates from the DFT (BP86/SV(P)) calculations (Bohr Units):*

|                   |                   |                   |    |
|-------------------|-------------------|-------------------|----|
| -0.29979856261071 | 0.44990740608186  | -0.29158304879446 | ga |
| 2.53887243330966  | -0.75615360141155 | -4.66197155532837 | o  |
| 4.47814717730059  | 2.09130462099004  | -0.67404471923190 | o  |
| 1.49969313991444  | 3.27361177109228  | 3.46908532351028  | o  |
| -2.86655686640575 | 0.44542875516562  | 4.25413424761638  | o  |
| 2.00228470011773  | -2.96091596870282 | -6.03606700985621 | c  |
| 5.07987377002105  | -0.08811651896507 | -4.54919270018876 | c  |
| 5.47754773576470  | 2.23853318338828  | -3.16307858750596 | c  |
| 5.03334871282370  | 4.19218874319041  | 0.88828635460654  | c  |
| 4.13792088575674  | 3.74921804223067  | 3.43129080101041  | c  |
| 0.45561945585548  | 2.97405238575830  | 5.88313485914460  | c  |
| -2.25572179376282 | 2.53416193838229  | 5.76759700386250  | c  |
| -5.42855306036581 | -0.18120442788225 | 4.16932333912666  | c  |
| -0.74305272248920 | -3.39740490905384 | -6.22706162930931 | c  |
| 2.80579624846501  | -4.42624740054535 | -5.19504439792782 | h  |
| 2.72720253892652  | -2.81215672814334 | -7.75428159174538 | h  |
| 5.73991731095881  | 0.11255349824799  | -6.28817537219160 | h  |
| 6.04102627171529  | -1.46563237777914 | -3.72540439052032 | h  |
| 7.31113009758473  | 2.59867718828957  | -3.07273078147002 | h  |
| 4.65687747420248  | 3.65015859875849  | -4.07628873740912 | h  |
| 4.21460597190898  | 5.72405743189396  | 0.19328288035639  | h  |
| 6.88138747949993  | 4.48194044993567  | 0.91587635603145  | h  |
| 5.04274065166492  | 2.28311182267689  | 4.16063059895170  | h  |
| 4.51350395309922  | 5.24503075646934  | 4.49029332145683  | h  |
| 0.78991200736685  | 4.51089105417057  | 6.89623593201492  | h  |
| 1.28042821763143  | 1.52894102345320  | 6.73836821153296  | h  |
| -2.90639229312061 | 2.25006051275075  | 7.49849164805037  | h  |
| -3.09661212486247 | 4.05762134582962  | 5.08058707112107  | h  |
| -6.38208996577632 | 1.22734073390422  | 3.39041602492681  | h  |
| -6.06472936034490 | -0.41180770691522 | 5.91352165523450  | h  |

---

|                   |                   |                   |   |
|-------------------|-------------------|-------------------|---|
| -5.87845905620428 | -2.50246841077939 | 2.71790029156409  | c |
| -1.53883529098525 | -1.97549938356368 | -7.14620551924495 | h |
| -1.05992199912813 | -4.96531067496102 | -7.19722812461978 | h |
| -1.83608921044675 | -3.61385413941061 | -3.80407368910378 | o |
| -5.03528215649339 | -3.93548552588452 | 3.57547690434743  | h |
| -7.71515946613055 | -2.85630073042319 | 2.68023804989296  | h |
| -4.98214305785857 | -2.32559004547998 | 0.24789596536871  | o |
| -4.45313312642787 | -4.10644904841270 | -3.84268079383740 | c |
| -5.41853751190334 | -4.46150969003773 | -1.24438296101622 | c |
| -4.78566823264299 | -5.64719944990371 | -4.85045283903524 | h |
| -5.34757829590983 | -2.67719248829628 | -4.65337330145965 | h |
| -7.25589932597336 | -4.80799097505531 | -1.30802893690601 | h |
| -4.57832748220869 | -5.94186444457397 | -0.46808346886885 | h |
| 5.85537957719591  | -4.04505184661165 | 4.98908653214889  | c |
| 5.74921476349378  | -4.45060597029653 | 2.39607993247768  | c |
| 3.64585510006966  | -4.04284086704540 | 6.40959366030656  | c |
| 7.97113584399999  | -3.54657988936085 | 6.16721738751489  | f |
| 7.25933270449865  | -4.45211775119651 | 1.42523313576221  | h |
| 3.43360106171038  | -4.85393021715391 | 1.22348597465792  | c |
| 1.33024139828626  | -4.44614621664154 | 5.23705639427055  | c |
| 3.71838278874691  | -3.76565583903135 | 8.18183551210931  | h |
| 1.22415217362912  | -4.85171923758766 | 2.64397420555434  | c |
| -0.17983874819611 | -4.44465333300279 | 6.20790319098599  | h |
| -0.35847455879176 | -5.12737358744048 | 1.84256025320582  | h |
| 3.36107337303313  | -5.13111524516797 | -0.54869918536109 | h |
| -3.38279224923150 | 3.46451190423912  | -5.22677289956646 | c |
| -5.18345558195414 | 3.63948164615228  | -3.32236360258167 | c |
| -4.75736013529058 | 5.19771201429949  | -1.25112928328245 | c |
| -2.53062025316564 | 6.58093484601105  | -1.08422867192301 | c |
| -0.72995692044300 | 6.40596510409789  | -2.98858127712406 | c |
| -1.15595788080030 | 4.84777253047319  | -5.05981559642328 | c |
| -3.98298816379071 | 1.98213514274915  | -7.08450596126391 | f |
| -6.70532761945648 | 2.69412725486299  | -3.43642747148628 | h |
| -5.98808206871516 | 5.31729388348909  | 0.05036289352314  | h |
| -2.23945125182662 | 7.64589000375119  | 0.33138406557092  | h |
| 0.79193401432059  | 7.35135728990970  | -2.87451740821945 | h |
| 0.07470736084052  | 4.72817176402233  | -6.36136446501261 | h |

---

## 2. Crystal Structure Data

Crystal structures containing the  $[Al(OC(CF_3)_3)_4]^-$  anion are commonly severely disordered.<sup>[1, 2]</sup> As a consequence, the crystals do not scatter well and only sparse high angle data can be recorded. This results in poor data quality, which however in most cases does not affect the cationic part of the structures.

Both structures presented herein are highly disordered. Disorder in the anions, solvent molecules and one of two independent crown ether ligands was resolved in each case. While we were able to refine the structure containing the indium crown ether complex (**2**) to  $R1(wR2) (I>2\sigma(I))/(all reflections)$  of 5.39(13.64)/7.61(15.19), the homologous gallium structure (**1**) was impossible to refine further than 7.19(18.61)/9.49(20.49). We do however note that both structures are perfectly isostructural and deduce the credibility of the gallium structure from the homologous indium structure. Both substances crystallized in the same space group and similar parameters, with a slightly larger cell volume for the indium structure. The following table gives the crystallographic positions of all metal atoms: aluminium at the centre of the anions, as well as gallium and indium. The positions can be translated from **1** to **2** a via simple mathematical relationship.

| <b>1</b> |         |        |        | <b>2</b> |         |        |        |
|----------|---------|--------|--------|----------|---------|--------|--------|
| a        | 19.7737 |        |        | a        | 19.7449 |        |        |
| b        | 15.9218 |        |        | b        | 15.9218 |        |        |
| c        | 35.5352 |        |        | c        | 35.6744 |        |        |
| Al1      | 0.4096  | 0.2749 | 0.8201 | Al1      | 0.4086  | 0.7274 | 0.3193 |
|          | 0.0904  | 0.7749 | 0.6799 |          | 0.0914  | 0.2274 | 0.1807 |
|          | 0.5904  | 0.7251 | 0.1799 |          | 0.5914  | 0.2726 | 0.6807 |
|          | 0.9096  | 0.2251 | 0.3201 |          | 0.9086  | 0.7726 | 0.8193 |
| Al2      | 0.7556  | 0.8061 | 0.9352 | Al2      | 0.7556  | 0.195  | 0.435  |
|          | 0.7444  | 0.3061 | 0.5648 |          | 0.7444  | 0.695  | 0.065  |
|          | 0.2444  | 0.1939 | 0.0648 |          | 0.2444  | 0.805  | 0.565  |
|          | 0.2556  | 0.6939 | 0.4352 |          | 0.2556  | 0.305  | 0.935  |
| Ga1      | 0.617   | 0.7873 | 0.6779 | In1      | 0.6117  | 0.2119 | 0.1763 |
|          | 0.883   | 0.2873 | 0.8221 |          | 0.8883  | 0.7119 | 0.3237 |
|          | 0.383   | 0.2127 | 0.3221 |          | 0.3883  | 0.7881 | 0.8237 |
|          | 0.117   | 0.7127 | 0.1779 |          | 0.1117  | 0.2881 | 0.6763 |
| Ga2      | 0.2253  | 0.2449 | 0.5934 | In2      | 0.2181  | 0.7548 | 0.0945 |
|          | 0.2747  | 0.7449 | 0.9066 |          | 0.2819  | 0.2548 | 0.4055 |
|          | 0.7747  | 0.7551 | 0.4066 |          | 0.7819  | 0.2452 | 0.9055 |
|          | 0.7253  | 0.2551 | 0.0934 |          | 0.7181  | 0.7452 | 0.5945 |

## 2.1. [Ga([18]crown-6)(PhF)<sub>2</sub>]<sub>4</sub>[Al(OC(CF<sub>3</sub>)<sub>3</sub>)<sub>4</sub>]<sub>4</sub>•PhF (1)

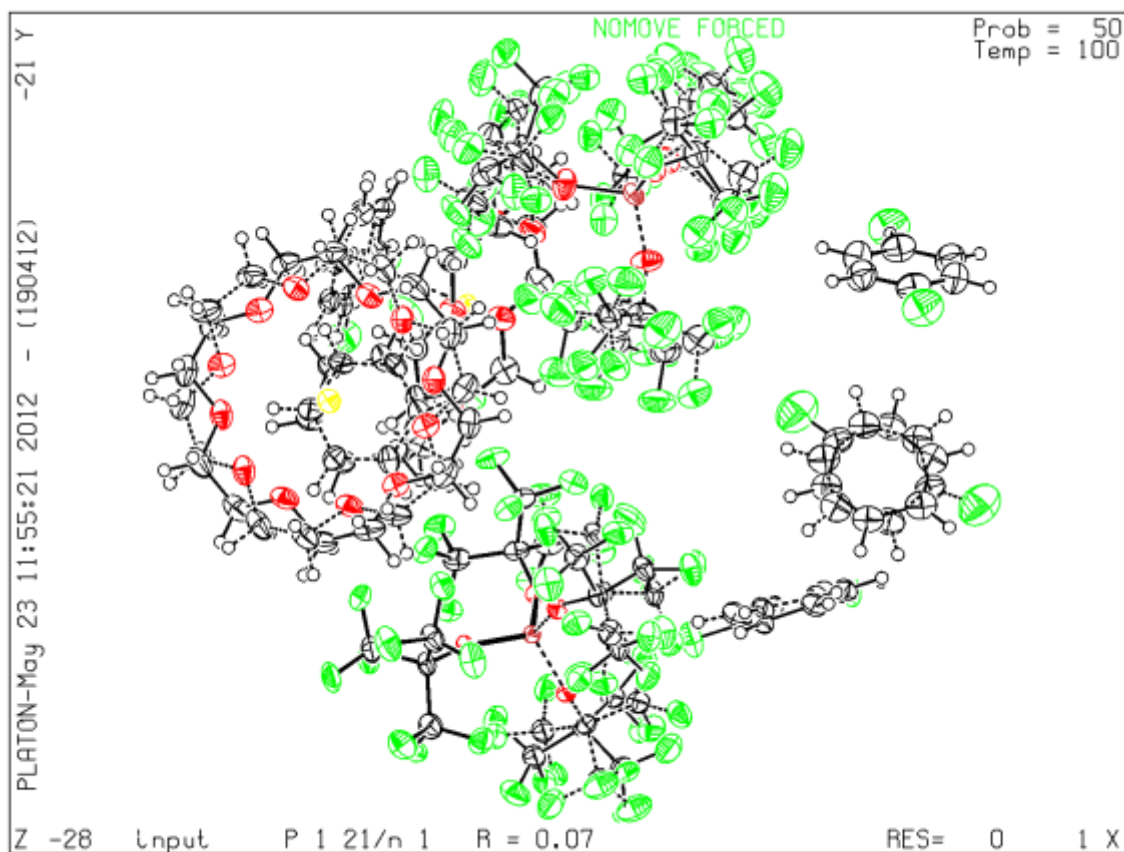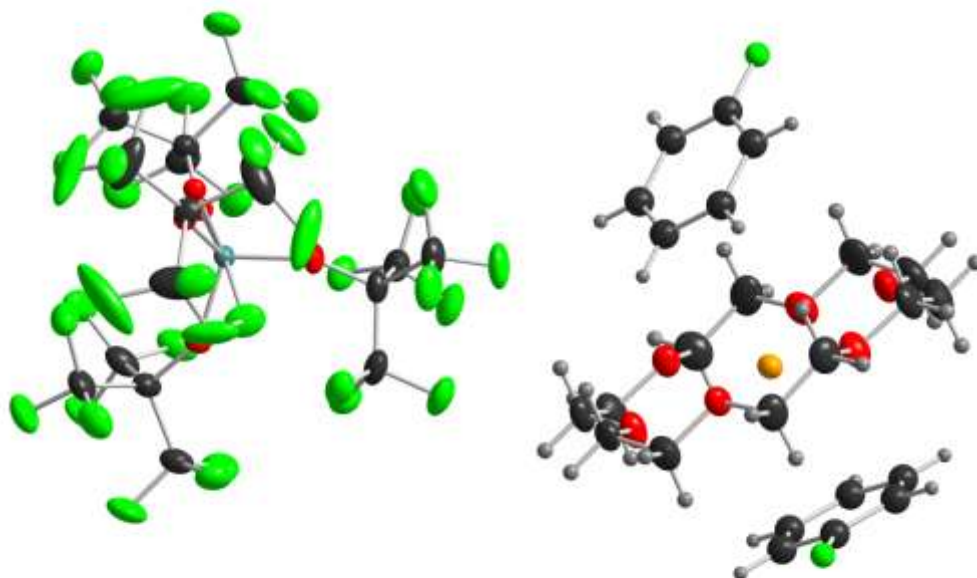

### 2.1.1. Crystal data and structure refinement for CCDC 864619

|                                             |                                                                                                    |
|---------------------------------------------|----------------------------------------------------------------------------------------------------|
| Identification code                         | CCDC 864619                                                                                        |
| Empirical formula                           | C <sub>166</sub> H <sub>141</sub> Al <sub>4</sub> F <sub>153</sub> Ga <sub>4</sub> O <sub>40</sub> |
| Formula weight                              | 6069.88                                                                                            |
| Temperature/K                               | 100(2)                                                                                             |
| Crystal system                              | monoclinic                                                                                         |
| Space group                                 | P2 <sub>1</sub> /n                                                                                 |
| a/Å                                         | 19.7737(7)                                                                                         |
| b/Å                                         | 15.8400(6)                                                                                         |
| c/Å                                         | 35.5352(12)                                                                                        |
| $\alpha$ /°                                 | 90.00                                                                                              |
| $\beta$ /°                                  | 96.0003(17)                                                                                        |
| $\gamma$ /°                                 | 90.00                                                                                              |
| Volume/Å <sup>3</sup>                       | 11069.2(7)                                                                                         |
| Z                                           | 2                                                                                                  |
| $\rho_{\text{calc}}$ /mg/mm <sup>3</sup>    | 1.821                                                                                              |
| m/mm <sup>-1</sup>                          | 0.695                                                                                              |
| F(000)                                      | 640.0                                                                                              |
| Crystal size/mm <sup>3</sup>                | 0.2 × 0.15 × 0.1                                                                                   |
| 2 $\theta$ range for data collection        | 3.3 to 52.8°                                                                                       |
| Index ranges                                | -24 ≤ h ≤ 24, -19 ≤ k ≤ 19, -42 ≤ l ≤ 44                                                           |
| Reflections collected                       | 99060                                                                                              |
| Independent reflections                     | 22436[R(int) = 0.0364]                                                                             |
| Data/restraints/parameters                  | 22436/7127/1980                                                                                    |
| Goodness-of-fit on F <sup>2</sup>           | 1.027                                                                                              |
| Final R indexes [I ≥ 2 $\sigma$ (I)]        | R <sub>1</sub> = 0.0719, wR <sub>2</sub> = 0.1861                                                  |
| Final R indexes [all data]                  | R <sub>1</sub> = 0.0949, wR <sub>2</sub> = 0.2049                                                  |
| Largest diff. peak/hole / e Å <sup>-3</sup> | 1.15/-1.49                                                                                         |

### 2.1.2. Fractional Atomic Coordinates and Equivalent Isotropic Displacement Parameters

| Atom | x          | y          | z           | U(eq)     |
|------|------------|------------|-------------|-----------|
| Ga1  | 6170.2(2)  | 7872.6(3)  | 6779.23(14) | 26.17(12) |
| Ga2  | 2746.6(3)  | 7448.5(3)  | 9065.85(14) | 30.94(13) |
| Al1  | 4096.1(6)  | 2749.0(7)  | 8201.4(3)   | 17.9(2)   |
| O1   | 3263.6(13) | 3085.7(18) | 8111.4(8)   | 24.0(6)   |
| C1   | 2635(2)    | 3111(3)    | 8230.8(11)  | 27.4(9)   |
| C2   | 2197(2)    | 3738(3)    | 7974.3(13)  | 36.2(11)  |
| C3   | 2301(2)    | 2221(3)    | 8195.5(14)  | 38.9(11)  |
| C4   | 2664(2)    | 3405(3)    | 8650.6(13)  | 38.2(11)  |
| F1   | 2295.0(15) | 3639(2)    | 7613.0(8)   | 42.3(7)   |
| F2   | 1529.0(14) | 3644(2)    | 8001.2(9)   | 48.1(8)   |
| F3   | 2357.7(15) | 4534.9(18) | 8069.6(9)   | 45.2(7)   |
| F4   | 1751.6(15) | 2162(2)    | 8383.4(10)  | 51.5(8)   |

|      |            |            |            |          |
|------|------------|------------|------------|----------|
| F5   | 2742.6(15) | 1636.2(18) | 8337(1)    | 46.7(8)  |
| F6   | 2117.4(15) | 2028.8(19) | 7838.0(9)  | 44.7(7)  |
| F7   | 2052.4(15) | 3650(2)    | 8739.3(9)  | 53.2(9)  |
| F8   | 2878.1(16) | 2791(2)    | 8885.1(8)  | 48.8(8)  |
| F9   | 3082.7(14) | 4058(2)    | 8710.5(8)  | 44.2(7)  |
| O2   | 4573.5(15) | 3297.8(17) | 7900.9(8)  | 26.3(6)  |
| C5   | 4686(2)    | 4049(3)    | 7739.3(11) | 28.7(9)  |
| C6   | 4033(3)    | 4380(3)    | 7507.8(13) | 36.9(11) |
| C7   | 5252(3)    | 3918(3)    | 7472.2(13) | 38.7(11) |
| C8   | 4935(2)    | 4708(3)    | 8048.6(12) | 32.7(10) |
| F10  | 3609.8(15) | 4735.9(18) | 7727.7(9)  | 42.9(7)  |
| F11  | 4164.7(17) | 4964.5(19) | 7249.1(8)  | 48.4(8)  |
| F12  | 3700.9(16) | 3753.3(18) | 7318.0(8)  | 42.6(7)  |
| F13  | 4998.9(17) | 3536.7(19) | 7151.7(8)  | 47.4(8)  |
| F14  | 5526.7(17) | 4645.2(19) | 7375.7(9)  | 50.0(8)  |
| F15  | 5748.1(15) | 3435(2)    | 7631.8(9)  | 45.2(7)  |
| F16  | 4902.9(17) | 5501.4(17) | 7917.6(8)  | 45.2(7)  |
| F17  | 5576.9(15) | 4556.9(19) | 8185.3(8)  | 42.8(7)  |
| F18  | 4559.1(15) | 4666.3(17) | 8335.8(7)  | 36.0(6)  |
| O3   | 4349(4)    | 2941(5)    | 8668.1(16) | 22.8(7)  |
| C9   | 4728(4)    | 2756(5)    | 8997(2)    | 26.2(10) |
| C10  | 4577(4)    | 3439(5)    | 9294.9(19) | 37.5(15) |
| C11  | 4567(4)    | 1871(4)    | 9153.5(19) | 31.0(14) |
| C12  | 5485(3)    | 2798(5)    | 8931.3(19) | 34.9(14) |
| F19  | 4537(3)    | 4199(3)    | 9137.2(15) | 40.3(11) |
| F20  | 3994(3)    | 3265(4)    | 9441.1(13) | 50.2(12) |
| F21  | 5078(3)    | 3457(4)    | 9580.3(14) | 46.7(13) |
| F22  | 3908(3)    | 1734(3)    | 9126.4(15) | 44(1)    |
| F23  | 4811(3)    | 1788(4)    | 9524.3(13) | 39.9(13) |
| F24  | 4833(3)    | 1273(3)    | 8951.4(14) | 45.5(11) |
| F25  | 5591(2)    | 2419(3)    | 8603.1(15) | 40.6(10) |
| F26  | 5672(3)    | 3620(4)    | 8908.0(15) | 52.5(13) |
| F27  | 5896(3)    | 2426(4)    | 9210.3(14) | 43.8(14) |
| O3B  | 4316(8)    | 2896(9)    | 8684(3)    | 22.8(7)  |
| C9B  | 4820(6)    | 2773(7)    | 8974(3)    | 26.2(10) |
| C10B | 4514(6)    | 2143(7)    | 9245(3)    | 37.5(15) |
| C11B | 5484(5)    | 2387(7)    | 8848(3)    | 31.0(14) |
| C12B | 4992(5)    | 3612(6)    | 9184(3)    | 34.9(14) |
| F19B | 4073(4)    | 2516(5)    | 9443(2)    | 40.3(11) |
| F20B | 5011(6)    | 1748(9)    | 9470(3)    | 50.2(12) |
| F21B | 4195(6)    | 1512(6)    | 9040(2)    | 46.7(13) |
| F22B | 5410(4)    | 1579(5)    | 8759(2)    | 44(1)    |

|      |           |           |            |          |
|------|-----------|-----------|------------|----------|
| F23B | 6013(5)   | 2459(8)   | 9103(3)    | 39.9(13) |
| F24B | 5662(5)   | 2819(6)   | 8551(3)    | 45.5(11) |
| F25B | 5402(4)   | 4092(5)   | 9006(2)    | 40.6(10) |
| F26B | 5307(5)   | 3533(9)   | 9534(3)    | 52.5(13) |
| F27B | 4417(5)   | 4056(8)   | 9219(3)    | 43.8(14) |
| O4   | 4215(3)   | 1692(3)   | 8106.9(17) | 21.7(6)  |
| C13  | 4294(3)   | 1106(4)   | 7836.6(18) | 25.0(9)  |
| C14  | 4388(3)   | 233(4)    | 8033.2(18) | 32.4(14) |
| C15  | 3675(3)   | 1066(4)   | 7528.5(18) | 33.6(14) |
| C16  | 4942(3)   | 1305(4)   | 7638.0(18) | 31.9(13) |
| F28  | 4981(3)   | 151(3)    | 8220.4(14) | 55.2(11) |
| F29  | 3911(3)   | 138(3)    | 8275.0(14) | 53.6(13) |
| F30  | 4274(3)   | -400(3)   | 7772.7(16) | 32(1)    |
| F31  | 3505(3)   | 1869(3)   | 7423.4(14) | 45.9(12) |
| F32  | 3150(2)   | 691(3)    | 7658.9(14) | 51.2(12) |
| F33  | 3793(2)   | 647(3)    | 7221.4(14) | 36.1(12) |
| F34  | 5435(2)   | 1591(3)   | 7899.7(14) | 44.9(11) |
| F35  | 4828(2)   | 1872(3)   | 7374.3(12) | 42.5(10) |
| F36  | 5176(4)   | 634(5)    | 7468(2)    | 44.8(11) |
| O4B  | 4181(8)   | 1686(7)   | 8105(3)    | 21.7(6)  |
| C13B | 4341(6)   | 1111(8)   | 7848(3)    | 25.0(9)  |
| C14B | 4072(6)   | 245(7)    | 7973(3)    | 32.4(14) |
| C15B | 3982(6)   | 1362(8)   | 7453(3)    | 33.6(14) |
| C16B | 5117(6)   | 1035(7)   | 7818(3)    | 31.9(13) |
| F28B | 3384(5)   | 264(7)    | 7897(3)    | 55.2(11) |
| F29B | 4389(9)   | -408(10)  | 7823(5)    | 53.6(13) |
| F30B | 4270(5)   | 127(6)    | 8344(2)    | 32(1)    |
| F31B | 4384(6)   | 1932(6)   | 7290(3)    | 45.9(12) |
| F32B | 3949(8)   | 715(10)   | 7214(5)    | 51.2(12) |
| F33B | 3360(5)   | 1642(7)   | 7493(3)    | 36.1(12) |
| F34B | 5383(5)   | 552(6)    | 8110(3)    | 44.9(11) |
| F35B | 5391(7)   | 1792(6)   | 7787(3)    | 42.5(10) |
| F36B | 5260(10)  | 591(12)   | 7518(5)    | 44.8(11) |
| A11A | 7555.6(6) | 8060.8(9) | 9351.9(4)  | 25.5(3)  |
| O1A  | 8284(4)   | 8298(6)   | 9141(2)    | 32.9(8)  |
| C1A  | 8659(4)   | 8218(5)   | 8849(2)    | 28.2(11) |
| C2A  | 8254(4)   | 8533(5)   | 8478(2)    | 38.0(16) |
| C3A  | 9309(4)   | 8773(5)   | 8927(2)    | 38.9(17) |
| C4A  | 8861(5)   | 7288(5)   | 8798(2)    | 36.4(13) |
| F1A  | 7606(3)   | 8273(4)   | 8455.3(18) | 50.2(13) |
| F2A  | 8240(4)   | 9382(4)   | 8472.6(17) | 55.8(14) |
| F3A  | 8508(3)   | 8289(4)   | 8162.5(15) | 45.4(13) |



|      |         |          |            |          |
|------|---------|----------|------------|----------|
| F4A  | 9155(3) | 9512(4)  | 9079.5(18) | 51.4(13) |
| F5A  | 9625(3) | 8918(4)  | 8619.1(17) | 52.0(14) |
| F6A  | 9747(3) | 8388(4)  | 9171.4(18) | 55.9(14) |
| F7A  | 9362(3) | 7189(4)  | 8582.9(19) | 48.9(16) |
| F8A  | 8330(3) | 6835(4)  | 8651.8(18) | 37.6(13) |
| F9A  | 9039(4) | 6924(5)  | 9129(2)    | 57.9(17) |
| O1C  | 8249(5) | 8282(10) | 9116(3)    | 32.9(8)  |
| C1C  | 8562(5) | 8246(7)  | 8799(3)    | 28.2(11) |
| C2C  | 8035(6) | 8428(7)  | 8453(3)    | 38.0(16) |
| C3C  | 9110(6) | 8947(7)  | 8830(3)    | 38.9(17) |
| C4C  | 8885(6) | 7374(7)  | 8746(3)    | 36.4(13) |
| F1C  | 7875(5) | 9239(5)  | 8429(2)    | 50.2(13) |
| F2C  | 8247(6) | 8216(7)  | 8125(3)    | 55.8(14) |
| F3C  | 7479(5) | 7973(6)  | 8476(3)    | 45.4(13) |
| F4C  | 9660(5) | 8726(6)  | 9068(3)    | 51.4(13) |
| F5C  | 9340(5) | 9114(6)  | 8500(3)    | 52.0(14) |
| F6C  | 8877(5) | 9651(6)  | 8958(3)    | 55.9(14) |
| F7C  | 8439(6) | 6811(8)  | 8587(3)    | 48.9(16) |
| F8C  | 9343(5) | 7393(6)  | 8496(3)    | 37.6(13) |
| F9C  | 9196(7) | 7107(8)  | 9079(3)    | 57.9(17) |
| O2A  | 7319(5) | 7044(5)  | 9229(3)    | 43.8(12) |
| C5A  | 6778(4) | 6507(5)  | 9169(2)    | 42.0(19) |
| C6A  | 6238(4) | 6834(6)  | 8844(3)    | 48(2)    |
| C7A  | 6426(5) | 6389(6)  | 9536(3)    | 53(2)    |
| C8A  | 7074(5) | 5657(5)  | 9052(3)    | 51.6(18) |
| F10A | 6543(4) | 7135(6)  | 8555(2)    | 72.6(17) |
| F11A | 5840(4) | 6176(5)  | 8708(2)    | 76.5(17) |
| F12A | 5829(3) | 7393(4)  | 8967(2)    | 64.3(14) |
| F13A | 5798(3) | 6046(4)  | 9464(2)    | 62.6(14) |
| F14A | 6326(4) | 7147(4)  | 9694(2)    | 55.6(13) |
| F15A | 6812(4) | 5941(5)  | 9784(2)    | 80(2)    |
| F16A | 7226(5) | 5715(8)  | 8692(2)    | 68(2)    |
| F17A | 6638(4) | 5027(4)  | 9088(3)    | 80.2(19) |
| F18A | 7661(4) | 5481(5)  | 9269(3)    | 64(2)    |
| O2C  | 7321(7) | 7040(5)  | 9277(4)    | 43.8(12) |
| C5C  | 6931(5) | 6333(6)  | 9284(3)    | 42.0(19) |
| C6C  | 6376(6) | 6526(8)  | 9553(3)    | 48(2)    |
| C7C  | 7354(5) | 5554(6)  | 9432(3)    | 53(2)    |
| C8C  | 6618(5) | 6164(6)  | 8874(3)    | 51.6(18) |
| F10C | 5902(4) | 7018(6)  | 9373(3)    | 72.6(17) |
| F11C | 6647(5) | 6879(6)  | 9870(3)    | 76.5(17) |
| F12C | 6082(4) | 5808(5)  | 9655(3)    | 64.3(14) |



|      |         |          |             |          |
|------|---------|----------|-------------|----------|
| F13C | 7516(4) | 5617(5)  | 9804(2)     | 62.6(14) |
| F14C | 6997(4) | 4841(4)  | 9358(2)     | 55.6(13) |
| F15C | 7915(6) | 5539(9)  | 9268(4)     | 80(2)    |
| F16C | 6404(5) | 6870(7)  | 8694(3)     | 68(2)    |
| F17C | 6066(5) | 5674(6)  | 8875(3)     | 80.2(19) |
| F18C | 7053(6) | 5781(8)  | 8664(4)     | 64(2)    |
| O3A  | 6880(6) | 8687(8)  | 9181(4)     | 46.5(10) |
| C9A  | 6447(5) | 9310(7)  | 9244(3)     | 36.6(18) |
| C10A | 6830(5) | 10108(6) | 9122(3)     | 52(3)    |
| C11A | 6283(5) | 9405(7)  | 9657(3)     | 54(4)    |
| C12A | 5790(5) | 9181(7)  | 8972(3)     | 45(3)    |
| F19A | 7495(5) | 10043(7) | 9241(3)     | 62.0(15) |
| F20A | 6562(6) | 10798(6) | 9241(3)     | 71.3(18) |
| F21A | 6810(7) | 10195(8) | 8746(3)     | 65.6(16) |
| F22A | 5720(5) | 9904(6)  | 9677(2)     | 54.7(13) |
| F23A | 6779(5) | 9695(6)  | 9900(3)     | 57.7(13) |
| F24A | 6130(5) | 8680(5)  | 9800(2)     | 48.1(12) |
| F25A | 5438(4) | 9893(6)  | 8916(3)     | 60.3(14) |
| F26A | 5377(4) | 8620(7)  | 9111(3)     | 61.2(16) |
| F27A | 5925(5) | 8876(6)  | 8644(2)     | 52.9(12) |
| O3C  | 6870(4) | 8712(5)  | 9206(3)     | 46.5(10) |
| C9C  | 6614(4) | 9513(5)  | 9211(2)     | 36.6(18) |
| C10C | 6460(5) | 9918(6)  | 8810(2)     | 55(3)    |
| C11C | 7078(4) | 10163(5) | 9453(2)     | 46(2)    |
| C12C | 5928(4) | 9454(5)  | 9385(2)     | 52(2)    |
| F19C | 6203(3) | 9336(4)  | 8565.3(16)  | 62.0(15) |
| F20C | 7055(3) | 10145(5) | 8689(2)     | 71.3(18) |
| F21C | 6044(3) | 10574(4) | 8789.9(17)  | 65.6(16) |
| F22C | 7014(4) | 10010(4) | 9817.6(14)  | 54.7(13) |
| F23C | 6920(3) | 10961(3) | 9386.5(18)  | 57.7(13) |
| F24C | 7698(3) | 10047(4) | 9399.5(16)  | 48.1(12) |
| F25C | 5985(3) | 8961(5)  | 9685.5(19)  | 60.3(14) |
| F26C | 5447(3) | 9152(5)  | 9127.3(19)  | 61.2(16) |
| F27C | 5706(3) | 10191(4) | 9504.4(17)  | 52.9(12) |
| O4A  | 7721(4) | 8258(6)  | 9825.2(17)  | 38.4(9)  |
| C13A | 8157(4) | 8119(5)  | 10138(2)    | 38.7(15) |
| C14A | 8875(4) | 8406(6)  | 10077(2)    | 52.2(19) |
| C15A | 7903(5) | 8677(6)  | 10462(3)    | 45.9(13) |
| C16A | 8161(4) | 7181(5)  | 10255(2)    | 50.8(19) |
| F28A | 9178(3) | 7809(4)  | 9876.3(17)  | 65.6(14) |
| F29A | 9275(3) | 8493(5)  | 10402.4(17) | 72.6(15) |
| F30A | 8886(3) | 9131(4)  | 9886.1(18)  | 64.1(14) |

|      |            |          |             |          |
|------|------------|----------|-------------|----------|
| F31A | 8192(3)    | 8414(4)  | 10800.7(16) | 51.1(14) |
| F32A | 8073(4)    | 9498(5)  | 10416(2)    | 64.1(19) |
| F33A | 7239(3)    | 8648(4)  | 10460.4(19) | 51.5(14) |
| F34A | 8205(3)    | 6696(4)  | 9953.0(17)  | 65.9(14) |
| F35A | 8641(4)    | 6991(5)  | 10520.5(19) | 81.7(17) |
| F36A | 7564(3)    | 7000(4)  | 10393.5(16) | 61.1(14) |
| O4C  | 7778(7)    | 8311(11) | 9826(2)     | 38.4(9)  |
| C13C | 8257(5)    | 8352(7)  | 10127(3)    | 38.7(15) |
| C14C | 8846(6)    | 8929(8)  | 10051(3)    | 52.2(19) |
| C15C | 7942(7)    | 8708(9)  | 10479(4)    | 45.9(13) |
| C16C | 8534(6)    | 7461(7)  | 10222(3)    | 50.8(19) |
| F28C | 9211(5)    | 9163(8)  | 10362(3)    | 65.6(14) |
| F29C | 8595(6)    | 9619(7)  | 9857(3)     | 72.6(15) |
| F30C | 9259(5)    | 8567(7)  | 9823(3)     | 64.1(14) |
| F31C | 7855(6)    | 9541(7)  | 10435(3)    | 51.1(14) |
| F32C | 8357(7)    | 8642(8)  | 10798(3)    | 64.1(19) |
| F33C | 7358(5)    | 8346(7)  | 10503(3)    | 51.5(14) |
| F34C | 8664(6)    | 7072(6)  | 9904(3)     | 65.9(14) |
| F35C | 9151(6)    | 7495(8)  | 10426(3)    | 81.7(17) |
| F36C | 8066(6)    | 7027(6)  | 10408(3)    | 61.1(14) |
| C101 | 5886(3)    | 6589(3)  | 5890.9(13)  | 40.0(12) |
| C102 | 6622(3)    | 6735(4)  | 5917.5(14)  | 42.0(12) |
| O103 | 6807.7(17) | 7469(2)  | 6126.5(10)  | 40.5(8)  |
| C104 | 7494(3)    | 7688(4)  | 6144.8(16)  | 46.3(13) |
| C105 | 7635(3)    | 8471(4)  | 6347.4(17)  | 53.0(15) |
| O106 | 7440.0(17) | 8421(2)  | 6722.4(10)  | 38.5(8)  |
| C107 | 7632(3)    | 9117(4)  | 6955.1(17)  | 51.8(15) |
| C108 | 7460(3)    | 8972(4)  | 7336.4(16)  | 49.5(14) |
| O109 | 6758.9(17) | 8815(2)  | 7344.1(10)  | 38.5(8)  |
| C110 | 6547(3)    | 8719(4)  | 7703.4(14)  | 47.1(14) |
| C111 | 5816(3)    | 8569(4)  | 7686.0(16)  | 45.5(13) |
| O112 | 5611.4(17) | 7872(2)  | 7459.6(9)   | 32.5(7)  |
| C113 | 4925(3)    | 7660(4)  | 7448.3(15)  | 41.7(12) |
| C114 | 4763(3)    | 6886(3)  | 7229.7(13)  | 39.9(12) |
| O115 | 4930.2(17) | 6946(2)  | 6860.1(9)   | 36.8(8)  |
| C116 | 4771(2)    | 6234(3)  | 6635.5(13)  | 32.6(10) |
| C117 | 4963(3)    | 6351(4)  | 6247.7(15)  | 41.5(12) |
| O118 | 5661.0(16) | 6516(2)  | 6253.4(8)   | 31.1(7)  |
| C201 | 3393(3)    | 5563(4)  | 9603.6(19)  | 42.7(16) |
| C202 | 4020(3)    | 6077(4)  | 9563.8(17)  | 40.5(14) |
| O203 | 3858(2)    | 6938(3)  | 9608.0(12)  | 36.9(9)  |
| C204 | 4428(3)    | 7478(4)  | 9600(2)     | 41.7(16) |

|      |          |          |            |          |
|------|----------|----------|------------|----------|
| C205 | 4217(3)  | 8366(4)  | 9650.3(18) | 43.1(15) |
| O206 | 3772(2)  | 8598(3)  | 9325.6(12) | 37.9(10) |
| C207 | 3618(4)  | 9475(4)  | 9313(2)    | 44.5(19) |
| C208 | 3170(3)  | 9665(4)  | 8966.2(19) | 45.3(15) |
| O209 | 2542(2)  | 9228(3)  | 8980.4(12) | 38.3(10) |
| C210 | 2056(4)  | 9410(5)  | 8668.5(18) | 45.8(16) |
| C211 | 1420(3)  | 8938(4)  | 8702.5(19) | 44.5(15) |
| O212 | 1570(2)  | 8070(3)  | 8680.5(12) | 40(1)    |
| C213 | 981(3)   | 7568(5)  | 8714(2)    | 48.0(16) |
| C214 | 1156(3)  | 6658(5)  | 8677(2)    | 46.5(16) |
| O215 | 1634(2)  | 6430(3)  | 8982.7(12) | 39.6(10) |
| C216 | 1787(4)  | 5548(4)  | 8986.6(19) | 43.9(15) |
| C217 | 2267(3)  | 5347(4)  | 9329.9(18) | 41.1(14) |
| O218 | 2887(2)  | 5778(3)  | 9301.2(11) | 35.7(9)  |
| C401 | 4197(10) | 6597(12) | 9557(8)    | 42.7(16) |
| C402 | 4288(15) | 7461(12) | 9713(7)    | 40.5(14) |
| O403 | 3956(9)  | 8018(10) | 9437(5)    | 36.9(9)  |
| C404 | 3992(13) | 8864(12) | 9567(7)    | 41.7(16) |
| C405 | 3731(11) | 9430(20) | 9262(10)   | 43.1(15) |
| O406 | 3024(8)  | 9252(11) | 9170(5)    | 37.9(10) |
| C407 | 2726(10) | 9762(15) | 8872(7)    | 44.5(19) |
| C408 | 1988(10) | 9621(12) | 8815(9)    | 45.3(15) |
| O409 | 1888(9)  | 8758(10) | 8691(5)    | 38.3(10) |
| C410 | 1201(11) | 8517(12) | 8635(8)    | 45.8(16) |
| C411 | 1107(14) | 7636(12) | 8525(7)    | 44.5(15) |
| O412 | 1410(9)  | 7122(10) | 8820(5)    | 40(1)    |
| C413 | 1272(14) | 6258(12) | 8765(7)    | 48.0(16) |
| C414 | 1578(9)  | 5750(18) | 9087(8)    | 46.5(16) |
| O415 | 2293(7)  | 5834(11) | 9113(5)    | 39.6(10) |
| C416 | 2634(10) | 5350(16) | 9405(7)    | 43.9(15) |
| C417 | 3380(11) | 5507(12) | 9440(9)    | 41.1(14) |
| O418 | 3502(8)  | 6364(10) | 9539(5)    | 35.7(9)  |
| F501 | 6436(2)  | 1540(4)  | 7253.9(14) | 55.4(12) |
| C501 | 7047(2)  | 1385(4)  | 7426.3(14) | 33.1(15) |
| C502 | 7109(2)  | 1239(4)  | 7814.1(14) | 34.0(16) |
| C503 | 7745(3)  | 1082(5)  | 8006.9(12) | 37.5(16) |
| C504 | 8319(2)  | 1070(5)  | 7811.9(17) | 35.8(16) |
| C505 | 8256(2)  | 1216(5)  | 7424.1(17) | 33.8(15) |
| C506 | 7621(2)  | 1373(4)  | 7231.3(12) | 32.7(15) |
| F511 | 8671(5)  | 1083(8)  | 7192(3)    | 55.4(12) |
| C511 | 8152(6)  | 1232(12) | 7370(4)    | 33.1(15) |
| C512 | 7493(7)  | 1474(11) | 7238(3)    | 34.0(16) |

|      |          |          |             |          |
|------|----------|----------|-------------|----------|
| C513 | 7007(5)  | 1569(11) | 7491(4)     | 37.5(16) |
| C514 | 7179(7)  | 1423(11) | 7875(4)     | 35.8(16) |
| C515 | 7837(7)  | 1181(13) | 8006(3)     | 33.8(15) |
| C516 | 8324(6)  | 1086(13) | 7754(4)     | 32.7(15) |
| F601 | 4995(4)  | 8385(4)  | 5761.1(17)  | 67.8(15) |
| C601 | 5206(3)  | 8878(5)  | 6040.6(17)  | 30.4(17) |
| C602 | 4778(4)  | 8939(6)  | 6326(2)     | 31.4(17) |
| C603 | 4952(5)  | 9458(7)  | 6636(2)     | 34.3(17) |
| C604 | 5555(5)  | 9915(6)  | 6661.8(19)  | 35.5(17) |
| C605 | 5983(4)  | 9855(6)  | 6377(2)     | 30.8(16) |
| C606 | 5809(3)  | 9336(5)  | 6066.1(17)  | 29.1(16) |
| F611 | 5980(5)  | 9181(6)  | 5746(2)     | 67.8(15) |
| C611 | 5617(5)  | 9264(8)  | 6030(3)     | 30.4(17) |
| C612 | 5029(5)  | 8829(7)  | 6092(3)     | 31.4(17) |
| C613 | 4724(6)  | 8968(9)  | 6422(3)     | 34.3(17) |
| C614 | 5008(7)  | 9542(10) | 6689(3)     | 35.5(17) |
| C615 | 5596(7)  | 9977(9)  | 6626(3)     | 30.8(16) |
| C616 | 5901(6)  | 9838(9)  | 6297(3)     | 29.1(16) |
| F701 | 4536(2)  | 8152(3)  | 8474.2(13)  | 63.2(13) |
| C701 | 3998(2)  | 7685(3)  | 8395.6(14)  | 34.2(15) |
| C702 | 3389(2)  | 7952(3)  | 8200.5(17)  | 30.5(14) |
| C703 | 2861(2)  | 7381(3)  | 8118(2)     | 32.0(14) |
| C704 | 2940(2)  | 6544(3)  | 8230(2)     | 34.9(15) |
| C705 | 3548(3)  | 6277(3)  | 8426(2)     | 35.9(14) |
| C706 | 4077(2)  | 6847(3)  | 8508.2(16)  | 36.0(15) |
| F711 | 4645(7)  | 6553(12) | 8698(4)     | 63.2(13) |
| C711 | 4014(8)  | 6636(14) | 8528(6)     | 34.2(15) |
| C712 | 4080(9)  | 7490(14) | 8449(6)     | 30.5(14) |
| C713 | 3542(13) | 7926(12) | 8255(8)     | 32.0(14) |
| C714 | 2938(11) | 7508(16) | 8139(9)     | 34.9(15) |
| C715 | 2871(9)  | 6654(16) | 8218(10)    | 35.9(14) |
| C716 | 3409(11) | 6219(12) | 8413(9)     | 36.0(15) |
| F801 | 7914(4)  | 3812(4)  | 9726(2)     | 107(2)   |
| C801 | 8130(3)  | 3104(3)  | 9894.7(15)  | 45.7(16) |
| C802 | 7646(2)  | 2538(4)  | 9998.4(17)  | 49.3(16) |
| C803 | 7848(3)  | 1773(3)  | 10165.6(17) | 46.5(16) |
| C804 | 8535(3)  | 1574(3)  | 10229.0(17) | 54.6(18) |
| C805 | 9020(2)  | 2140(4)  | 10125.4(18) | 55.3(18) |
| C806 | 8817(2)  | 2905(3)  | 9958.2(17)  | 50.5(17) |
| F811 | 9167(9)  | 1139(10) | 10360(5)    | 107(2)   |
| C811 | 8763(6)  | 1752(7)  | 10219(4)    | 45.7(16) |
| C812 | 8988(6)  | 2522(8)  | 10092(5)    | 49.3(16) |

|      |         |          |             |          |
|------|---------|----------|-------------|----------|
| C813 | 8521(8) | 3123(7)  | 9945(4)     | 46.5(16) |
| C814 | 7828(7) | 2954(9)  | 9925(4)     | 54.6(18) |
| C815 | 7603(5) | 2183(10) | 10051(5)    | 55.3(18) |
| C816 | 8070(7) | 1582(8)  | 10198(5)    | 50.5(17) |
| C901 | 9814(4) | 4660(4)  | 10298.0(18) | 62.2(17) |
| F901 | 9634(5) | 4286(6)  | 10616(2)    | 87(3)    |
| C902 | 9358(3) | 5210(4)  | 10122(2)    | 61.6(17) |
| C903 | 9573(4) | 5514(4)  | 9836(2)     | 66.1(18) |

### 2.1.3. Anisotropic Displacement Parameters

| Atom | U <sub>11</sub> | U <sub>22</sub> | U <sub>33</sub> | U <sub>23</sub> | U <sub>13</sub> | U <sub>12</sub> |
|------|-----------------|-----------------|-----------------|-----------------|-----------------|-----------------|
| Ga1  | 23.3(2)         | 26.9(2)         | 28.2(2)         | 0.72(19)        | 1.93(19)        | -0.14(18)       |
| Ga2  | 30.1(3)         | 36.2(3)         | 27.0(3)         | -2.4(2)         | 5.3(2)          | 0.5(2)          |
| Al1  | 17.4(6)         | 19.5(5)         | 17.3(5)         | -1.1(4)         | 4.5(4)          | 0.6(4)          |
| O1   | 19.3(14)        | 29.0(15)        | 23.9(14)        | -1.3(12)        | 3.4(11)         | 4.2(11)         |
| C1   | 20(2)           | 36(2)           | 26(2)           | -3.7(17)        | 3.0(17)         | 4.4(17)         |
| C2   | 25(2)           | 44(3)           | 38(3)           | -4(2)           | -3(2)           | 8(2)            |
| C3   | 29(2)           | 43(3)           | 46(3)           | 3(2)            | 12(2)           | -1(2)           |
| C4   | 25(2)           | 54(3)           | 37(3)           | -11(2)          | 8(2)            | 3(2)            |
| F1   | 39.1(16)        | 52.6(18)        | 32.9(15)        | 3.0(13)         | -6.5(12)        | 10.6(13)        |
| F2   | 20.8(14)        | 60(2)           | 62(2)           | -4.6(16)        | -2.1(13)        | 10.5(13)        |
| F3   | 40.2(16)        | 30.9(15)        | 64(2)           | -4.9(14)        | 0.5(14)         | 12.0(12)        |
| F4   | 33.4(16)        | 61(2)           | 63(2)           | 3.3(16)         | 21.8(15)        | -6.8(14)        |
| F5   | 40.8(17)        | 37.2(16)        | 64(2)           | 13.0(14)        | 15.6(15)        | 2.2(13)         |
| F6   | 39.0(16)        | 44.6(17)        | 50.8(18)        | -17.2(14)       | 6.0(14)         | -8.6(13)        |
| F7   | 32.6(16)        | 85(2)           | 44.0(17)        | -21.9(16)       | 12.3(13)        | 12.3(16)        |
| F8   | 40.8(17)        | 79(2)           | 28.0(15)        | 8.2(15)         | 11.4(13)        | 7.8(16)         |
| F9   | 33.7(15)        | 55.6(18)        | 42.6(16)        | -23.4(14)       | 0.3(13)         | 7.1(13)         |
| O2   | 30.7(16)        | 23.1(14)        | 27.1(15)        | 0.9(12)         | 12.8(13)        | -3.2(12)        |
| C5   | 36(2)           | 27(2)           | 25(2)           | 0.9(17)         | 11.2(18)        | -5.6(18)        |
| C6   | 48(3)           | 32(2)           | 31(2)           | 7.5(19)         | 7(2)            | -8(2)           |
| C7   | 49(3)           | 36(3)           | 34(3)           | -2(2)           | 22(2)           | -10(2)          |
| C8   | 42(3)           | 26(2)           | 31(2)           | 0.5(18)         | 8(2)            | -4.0(19)        |
| F10  | 45.6(17)        | 35.0(15)        | 48.5(17)        | 7.4(13)         | 7.1(14)         | 8.0(13)         |
| F11  | 67(2)           | 40.5(16)        | 36.9(16)        | 15.6(13)        | 2.4(15)         | -10.7(15)       |
| F12  | 50.8(18)        | 40.6(16)        | 34.7(15)        | 5.0(12)         | -3.1(13)        | -11.8(13)       |
| F13  | 68(2)           | 47.4(17)        | 30.8(15)        | -7.7(13)        | 23.7(14)        | -15.8(15)       |
| F14  | 64(2)           | 43.4(17)        | 48.0(18)        | 0.5(14)         | 31.0(15)        | -22.2(15)       |
| F15  | 37.2(16)        | 48.3(17)        | 54.1(18)        | -2.7(14)        | 23.7(14)        | -4.0(13)        |
| F16  | 74(2)           | 25.8(14)        | 37.4(16)        | 1.1(12)         | 13.4(15)        | -10.5(14)       |
| F17  | 40.5(17)        | 47.0(17)        | 40.9(16)        | -6.3(13)        | 3.5(13)         | -10.7(13)       |
| F18  | 52.1(17)        | 30.2(14)        | 27.8(13)        | -0.9(11)        | 14.0(12)        | 3.1(12)         |

|      |          |          |          |           |          |           |
|------|----------|----------|----------|-----------|----------|-----------|
| O3   | 24.8(16) | 25.2(16) | 18.3(14) | -1.1(12)  | 1.5(12)  | 1.7(13)   |
| C9   | 25(3)    | 33(2)    | 20(2)    | -1.3(17)  | 0.9(19)  | 2.4(19)   |
| C10  | 43(4)    | 42(4)    | 27(3)    | 0(3)      | -1(3)    | 2(3)      |
| C11  | 30(3)    | 39(3)    | 23(3)    | -1(3)     | -5(3)    | 7(3)      |
| C12  | 28(3)    | 45(4)    | 30(3)    | -6(3)     | -4(3)    | -2(3)     |
| F19  | 56(3)    | 36(2)    | 29(2)    | -5.9(17)  | 8.7(19)  | -1.0(19)  |
| F20  | 51(3)    | 69(3)    | 33(2)    | -3(2)     | 15(2)    | 7(2)      |
| F21  | 68(4)    | 42(2)    | 26(2)    | -3.1(17)  | -17(2)   | -12(2)    |
| F22  | 44(2)    | 36(2)    | 52(3)    | 2.3(19)   | 4(2)     | 4.2(18)   |
| F23  | 48(3)    | 52(3)    | 20(2)    | 11.6(19)  | 1.9(19)  | 11(2)     |
| F24  | 50(3)    | 38(2)    | 47(2)    | 0.2(19)   | -1(2)    | 12.3(19)  |
| F25  | 31(2)    | 46(2)    | 45(2)    | -7(2)     | 4.1(18)  | 6.9(19)   |
| F26  | 36(2)    | 71(3)    | 49(3)    | 8(2)      | -3(2)    | -27(2)    |
| F27  | 33(2)    | 69(3)    | 27(3)    | -1(2)     | -2.7(19) | 10(2)     |
| O3B  | 24.8(16) | 25.2(16) | 18.3(14) | -1.1(12)  | 1.5(12)  | 1.7(13)   |
| C9B  | 25(3)    | 33(2)    | 20(2)    | -1.3(17)  | 0.9(19)  | 2.4(19)   |
| C10B | 43(4)    | 42(4)    | 27(3)    | 0(3)      | -1(3)    | 2(3)      |
| C11B | 30(3)    | 39(3)    | 23(3)    | -1(3)     | -5(3)    | 7(3)      |
| C12B | 28(3)    | 45(4)    | 30(3)    | -6(3)     | -4(3)    | -2(3)     |
| F19B | 56(3)    | 36(2)    | 29(2)    | -5.9(17)  | 8.7(19)  | -1.0(19)  |
| F20B | 51(3)    | 69(3)    | 33(2)    | -3(2)     | 15(2)    | 7(2)      |
| F21B | 68(4)    | 42(2)    | 26(2)    | -3.1(17)  | -17(2)   | -12(2)    |
| F22B | 44(2)    | 36(2)    | 52(3)    | 2.3(19)   | 4(2)     | 4.2(18)   |
| F23B | 48(3)    | 52(3)    | 20(2)    | 11.6(19)  | 1.9(19)  | 11(2)     |
| F24B | 50(3)    | 38(2)    | 47(2)    | 0.2(19)   | -1(2)    | 12.3(19)  |
| F25B | 31(2)    | 46(2)    | 45(2)    | -7(2)     | 4.1(18)  | 6.9(19)   |
| F26B | 36(2)    | 71(3)    | 49(3)    | 8(2)      | -3(2)    | -27(2)    |
| F27B | 33(2)    | 69(3)    | 27(3)    | -1(2)     | -2.7(19) | 10(2)     |
| O4   | 23.7(14) | 20.7(12) | 21.2(12) | -1.9(10)  | 5.1(11)  | 1(1)      |
| C13  | 26.4(19) | 23.0(17) | 26.0(18) | -4.2(15)  | 4.9(16)  | 3.1(15)   |
| C14  | 39(3)    | 28(2)    | 30(2)    | -4.3(18)  | 5(2)     | 3(2)      |
| C15  | 32(3)    | 35(3)    | 33(2)    | -10(2)    | 1(2)     | 2(2)      |
| C16  | 31(2)    | 31(3)    | 35(3)    | -8(2)     | 10(2)    | -1(2)     |
| F28  | 67(2)    | 43(2)    | 53(2)    | -5.5(17)  | -8.3(19) | 14.2(19)  |
| F29  | 80(3)    | 37(2)    | 48(2)    | 2.2(17)   | 25(2)    | -4(2)     |
| F30  | 40(2)    | 21.7(16) | 35(2)    | -6.5(14)  | 6.1(16)  | 1.1(15)   |
| F31  | 53(2)    | 41(2)    | 40(2)    | -0.2(17)  | -7.8(18) | 12.1(18)  |
| F32  | 37(2)    | 58(2)    | 59(2)    | -26.6(19) | 5.9(18)  | -10.0(17) |
| F33  | 39(2)    | 42(2)    | 25.0(17) | -11.4(15) | -6.0(17) | 4.2(18)   |
| F34  | 28.0(18) | 54(2)    | 53(2)    | -15.9(18) | 6.0(18)  | 2.4(17)   |
| F35  | 55(2)    | 35.8(18) | 40.9(19) | -2.3(15)  | 25.5(17) | -5.5(17)  |
| F36  | 44(2)    | 41.4(16) | 52(2)    | -14.7(16) | 20.9(17) | 4.8(15)   |

|      |          |          |          |           |          |           |
|------|----------|----------|----------|-----------|----------|-----------|
| O4B  | 23.7(14) | 20.7(12) | 21.2(12) | -1.9(10)  | 5.1(11)  | 1(1)      |
| C13B | 26.4(19) | 23.0(17) | 26.0(18) | -4.2(15)  | 4.9(16)  | 3.1(15)   |
| C14B | 39(3)    | 28(2)    | 30(2)    | -4.3(18)  | 5(2)     | 3(2)      |
| C15B | 32(3)    | 35(3)    | 33(2)    | -10(2)    | 1(2)     | 2(2)      |
| C16B | 31(2)    | 31(3)    | 35(3)    | -8(2)     | 10(2)    | -1(2)     |
| F28B | 67(2)    | 43(2)    | 53(2)    | -5.5(17)  | -8.3(19) | 14.2(19)  |
| F29B | 80(3)    | 37(2)    | 48(2)    | 2.2(17)   | 25(2)    | -4(2)     |
| F30B | 40(2)    | 21.7(16) | 35(2)    | -6.5(14)  | 6.1(16)  | 1.1(15)   |
| F31B | 53(2)    | 41(2)    | 40(2)    | -0.2(17)  | -7.8(18) | 12.1(18)  |
| F32B | 37(2)    | 58(2)    | 59(2)    | -26.6(19) | 5.9(18)  | -10.0(17) |
| F33B | 39(2)    | 42(2)    | 25.0(17) | -11.4(15) | -6.0(17) | 4.2(18)   |
| F34B | 28.0(18) | 54(2)    | 53(2)    | -15.9(18) | 6.0(18)  | 2.4(17)   |
| F35B | 55(2)    | 35.8(18) | 40.9(19) | -2.3(15)  | 25.5(17) | -5.5(17)  |
| F36B | 44(2)    | 41.4(16) | 52(2)    | -14.7(16) | 20.9(17) | 4.8(15)   |
| Al1A | 19.8(6)  | 35.9(7)  | 21.3(6)  | -2.8(5)   | 5.4(5)   | -2.6(5)   |
| O1A  | 29.0(16) | 46.8(18) | 24.6(16) | 0.9(14)   | 10.9(13) | -2.6(14)  |
| C1A  | 27(2)    | 33(2)    | 26(2)    | -1.8(17)  | 7.7(18)  | -0.1(17)  |
| C2A  | 41(3)    | 42(3)    | 32(2)    | 3(2)      | 7(2)     | 1(3)      |
| C3A  | 41(3)    | 41(3)    | 36(3)    | -4(2)     | 10(2)    | -3(3)     |
| C4A  | 33(2)    | 37(2)    | 39(3)    | -4(2)     | 5(2)     | 1.7(19)   |
| F1A  | 51(3)    | 54(2)    | 43(2)    | 2(2)      | -8(2)    | 13(2)     |
| F2A  | 62(3)    | 58(2)    | 50(2)    | 8(2)      | 13(2)    | 5(2)      |
| F3A  | 50(2)    | 61(3)    | 26.0(19) | 0.1(18)   | 9.2(18)  | 8(2)      |
| F4A  | 48(2)    | 47(2)    | 61(3)    | -17(2)    | 15(2)    | -14.5(19) |
| F5A  | 48(3)    | 59(2)    | 53(3)    | 0(2)      | 25(2)    | -12(2)    |
| F6A  | 46(2)    | 63(3)    | 59(3)    | -11(2)    | 6(2)     | -6(2)     |
| F7A  | 47(2)    | 46(3)    | 56(3)    | 0(2)      | 14(2)    | 2(2)      |
| F8A  | 34(2)    | 36(2)    | 45(2)    | -16.7(18) | 18.8(18) | -2.7(17)  |
| F9A  | 61(3)    | 56(3)    | 55(2)    | 11(2)     | -1(2)    | 16(2)     |
| O1C  | 29.0(16) | 46.8(18) | 24.6(16) | 0.9(14)   | 10.9(13) | -2.6(14)  |
| C1C  | 27(2)    | 33(2)    | 26(2)    | -1.8(17)  | 7.7(18)  | -0.1(17)  |
| C2C  | 41(3)    | 42(3)    | 32(2)    | 3(2)      | 7(2)     | 1(3)      |
| C3C  | 41(3)    | 41(3)    | 36(3)    | -4(2)     | 10(2)    | -3(3)     |
| C4C  | 33(2)    | 37(2)    | 39(3)    | -4(2)     | 5(2)     | 1.7(19)   |
| F1C  | 51(3)    | 54(2)    | 43(2)    | 2(2)      | -8(2)    | 13(2)     |
| F2C  | 62(3)    | 58(2)    | 50(2)    | 8(2)      | 13(2)    | 5(2)      |
| F3C  | 50(2)    | 61(3)    | 26.0(19) | 0.1(18)   | 9.2(18)  | 8(2)      |
| F4C  | 48(2)    | 47(2)    | 61(3)    | -17(2)    | 15(2)    | -14.5(19) |
| F5C  | 48(3)    | 59(2)    | 53(3)    | 0(2)      | 25(2)    | -12(2)    |
| F6C  | 46(2)    | 63(3)    | 59(3)    | -11(2)    | 6(2)     | -6(2)     |
| F7C  | 47(2)    | 46(3)    | 56(3)    | 0(2)      | 14(2)    | 2(2)      |
| F8C  | 34(2)    | 36(2)    | 45(2)    | -16.7(18) | 18.8(18) | -2.7(17)  |



|      |       |          |        |           |         |           |
|------|-------|----------|--------|-----------|---------|-----------|
| F9C  | 61(3) | 56(3)    | 55(2)  | 11(2)     | -1(2)   | 16(2)     |
| O2A  | 51(2) | 34.2(19) | 50(3)  | -12.8(17) | 23(2)   | -10.9(16) |
| C5A  | 39(4) | 42(4)    | 49(5)  | -5(3)     | 21(3)   | -11(3)    |
| C6A  | 30(4) | 48(5)    | 67(5)  | -12(4)    | 5(4)    | 1(3)      |
| C7A  | 54(5) | 52(5)    | 58(4)  | 15(4)     | 32(4)   | -5(4)     |
| C8A  | 54(5) | 39(4)    | 63(4)  | 1(3)      | 9(4)    | -11(3)    |
| F10A | 50(3) | 88(4)    | 81(4)  | -14(3)    | 14(3)   | -15(3)    |
| F11A | 69(4) | 71(4)    | 92(4)  | -29(3)    | 19(3)   | -13(3)    |
| F12A | 38(3) | 69(3)    | 87(4)  | -5(3)     | 10(3)   | -6(2)     |
| F13A | 50(3) | 63(3)    | 78(4)  | -1(3)     | 21(3)   | -7(2)     |
| F14A | 65(3) | 45(3)    | 63(3)  | -4(2)     | 33(3)   | -1(2)     |
| F15A | 96(5) | 68(4)    | 82(4)  | 27(3)     | 38(4)   | 1(4)      |
| F16A | 58(4) | 91(5)    | 58(4)  | -24(3)    | 16(3)   | -13(3)    |
| F17A | 64(4) | 47(3)    | 132(6) | -14(3)    | 21(4)   | -25(3)    |
| F18A | 80(5) | 40(3)    | 75(4)  | -1(3)     | 16(4)   | -15(3)    |
| O2C  | 51(2) | 34.2(19) | 50(3)  | -12.8(17) | 23(2)   | -10.9(16) |
| C5C  | 39(4) | 42(4)    | 49(5)  | -5(3)     | 21(3)   | -11(3)    |
| C6C  | 30(4) | 48(5)    | 67(5)  | -12(4)    | 5(4)    | 1(3)      |
| C7C  | 54(5) | 52(5)    | 58(4)  | 15(4)     | 32(4)   | -5(4)     |
| C8C  | 54(5) | 39(4)    | 63(4)  | 1(3)      | 9(4)    | -11(3)    |
| F10C | 50(3) | 88(4)    | 81(4)  | -14(3)    | 14(3)   | -15(3)    |
| F11C | 69(4) | 71(4)    | 92(4)  | -29(3)    | 19(3)   | -13(3)    |
| F12C | 38(3) | 69(3)    | 87(4)  | -5(3)     | 10(3)   | -6(2)     |
| F13C | 50(3) | 63(3)    | 78(4)  | -1(3)     | 21(3)   | -7(2)     |
| F14C | 65(3) | 45(3)    | 63(3)  | -4(2)     | 33(3)   | -1(2)     |
| F15C | 96(5) | 68(4)    | 82(4)  | 27(3)     | 38(4)   | 1(4)      |
| F16C | 58(4) | 91(5)    | 58(4)  | -24(3)    | 16(3)   | -13(3)    |
| F17C | 64(4) | 47(3)    | 132(6) | -14(3)    | 21(4)   | -25(3)    |
| F18C | 80(5) | 40(3)    | 75(4)  | -1(3)     | 16(4)   | -15(3)    |
| O3A  | 46(2) | 53(2)    | 40(2)  | -9.7(18)  | 5.1(17) | 19.8(18)  |
| C9A  | 22(4) | 52(4)    | 36(3)  | -8(3)     | 2(3)    | 11(3)     |
| C10A | 24(6) | 34(6)    | 92(10) | 0(6)      | -18(6)  | 0(5)      |
| C11A | 15(6) | 92(10)   | 57(6)  | -57(7)    | 7(5)    | -5(6)     |
| C12A | 36(7) | 61(8)    | 40(6)  | -12(6)    | 12(5)   | -19(6)    |
| F19A | 76(4) | 63(3)    | 43(3)  | -10(2)    | -9(3)   | 13(3)     |
| F20A | 62(4) | 65(4)    | 87(4)  | 12(3)     | 8(3)    | 21(3)     |
| F21A | 69(4) | 61(3)    | 63(3)  | 14(3)     | -9(3)   | 29(3)     |
| F22A | 77(4) | 53(3)    | 34(2)  | -12(2)    | 4(2)    | 12(3)     |
| F23A | 60(3) | 46(3)    | 66(3)  | -8(2)     | 3(3)    | 10(2)     |
| F24A | 59(3) | 48(3)    | 36(3)  | -2(2)     | 0(2)    | -8(2)     |
| F25A | 47(3) | 74(4)    | 61(3)  | 21(3)     | 10(2)   | 9(3)      |
| F26A | 30(2) | 83(5)    | 70(3)  | -21(4)    | -1(2)   | -9(3)     |



|      |       |       |          |          |          |          |
|------|-------|-------|----------|----------|----------|----------|
| F27A | 56(3) | 57(3) | 48(3)    | -3(2)    | 19(2)    | 12(2)    |
| O3C  | 46(2) | 53(2) | 40(2)    | -9.7(18) | 5.1(17)  | 19.8(18) |
| C9C  | 22(4) | 52(4) | 36(3)    | -8(3)    | 2(3)     | 11(3)    |
| C10C | 48(6) | 64(7) | 57(5)    | 3(5)     | 21(4)    | 10(5)    |
| C11C | 64(6) | 33(4) | 43(5)    | -2(4)    | 8(4)     | 18(4)    |
| C12C | 54(5) | 46(5) | 60(6)    | -1(4)    | 25(5)    | 5(4)     |
| F19C | 76(4) | 63(3) | 43(3)    | -10(2)   | -9(3)    | 13(3)    |
| F20C | 62(4) | 65(4) | 87(4)    | 12(3)    | 8(3)     | 21(3)    |
| F21C | 69(4) | 61(3) | 63(3)    | 14(3)    | -9(3)    | 29(3)    |
| F22C | 77(4) | 53(3) | 34(2)    | -12(2)   | 4(2)     | 12(3)    |
| F23C | 60(3) | 46(3) | 66(3)    | -8(2)    | 3(3)     | 10(2)    |
| F24C | 59(3) | 48(3) | 36(3)    | -2(2)    | 0(2)     | -8(2)    |
| F25C | 47(3) | 74(4) | 61(3)    | 21(3)    | 10(2)    | 9(3)     |
| F26C | 30(2) | 83(5) | 70(3)    | -21(4)   | -1(2)    | -9(3)    |
| F27C | 56(3) | 57(3) | 48(3)    | -3(2)    | 19(2)    | 12(2)    |
| O4A  | 37(2) | 51(2) | 26.7(15) | 2.5(14)  | 2.9(14)  | -0.3(16) |
| C13A | 40(3) | 46(3) | 30(2)    | 1(2)     | 2(2)     | 1(2)     |
| C14A | 49(3) | 64(4) | 43(3)    | 1(3)     | 1(2)     | -4(3)    |
| C15A | 47(3) | 55(3) | 36(2)    | -3(2)    | 4(2)     | 6(2)     |
| C16A | 56(4) | 56(3) | 41(3)    | 0(3)     | 13(3)    | 4(3)     |
| F28A | 49(2) | 93(3) | 53(2)    | -8(2)    | 1(2)     | 8(2)     |
| F29A | 62(3) | 95(3) | 58(3)    | -4(2)    | -9(2)    | -5(2)    |
| F30A | 53(3) | 86(3) | 53(2)    | -6(2)    | 5(2)     | -19(2)   |
| F31A | 62(3) | 60(3) | 30(2)    | -0.9(19) | 1.6(19)  | -1(2)    |
| F32A | 70(3) | 67(3) | 54(3)    | -7(2)    | -1(2)    | -2(2)    |
| F33A | 56(2) | 54(3) | 46(2)    | 0(2)     | 15.3(18) | 9(2)     |
| F34A | 75(3) | 62(3) | 60(2)    | -3(2)    | 6(2)     | 22(2)    |
| F35A | 85(3) | 84(3) | 72(3)    | 9(2)     | -13(2)   | 26(2)    |
| F36A | 73(3) | 59(2) | 54(2)    | 13.6(19) | 20(3)    | 1(3)     |
| O4C  | 37(2) | 51(2) | 26.7(15) | 2.5(14)  | 2.9(14)  | -0.3(16) |
| C13C | 40(3) | 46(3) | 30(2)    | 1(2)     | 2(2)     | 1(2)     |
| C14C | 49(3) | 64(4) | 43(3)    | 1(3)     | 1(2)     | -4(3)    |
| C15C | 47(3) | 55(3) | 36(2)    | -3(2)    | 4(2)     | 6(2)     |
| C16C | 56(4) | 56(3) | 41(3)    | 0(3)     | 13(3)    | 4(3)     |
| F28C | 49(2) | 93(3) | 53(2)    | -8(2)    | 1(2)     | 8(2)     |
| F29C | 62(3) | 95(3) | 58(3)    | -4(2)    | -9(2)    | -5(2)    |
| F30C | 53(3) | 86(3) | 53(2)    | -6(2)    | 5(2)     | -19(2)   |
| F31C | 62(3) | 60(3) | 30(2)    | -0.9(19) | 1.6(19)  | -1(2)    |
| F32C | 70(3) | 67(3) | 54(3)    | -7(2)    | -1(2)    | -2(2)    |
| F33C | 56(2) | 54(3) | 46(2)    | 0(2)     | 15.3(18) | 9(2)     |
| F34C | 75(3) | 62(3) | 60(2)    | -3(2)    | 6(2)     | 22(2)    |
| F35C | 85(3) | 84(3) | 72(3)    | 9(2)     | -13(2)   | 26(2)    |

|      |          |          |          |           |          |           |
|------|----------|----------|----------|-----------|----------|-----------|
| F36C | 73(3)    | 59(2)    | 54(2)    | 13.6(19)  | 20(3)    | 1(3)      |
| C101 | 48(3)    | 46(3)    | 28(2)    | -8(2)     | 9(2)     | -8(2)     |
| C102 | 48(3)    | 53(3)    | 26(2)    | -3(2)     | 14(2)    | 1(2)      |
| O103 | 34.2(19) | 43(2)    | 47(2)    | -11.5(16) | 17.3(16) | -5.2(15)  |
| C104 | 33(3)    | 66(4)    | 44(3)    | 1(3)      | 19(2)    | -6(2)     |
| C105 | 39(3)    | 64(4)    | 60(4)    | -2(3)     | 22(3)    | -12(3)    |
| O106 | 30.5(18) | 45(2)    | 40.5(19) | 4.0(15)   | 5.1(15)  | -10.7(15) |
| C107 | 34(3)    | 56(3)    | 65(4)    | -13(3)    | 6(3)     | -18(3)    |
| C108 | 41(3)    | 55(3)    | 49(3)    | -5(3)     | -9(3)    | -21(3)    |
| O109 | 31.3(18) | 46(2)    | 37.7(19) | -11.5(15) | 0.4(15)  | -7.3(15)  |
| C110 | 58(3)    | 51(3)    | 31(3)    | -11(2)    | -1(2)    | -20(3)    |
| C111 | 47(3)    | 47(3)    | 43(3)    | -20(2)    | 7(2)     | -4(2)     |
| O112 | 35.9(18) | 37.9(18) | 23.8(15) | -5.3(13)  | 4.2(13)  | -6.8(14)  |
| C113 | 33(3)    | 57(3)    | 37(3)    | -11(2)    | 16(2)    | -1(2)     |
| C114 | 38(3)    | 54(3)    | 30(2)    | 0(2)      | 12(2)    | -14(2)    |
| O115 | 35.5(18) | 43.2(19) | 33.2(17) | -9.3(14)  | 10.7(14) | -13.7(15) |
| C116 | 28(2)    | 35(2)    | 35(2)    | -3.2(19)  | 2.5(19)  | -11.4(19) |
| C117 | 38(3)    | 44(3)    | 42(3)    | -9(2)     | 2(2)     | -12(2)    |
| O118 | 30.0(17) | 44.0(18) | 19.5(15) | -0.6(13)  | 3.1(12)  | -4.2(14)  |
| C201 | 56(4)    | 41(3)    | 33(3)    | 7(3)      | 12(3)    | 12(3)     |
| C202 | 43(3)    | 52(4)    | 27(3)    | 6(3)      | 4(3)     | 13(3)     |
| O203 | 34(2)    | 43(2)    | 33(2)    | 1.5(18)   | 5.9(18)  | 5.6(19)   |
| C204 | 28(3)    | 62(4)    | 34(3)    | -1(3)     | -3(3)    | -2(3)     |
| C205 | 31(3)    | 60(4)    | 38(3)    | -4(3)     | 5(3)     | -10(3)    |
| O206 | 34(2)    | 44(2)    | 36(2)    | -3.1(18)  | 5.6(18)  | -6.4(18)  |
| C207 | 45(4)    | 34(3)    | 58(4)    | -6(3)     | 20(3)    | -10(3)    |
| C208 | 51(4)    | 36(3)    | 53(4)    | 3(3)      | 26(3)    | -10(3)    |
| O209 | 46(2)    | 37(2)    | 33(2)    | 1.3(17)   | 9.3(19)  | -3.2(19)  |
| C210 | 57(4)    | 50(4)    | 30(3)    | 5(3)      | 5(3)     | 16(3)     |
| C211 | 46(4)    | 54(4)    | 33(3)    | -2(3)     | 3(3)     | 19(3)     |
| O212 | 33(2)    | 53(3)    | 34(2)    | -4.7(19)  | 3.2(18)  | 10.1(19)  |
| C213 | 26(3)    | 73(4)    | 45(4)    | -12(3)    | 5(3)     | -1(3)     |
| C214 | 32(3)    | 64(4)    | 43(4)    | -17(3)    | 4(3)     | -8(3)     |
| O215 | 35(2)    | 43(2)    | 41(2)    | -17.1(19) | 7.9(19)  | -9.5(18)  |
| C216 | 52(4)    | 37(3)    | 46(4)    | -14(3)    | 19(3)    | -14(3)    |
| C217 | 55(4)    | 31(3)    | 42(3)    | -7(3)     | 26(3)    | -11(3)    |
| O218 | 43(2)    | 34(2)    | 32(2)    | 1.3(17)   | 12.6(18) | -2.1(18)  |
| C401 | 56(4)    | 41(3)    | 33(3)    | 7(3)      | 12(3)    | 12(3)     |
| C402 | 43(3)    | 52(4)    | 27(3)    | 6(3)      | 4(3)     | 13(3)     |
| O403 | 34(2)    | 43(2)    | 33(2)    | 1.5(18)   | 5.9(18)  | 5.6(19)   |
| C404 | 28(3)    | 62(4)    | 34(3)    | -1(3)     | -3(3)    | -2(3)     |
| C405 | 31(3)    | 60(4)    | 38(3)    | -4(3)     | 5(3)     | -10(3)    |

|      |       |       |       |           |          |          |
|------|-------|-------|-------|-----------|----------|----------|
| O406 | 34(2) | 44(2) | 36(2) | -3.1(18)  | 5.6(18)  | -6.4(18) |
| C407 | 45(4) | 34(3) | 58(4) | -6(3)     | 20(3)    | -10(3)   |
| C408 | 51(4) | 36(3) | 53(4) | 3(3)      | 26(3)    | -10(3)   |
| O409 | 46(2) | 37(2) | 33(2) | 1.3(17)   | 9.3(19)  | -3.2(19) |
| C410 | 57(4) | 50(4) | 30(3) | 5(3)      | 5(3)     | 16(3)    |
| C411 | 46(4) | 54(4) | 33(3) | -2(3)     | 3(3)     | 19(3)    |
| O412 | 33(2) | 53(3) | 34(2) | -4.7(19)  | 3.2(18)  | 10.1(19) |
| C413 | 26(3) | 73(4) | 45(4) | -12(3)    | 5(3)     | -1(3)    |
| C414 | 32(3) | 64(4) | 43(4) | -17(3)    | 4(3)     | -8(3)    |
| O415 | 35(2) | 43(2) | 41(2) | -17.1(19) | 7.9(19)  | -9.5(18) |
| C416 | 52(4) | 37(3) | 46(4) | -14(3)    | 19(3)    | -14(3)   |
| C417 | 55(4) | 31(3) | 42(3) | -7(3)     | 26(3)    | -11(3)   |
| O418 | 43(2) | 34(2) | 32(2) | 1.3(17)   | 12.6(18) | -2.1(18) |
| F501 | 30(2) | 81(3) | 54(3) | 13(2)     | 1.1(19)  | 7(2)     |
| C501 | 25(3) | 37(4) | 37(3) | 0(3)      | -2(3)    | 5(3)     |
| C502 | 25(3) | 40(4) | 37(3) | -2(3)     | 3(3)     | -4(3)    |
| C503 | 38(4) | 41(4) | 32(3) | -6(3)     | -1(2)    | -6(3)    |
| C504 | 30(3) | 35(3) | 39(3) | -13(3)    | -9(3)    | -2(3)    |
| C505 | 24(3) | 33(3) | 44(4) | -4(3)     | 1(3)     | -3(3)    |
| C506 | 30(3) | 31(3) | 38(3) | 6(3)      | 7(2)     | 9(3)     |
| F511 | 30(2) | 81(3) | 54(3) | 13(2)     | 1.1(19)  | 7(2)     |
| C511 | 25(3) | 37(4) | 37(3) | 0(3)      | -2(3)    | 5(3)     |
| C512 | 25(3) | 40(4) | 37(3) | -2(3)     | 3(3)     | -4(3)    |
| C513 | 38(4) | 41(4) | 32(3) | -6(3)     | -1(2)    | -6(3)    |
| C514 | 30(3) | 35(3) | 39(3) | -13(3)    | -9(3)    | -2(3)    |
| C515 | 24(3) | 33(3) | 44(4) | -4(3)     | 1(3)     | -3(3)    |
| C516 | 30(3) | 31(3) | 38(3) | 6(3)      | 7(2)     | 9(3)     |
| F601 | 88(4) | 64(3) | 50(3) | -4(2)     | 4(3)     | 4(3)     |
| C601 | 24(4) | 38(4) | 28(3) | 2(3)      | 0(3)     | 4(3)     |
| C602 | 24(4) | 31(3) | 39(4) | 0(3)      | 2(3)     | 5(3)     |
| C603 | 28(3) | 35(4) | 41(4) | 1(3)      | 9(3)     | 6(3)     |
| C604 | 41(4) | 28(4) | 39(4) | 1(3)      | 9(3)     | 2(3)     |
| C605 | 40(4) | 27(3) | 24(4) | 6(3)      | -3(3)    | -2(3)    |
| C606 | 24(4) | 40(4) | 23(3) | 5(2)      | -1(3)    | -2(3)    |
| F611 | 88(4) | 64(3) | 50(3) | -4(2)     | 4(3)     | 4(3)     |
| C611 | 24(4) | 38(4) | 28(3) | 2(3)      | 0(3)     | 4(3)     |
| C612 | 24(4) | 31(3) | 39(4) | 0(3)      | 2(3)     | 5(3)     |
| C613 | 28(3) | 35(4) | 41(4) | 1(3)      | 9(3)     | 6(3)     |
| C614 | 41(4) | 28(4) | 39(4) | 1(3)      | 9(3)     | 2(3)     |
| C615 | 40(4) | 27(3) | 24(4) | 6(3)      | -3(3)    | -2(3)    |
| C616 | 24(4) | 40(4) | 23(3) | 5(2)      | -1(3)    | -2(3)    |
| F701 | 45(2) | 90(3) | 52(3) | 3(2)      | -2(2)    | -25(2)   |

|      |        |       |       |        |       |        |
|------|--------|-------|-------|--------|-------|--------|
| C701 | 30(3)  | 50(4) | 22(3) | 5(3)   | 3(2)  | 0(3)   |
| C702 | 27(3)  | 42(3) | 20(3) | -1(2)  | -6(2) | -5(2)  |
| C703 | 36(3)  | 36(3) | 24(3) | -2(2)  | 2(2)  | -9(2)  |
| C704 | 39(3)  | 35(3) | 31(3) | -6(3)  | 5(3)  | -2(3)  |
| C705 | 36(4)  | 34(3) | 38(3) | -9(2)  | 8(3)  | 6(2)   |
| C706 | 29(3)  | 50(4) | 30(3) | 2(3)   | 7(2)  | 7(2)   |
| F711 | 45(2)  | 90(3) | 52(3) | 3(2)   | -2(2) | -25(2) |
| C711 | 30(3)  | 50(4) | 22(3) | 5(3)   | 3(2)  | 0(3)   |
| C712 | 27(3)  | 42(3) | 20(3) | -1(2)  | -6(2) | -5(2)  |
| C713 | 36(3)  | 36(3) | 24(3) | -2(2)  | 2(2)  | -9(2)  |
| C714 | 39(3)  | 35(3) | 31(3) | -6(3)  | 5(3)  | -2(3)  |
| C715 | 36(4)  | 34(3) | 38(3) | -9(2)  | 8(3)  | 6(2)   |
| C716 | 29(3)  | 50(4) | 30(3) | 2(3)   | 7(2)  | 7(2)   |
| F801 | 138(4) | 88(3) | 97(3) | -6(3)  | 15(3) | 16(3)  |
| C801 | 57(3)  | 41(3) | 41(3) | -6(2)  | 12(2) | -2(2)  |
| C802 | 54(3)  | 51(3) | 46(3) | -10(2) | 17(2) | 0(2)   |
| C803 | 55(3)  | 49(3) | 38(3) | -3(2)  | 16(2) | -9(2)  |
| C804 | 63(3)  | 53(3) | 48(3) | 0(3)   | 9(3)  | -5(3)  |
| C805 | 58(3)  | 61(3) | 48(3) | -3(3)  | 8(3)  | -3(2)  |
| C806 | 53(3)  | 53(3) | 46(3) | -2(2)  | 8(3)  | -9(2)  |
| F811 | 138(4) | 88(3) | 97(3) | -6(3)  | 15(3) | 16(3)  |
| C811 | 57(3)  | 41(3) | 41(3) | -6(2)  | 12(2) | -2(2)  |
| C812 | 54(3)  | 51(3) | 46(3) | -10(2) | 17(2) | 0(2)   |
| C813 | 55(3)  | 49(3) | 38(3) | -3(2)  | 16(2) | -9(2)  |
| C814 | 63(3)  | 53(3) | 48(3) | 0(3)   | 9(3)  | -5(3)  |
| C815 | 58(3)  | 61(3) | 48(3) | -3(3)  | 8(3)  | -3(2)  |
| C816 | 53(3)  | 53(3) | 46(3) | -2(2)  | 8(3)  | -9(2)  |
| C901 | 77(5)  | 53(4) | 58(4) | -7(3)  | 9(3)  | -7(3)  |
| F901 | 101(7) | 86(6) | 81(6) | 17(5)  | 33(5) | -10(5) |
| C902 | 56(4)  | 57(4) | 74(4) | -2(3)  | 19(3) | 5(3)   |
| C903 | 55(4)  | 59(4) | 84(5) | -2(3)  | 5(4)  | 9(3)   |

#### 2.1.4. Bond Lengths

| Atom | Atom | Length/Å  | Atom | Atom | Length/Å  |
|------|------|-----------|------|------|-----------|
| A11  | O1   | 1.728(3)  | C12A | F27A | 1.314(11) |
| A11  | O2   | 1.731(3)  | O3C  | C9C  | 1.367(9)  |
| A11  | O3   | 1.709(5)  | C9C  | C10C | 1.564(10) |
| A11  | O3B  | 1.741(9)  | C9C  | C11C | 1.573(10) |
| A11  | O4   | 1.729(5)  | C9C  | C12C | 1.551(9)  |
| A11  | O4B  | 1.730(10) | C10C | F19C | 1.332(10) |
| O1   | C1   | 1.355(5)  | C10C | F20C | 1.343(10) |
| C1   | C2   | 1.549(6)  | C10C | F21C | 1.323(9)  |

|      |      |           |           |           |
|------|------|-----------|-----------|-----------|
| C1   | C3   | 1.556(6)  | C11C F22C | 1.337(9)  |
| C1   | C4   | 1.558(6)  | C11C F23C | 1.317(8)  |
| C2   | F1   | 1.328(5)  | C11C F24C | 1.273(9)  |
| C2   | F2   | 1.343(5)  | C12C F25C | 1.319(9)  |
| C2   | F3   | 1.337(5)  | C12C F26C | 1.337(9)  |
| C3   | F4   | 1.337(5)  | C12C F27C | 1.332(9)  |
| C3   | F5   | 1.335(6)  | O4A C13A  | 1.353(9)  |
| C3   | F6   | 1.320(6)  | C13A C14A | 1.528(10) |
| C4   | F7   | 1.338(5)  | C13A C15A | 1.573(10) |
| C4   | F8   | 1.322(6)  | C13A C16A | 1.542(10) |
| C4   | F9   | 1.328(6)  | C14A F28A | 1.361(9)  |
| O2   | C5   | 1.350(5)  | C14A F29A | 1.338(9)  |
| C5   | C6   | 1.549(6)  | C14A F30A | 1.334(9)  |
| C5   | C7   | 1.556(6)  | C15A F31A | 1.343(10) |
| C5   | C8   | 1.559(6)  | C15A F32A | 1.359(10) |
| C6   | F10  | 1.328(6)  | C15A F33A | 1.313(9)  |
| C6   | F11  | 1.349(5)  | C16A F34A | 1.329(9)  |
| C6   | F12  | 1.334(5)  | C16A F35A | 1.303(9)  |
| C7   | F13  | 1.339(5)  | C16A F36A | 1.357(10) |
| C7   | F14  | 1.334(5)  | O4C C13C  | 1.355(11) |
| C7   | F15  | 1.324(6)  | C13C C14C | 1.527(12) |
| C8   | F16  | 1.339(5)  | C13C C15C | 1.558(12) |
| C8   | F17  | 1.332(5)  | C13C C16C | 1.538(12) |
| C8   | F18  | 1.326(5)  | C14C F28C | 1.308(12) |
| O3   | C9   | 1.353(8)  | C14C F29C | 1.359(13) |
| C9   | C10  | 1.564(9)  | C14C F30C | 1.337(12) |
| C9   | C11  | 1.552(9)  | C15C F31C | 1.337(13) |
| C9   | C12  | 1.540(9)  | C15C F32C | 1.334(13) |
| C10  | F19  | 1.327(8)  | C15C F33C | 1.300(13) |
| C10  | F20  | 1.341(8)  | C16C F34C | 1.338(11) |
| C10  | F21  | 1.343(8)  | C16C F35C | 1.354(12) |
| C11  | F22  | 1.315(8)  | C16C F36C | 1.376(12) |
| C11  | F23  | 1.362(8)  | C101 C102 | 1.468(7)  |
| C11  | F24  | 1.330(8)  | C101 O118 | 1.411(5)  |
| C12  | F25  | 1.348(8)  | C102 O103 | 1.408(6)  |
| C12  | F26  | 1.359(8)  | O103 C104 | 1.395(6)  |
| C12  | F27  | 1.350(8)  | C104 C105 | 1.447(8)  |
| O3B  | C9B  | 1.369(12) | C105 O106 | 1.428(6)  |
| C9B  | C10B | 1.555(12) | O106 C107 | 1.407(6)  |
| C9B  | C11B | 1.556(12) | C107 C108 | 1.449(8)  |
| C9B  | C12B | 1.545(12) | C108 O109 | 1.412(6)  |
| C10B | F19B | 1.315(12) | O109 C110 | 1.394(6)  |

|      |      |           |      |      |           |
|------|------|-----------|------|------|-----------|
| C10B | F20B | 1.352(12) | C110 | C111 | 1.460(7)  |
| C10B | F21B | 1.353(12) | C111 | O112 | 1.400(6)  |
| C11B | F22B | 1.323(11) | O112 | C113 | 1.395(6)  |
| C11B | F23B | 1.315(12) | C113 | C114 | 1.468(7)  |
| C11B | F24B | 1.337(12) | C114 | O115 | 1.391(6)  |
| C12B | F25B | 1.320(11) | O115 | C116 | 1.398(5)  |
| C12B | F26B | 1.338(11) | C116 | C117 | 1.479(7)  |
| C12B | F27B | 1.353(11) | C117 | O118 | 1.403(6)  |
| O4   | C13  | 1.356(7)  | C201 | C202 | 1.503(9)  |
| C13  | C14  | 1.552(8)  | C201 | O218 | 1.430(8)  |
| C13  | C15  | 1.554(8)  | C202 | O203 | 1.413(7)  |
| C13  | C16  | 1.559(8)  | O203 | C204 | 1.418(8)  |
| C14  | F28  | 1.292(8)  | C204 | C205 | 1.483(9)  |
| C14  | F29  | 1.350(8)  | C205 | O206 | 1.425(8)  |
| C14  | F30  | 1.367(7)  | O206 | C207 | 1.421(8)  |
| C15  | F31  | 1.357(7)  | C207 | C208 | 1.471(10) |
| C15  | F32  | 1.322(8)  | C208 | O209 | 1.427(7)  |
| C15  | F33  | 1.319(7)  | O209 | C210 | 1.418(7)  |
| C16  | F34  | 1.352(7)  | C210 | C211 | 1.479(9)  |
| C16  | F35  | 1.300(7)  | C211 | O212 | 1.411(8)  |
| C16  | F36  | 1.329(8)  | O212 | C213 | 1.426(8)  |
| O4B  | C13B | 1.352(12) | C213 | C214 | 1.492(9)  |
| C13B | C14B | 1.554(12) | C214 | O215 | 1.412(8)  |
| C13B | C15B | 1.556(12) | O215 | C216 | 1.429(8)  |
| C13B | C16B | 1.553(12) | C216 | C217 | 1.500(9)  |
| C14B | F28B | 1.360(12) | C217 | O218 | 1.417(7)  |
| C14B | F29B | 1.348(13) | C401 | C402 | 1.481(18) |
| C14B | F30B | 1.348(12) | C401 | O418 | 1.418(17) |
| C15B | F31B | 1.371(12) | C402 | O403 | 1.428(17) |
| C15B | F32B | 1.328(13) | O403 | C404 | 1.417(17) |
| C15B | F33B | 1.329(12) | C404 | C405 | 1.463(18) |
| C16B | F34B | 1.352(12) | C405 | O406 | 1.430(18) |
| C16B | F35B | 1.325(12) | O406 | C407 | 1.410(17) |
| C16B | F36B | 1.330(13) | C407 | C408 | 1.469(18) |
| AllA | O1A  | 1.732(6)  | C408 | O409 | 1.444(17) |
| AllA | O1C  | 1.715(8)  | O409 | C410 | 1.405(17) |
| AllA | O2A  | 1.722(7)  | C410 | C411 | 1.455(17) |
| AllA | O2C  | 1.696(8)  | C411 | O412 | 1.410(17) |
| AllA | O3A  | 1.723(8)  | O412 | C413 | 1.406(18) |
| AllA | O3C  | 1.739(6)  | C413 | C414 | 1.477(18) |
| AllA | O4A  | 1.708(6)  | C414 | O415 | 1.415(17) |
| AllA | O4C  | 1.742(8)  | O415 | C416 | 1.404(18) |

|     |      |           |      |      |           |
|-----|------|-----------|------|------|-----------|
| O1A | C1A  | 1.344(8)  | C416 | C417 | 1.489(17) |
| C1A | C2A  | 1.553(9)  | C417 | O418 | 1.416(17) |
| C1A | C3A  | 1.557(9)  | F501 | C501 | 1.320(6)  |
| C1A | C4A  | 1.541(9)  | C501 | C502 | 1.3900    |
| C2A | F1A  | 1.339(9)  | C501 | C506 | 1.3900    |
| C2A | F2A  | 1.344(9)  | C502 | C503 | 1.3900    |
| C2A | F3A  | 1.334(9)  | C503 | C504 | 1.3900    |
| C3A | F4A  | 1.339(9)  | C504 | C505 | 1.3900    |
| C3A | F5A  | 1.335(9)  | C505 | C506 | 1.3900    |
| C3A | F6A  | 1.313(10) | F511 | C511 | 1.283(12) |
| C4A | F7A  | 1.324(9)  | C511 | C512 | 1.3900    |
| C4A | F8A  | 1.332(9)  | C511 | C516 | 1.3900    |
| C4A | F9A  | 1.323(9)  | C512 | C513 | 1.3900    |
| O1C | C1C  | 1.343(11) | C513 | C514 | 1.3900    |
| C1C | C2C  | 1.553(12) | C514 | C515 | 1.3900    |
| C1C | C3C  | 1.546(11) | C515 | C516 | 1.3900    |
| C1C | C4C  | 1.542(12) | F601 | C601 | 1.298(8)  |
| C2C | F1C  | 1.325(12) | C601 | C602 | 1.3900    |
| C2C | F2C  | 1.321(12) | C601 | C606 | 1.3900    |
| C2C | F3C  | 1.324(12) | C602 | C603 | 1.3900    |
| C3C | F4C  | 1.352(12) | C603 | C604 | 1.3900    |
| C3C | F5C  | 1.329(11) | C604 | C605 | 1.3900    |
| C3C | F6C  | 1.306(12) | C605 | C606 | 1.3900    |
| C4C | F7C  | 1.339(12) | F611 | C611 | 1.304(10) |
| C4C | F8C  | 1.334(12) | C611 | C612 | 1.3900    |
| C4C | F9C  | 1.343(12) | C611 | C616 | 1.3900    |
| O2A | C5A  | 1.366(10) | C612 | C613 | 1.3900    |
| C5A | C6A  | 1.576(11) | C613 | C614 | 1.3900    |
| C5A | C7A  | 1.554(10) | C614 | C615 | 1.3900    |
| C5A | C8A  | 1.541(10) | C615 | C616 | 1.3900    |
| C6A | F10A | 1.332(11) | F701 | C701 | 1.302(5)  |
| C6A | F11A | 1.364(10) | C701 | C702 | 1.3900    |
| C6A | F12A | 1.305(10) | C701 | C706 | 1.3900    |
| C7A | F13A | 1.355(11) | C702 | C703 | 1.3900    |
| C7A | F14A | 1.350(11) | C703 | C704 | 1.3900    |
| C7A | F15A | 1.311(11) | C704 | C705 | 1.3900    |
| C8A | F16A | 1.345(11) | C705 | C706 | 1.3900    |
| C8A | F17A | 1.334(9)  | F711 | C711 | 1.335(14) |
| C8A | F18A | 1.354(10) | C711 | C712 | 1.3900    |
| O2C | C5C  | 1.360(11) | C711 | C716 | 1.3900    |
| C5C | C6C  | 1.559(12) | C712 | C713 | 1.3900    |
| C5C | C7C  | 1.551(12) | C713 | C714 | 1.3900    |

|      |      |           |      |                   |           |
|------|------|-----------|------|-------------------|-----------|
| C5C  | C8C  | 1.548(11) | C714 | C715              | 1.3900    |
| C6C  | F10C | 1.331(12) | C715 | C716              | 1.3900    |
| C6C  | F11C | 1.319(12) | F801 | C801              | 1.322(7)  |
| C6C  | F12C | 1.344(12) | C801 | C802              | 1.3900    |
| C7C  | F13C | 1.330(11) | C801 | C806              | 1.3900    |
| C7C  | F14C | 1.343(11) | C802 | C803              | 1.3900    |
| C7C  | F15C | 1.306(12) | C803 | C804              | 1.3900    |
| C8C  | F16C | 1.335(11) | C804 | C805              | 1.3900    |
| C8C  | F17C | 1.339(11) | C805 | C806              | 1.3900    |
| C8C  | F18C | 1.341(12) | F811 | C811              | 1.322(11) |
| O3A  | C9A  | 1.341(11) | C811 | C812              | 1.3900    |
| C9A  | C10A | 1.558(12) | C811 | C816              | 1.3900    |
| C9A  | C11A | 1.545(11) | C812 | C813              | 1.3900    |
| C9A  | C12A | 1.550(11) | C813 | C814              | 1.3900    |
| C10A | F19A | 1.343(11) | C814 | C815              | 1.3900    |
| C10A | F20A | 1.304(12) | C815 | C816              | 1.3900    |
| C10A | F21A | 1.340(13) | C901 | F901              | 1.356(9)  |
| C11A | F22A | 1.374(11) | C901 | C902              | 1.359(9)  |
| C11A | F23A | 1.319(11) | C901 | C903 <sup>1</sup> | 1.375(10) |
| C11A | F24A | 1.303(12) | C902 | C903              | 1.240(10) |
| C12A | F25A | 1.328(11) | C903 | C901 <sup>1</sup> | 1.376(10) |
| C12A | F26A | 1.336(11) |      |                   |           |

### 2.1.5. Bond Angles

| Atom | Atom | Atom | Angle/°    | Atom | Atom | Atom | Angle/°   |
|------|------|------|------------|------|------|------|-----------|
| O1   | Al1  | O2   | 107.53(15) | F14A | C7A  | F13A | 105.3(8)  |
| O1   | Al1  | O3B  | 106.0(5)   | F15A | C7A  | C5A  | 110.4(8)  |
| O1   | Al1  | O4   | 114.2(3)   | F15A | C7A  | F13A | 111.6(8)  |
| O1   | Al1  | O4B  | 112.0(5)   | F15A | C7A  | F14A | 107.7(9)  |
| O2   | Al1  | O3B  | 116.3(6)   | F16A | C8A  | C5A  | 109.0(8)  |
| O3   | Al1  | O1   | 107.5(3)   | F16A | C8A  | F18A | 106.9(8)  |
| O3   | Al1  | O2   | 112.7(3)   | F17A | C8A  | C5A  | 111.1(7)  |
| O3   | Al1  | O3B  | 3.7(9)     | F17A | C8A  | F16A | 110.6(9)  |
| O3   | Al1  | O4   | 109.2(3)   | F17A | C8A  | F18A | 108.4(8)  |
| O3   | Al1  | O4B  | 109.9(5)   | F18A | C8A  | C5A  | 110.7(8)  |
| O4   | Al1  | O2   | 105.8(2)   | C5C  | O2C  | Al1A | 158.1(11) |
| O4   | Al1  | O3B  | 107.2(5)   | O2C  | C5C  | C6C  | 106.7(10) |
| O4   | Al1  | O4B  | 2.2(7)     | O2C  | C5C  | C7C  | 112.0(9)  |
| O4B  | Al1  | O2   | 107.2(5)   | O2C  | C5C  | C8C  | 107.2(9)  |
| O4B  | Al1  | O3B  | 107.8(6)   | C7C  | C5C  | C6C  | 109.8(8)  |
| C1   | O1   | Al1  | 147.0(3)   | C8C  | C5C  | C6C  | 111.9(8)  |
| O1   | C1   | C2   | 108.0(3)   | C8C  | C5C  | C7C  | 109.3(8)  |



|     |    |     |          |      |      |      |           |
|-----|----|-----|----------|------|------|------|-----------|
| O1  | C1 | C3  | 110.1(3) | F10C | C6C  | C5C  | 109.1(9)  |
| O1  | C1 | C4  | 111.5(3) | F10C | C6C  | F12C | 108.8(10) |
| C2  | C1 | C3  | 109.0(4) | F11C | C6C  | C5C  | 110.9(9)  |
| C2  | C1 | C4  | 109.5(4) | F11C | C6C  | F10C | 111.3(10) |
| C3  | C1 | C4  | 108.7(4) | F11C | C6C  | F12C | 106.1(10) |
| F1  | C2 | C1  | 111.4(4) | F12C | C6C  | C5C  | 110.6(9)  |
| F1  | C2 | F2  | 107.5(4) | F13C | C7C  | C5C  | 110.0(9)  |
| F1  | C2 | F3  | 107.6(4) | F13C | C7C  | F14C | 108.8(8)  |
| F2  | C2 | C1  | 112.4(4) | F14C | C7C  | C5C  | 110.4(9)  |
| F3  | C2 | C1  | 110.6(4) | F15C | C7C  | C5C  | 108.5(9)  |
| F3  | C2 | F2  | 107.2(4) | F15C | C7C  | F13C | 108.5(10) |
| F4  | C3 | C1  | 112.6(4) | F15C | C7C  | F14C | 110.6(11) |
| F5  | C3 | C1  | 110.1(4) | F16C | C8C  | C5C  | 112.5(9)  |
| F5  | C3 | F4  | 107.2(4) | F16C | C8C  | F17C | 105.7(10) |
| F6  | C3 | C1  | 111.0(4) | F16C | C8C  | F18C | 107.6(10) |
| F6  | C3 | F4  | 108.0(4) | F17C | C8C  | C5C  | 110.1(9)  |
| F6  | C3 | F5  | 107.8(4) | F17C | C8C  | F18C | 108.0(10) |
| F7  | C4 | C1  | 111.6(4) | F18C | C8C  | C5C  | 112.6(10) |
| F8  | C4 | C1  | 111.1(4) | C9A  | O3A  | Al1A | 148.2(11) |
| F8  | C4 | F7  | 107.6(4) | O3A  | C9A  | C10A | 102.3(10) |
| F8  | C4 | F9  | 108.6(4) | O3A  | C9A  | C11A | 115.6(10) |
| F9  | C4 | C1  | 110.2(4) | O3A  | C9A  | C12A | 107.9(9)  |
| F9  | C4 | F7  | 107.5(4) | C11A | C9A  | C10A | 110.0(9)  |
| C5  | O2 | Al1 | 146.0(3) | C11A | C9A  | C12A | 111.2(8)  |
| O2  | C5 | C6  | 111.1(3) | C12A | C9A  | C10A | 109.5(8)  |
| O2  | C5 | C7  | 107.6(3) | F19A | C10A | C9A  | 109.8(9)  |
| O2  | C5 | C8  | 110.2(3) | F20A | C10A | C9A  | 111.4(10) |
| C6  | C5 | C7  | 109.6(4) | F20A | C10A | F19A | 112.3(10) |
| C6  | C5 | C8  | 109.4(4) | F20A | C10A | F21A | 105.4(10) |
| C7  | C5 | C8  | 108.9(3) | F21A | C10A | C9A  | 113.3(10) |
| F10 | C6 | C5  | 111.9(4) | F21A | C10A | F19A | 104.3(10) |
| F10 | C6 | F11 | 106.8(4) | F22A | C11A | C9A  | 110.8(9)  |
| F10 | C6 | F12 | 107.9(4) | F23A | C11A | C9A  | 116.1(9)  |
| F11 | C6 | C5  | 112.6(4) | F23A | C11A | F22A | 108.5(9)  |
| F12 | C6 | C5  | 110.8(4) | F24A | C11A | C9A  | 111.4(9)  |
| F12 | C6 | F11 | 106.7(4) | F24A | C11A | F22A | 105.4(9)  |
| F13 | C7 | C5  | 110.5(4) | F24A | C11A | F23A | 104.0(10) |
| F14 | C7 | C5  | 112.3(4) | F25A | C12A | C9A  | 111.9(9)  |
| F14 | C7 | F13 | 107.3(4) | F25A | C12A | F26A | 106.8(9)  |
| F15 | C7 | C5  | 111.4(4) | F26A | C12A | C9A  | 111.1(9)  |
| F15 | C7 | F13 | 107.3(4) | F27A | C12A | C9A  | 111.6(9)  |
| F15 | C7 | F14 | 107.8(4) | F27A | C12A | F25A | 109.4(9)  |

|      |      |      |           |      |      |      |          |
|------|------|------|-----------|------|------|------|----------|
| F16  | C8   | C5   | 112.6(4)  | F27A | C12A | F26A | 105.7(9) |
| F17  | C8   | C5   | 110.8(4)  | C9C  | O3C  | A11A | 145.6(8) |
| F17  | C8   | F16  | 107.7(4)  | O3C  | C9C  | C10C | 113.9(7) |
| F18  | C8   | C5   | 110.3(3)  | O3C  | C9C  | C11C | 114.8(7) |
| F18  | C8   | F16  | 107.7(4)  | O3C  | C9C  | C12C | 106.9(7) |
| F18  | C8   | F17  | 107.4(4)  | C10C | C9C  | C11C | 106.0(7) |
| C9   | O3   | A11  | 151.5(6)  | C12C | C9C  | C10C | 107.0(6) |
| O3   | C9   | C10  | 107.9(6)  | C12C | C9C  | C11C | 107.8(6) |
| O3   | C9   | C11  | 112.9(6)  | F19C | C10C | C9C  | 109.6(7) |
| O3   | C9   | C12  | 108.6(7)  | F19C | C10C | F20C | 105.3(7) |
| C11  | C9   | C10  | 108.7(6)  | F20C | C10C | C9C  | 108.0(7) |
| C12  | C9   | C10  | 109.3(6)  | F21C | C10C | C9C  | 115.6(7) |
| C12  | C9   | C11  | 109.4(6)  | F21C | C10C | F19C | 108.4(7) |
| F19  | C10  | C9   | 110.4(6)  | F21C | C10C | F20C | 109.5(8) |
| F19  | C10  | F20  | 109.5(6)  | F22C | C11C | C9C  | 107.6(7) |
| F19  | C10  | F21  | 107.8(6)  | F23C | C11C | C9C  | 114.6(7) |
| F20  | C10  | C9   | 110.6(6)  | F23C | C11C | F22C | 107.7(6) |
| F20  | C10  | F21  | 108.0(6)  | F24C | C11C | C9C  | 109.9(6) |
| F21  | C10  | C9   | 110.3(6)  | F24C | C11C | F22C | 107.9(7) |
| F22  | C11  | C9   | 111.2(6)  | F24C | C11C | F23C | 108.9(7) |
| F22  | C11  | F23  | 107.7(6)  | F25C | C12C | C9C  | 110.7(7) |
| F22  | C11  | F24  | 106.7(6)  | F25C | C12C | F26C | 109.7(8) |
| F23  | C11  | C9   | 111.6(6)  | F25C | C12C | F27C | 105.3(7) |
| F24  | C11  | C9   | 110.0(6)  | F26C | C12C | C9C  | 109.7(7) |
| F24  | C11  | F23  | 109.5(6)  | F27C | C12C | C9C  | 113.9(7) |
| F25  | C12  | C9   | 110.8(6)  | F27C | C12C | F26C | 107.3(7) |
| F25  | C12  | F26  | 107.8(6)  | C13A | O4A  | A11A | 145.1(7) |
| F25  | C12  | F27  | 107.7(6)  | O4A  | C13A | C14A | 110.9(7) |
| F26  | C12  | C9   | 109.1(6)  | O4A  | C13A | C15A | 106.6(7) |
| F27  | C12  | C9   | 112.9(6)  | O4A  | C13A | C16A | 111.2(7) |
| F27  | C12  | F26  | 108.4(6)  | C14A | C13A | C15A | 108.1(6) |
| C9B  | O3B  | A11  | 144.0(11) | C14A | C13A | C16A | 110.2(7) |
| O3B  | C9B  | C10B | 105.1(10) | C16A | C13A | C15A | 109.7(6) |
| O3B  | C9B  | C11B | 114.2(10) | F28A | C14A | C13A | 109.5(7) |
| O3B  | C9B  | C12B | 110.3(9)  | F29A | C14A | C13A | 112.4(7) |
| C10B | C9B  | C11B | 108.7(9)  | F29A | C14A | F28A | 105.8(7) |
| C12B | C9B  | C10B | 109.5(9)  | F30A | C14A | C13A | 113.2(7) |
| C12B | C9B  | C11B | 109.1(8)  | F30A | C14A | F28A | 107.5(7) |
| F19B | C10B | C9B  | 111.4(9)  | F30A | C14A | F29A | 108.1(7) |
| F19B | C10B | F20B | 111.9(10) | F31A | C15A | C13A | 110.1(7) |
| F19B | C10B | F21B | 108.8(10) | F31A | C15A | F32A | 108.6(8) |
| F20B | C10B | C9B  | 111.0(10) | F32A | C15A | C13A | 110.3(7) |

|      |      |      |           |      |      |      |           |
|------|------|------|-----------|------|------|------|-----------|
| F20B | C10B | F21B | 104.3(10) | F33A | C15A | C13A | 111.9(7)  |
| F21B | C10B | C9B  | 109.2(9)  | F33A | C15A | F31A | 108.9(8)  |
| F22B | C11B | C9B  | 111.9(9)  | F33A | C15A | F32A | 107.0(8)  |
| F22B | C11B | F24B | 109.7(10) | F34A | C16A | C13A | 109.9(7)  |
| F23B | C11B | C9B  | 113.8(10) | F34A | C16A | F36A | 107.7(7)  |
| F23B | C11B | F22B | 108.1(9)  | F35A | C16A | C13A | 113.5(7)  |
| F23B | C11B | F24B | 104.0(9)  | F35A | C16A | F34A | 110.3(7)  |
| F24B | C11B | C9B  | 108.9(9)  | F35A | C16A | F36A | 106.5(8)  |
| F25B | C12B | C9B  | 112.3(9)  | F36A | C16A | C13A | 108.7(6)  |
| F25B | C12B | F26B | 104.5(9)  | C13C | O4C  | Al1A | 149.3(11) |
| F25B | C12B | F27B | 108.0(9)  | O4C  | C13C | C14C | 111.9(10) |
| F26B | C12B | C9B  | 115.2(10) | O4C  | C13C | C15C | 110.2(10) |
| F26B | C12B | F27B | 106.0(10) | O4C  | C13C | C16C | 109.4(10) |
| F27B | C12B | C9B  | 110.3(9)  | C14C | C13C | C15C | 107.6(9)  |
| C13  | O4   | Al1  | 145.9(5)  | C14C | C13C | C16C | 109.1(9)  |
| O4   | C13  | C14  | 107.9(5)  | C16C | C13C | C15C | 108.6(9)  |
| O4   | C13  | C15  | 112.8(5)  | F28C | C14C | C13C | 112.6(10) |
| O4   | C13  | C16  | 110.1(6)  | F28C | C14C | F29C | 110.0(11) |
| C14  | C13  | C15  | 109.2(5)  | F28C | C14C | F30C | 108.4(10) |
| C14  | C13  | C16  | 108.5(5)  | F29C | C14C | C13C | 109.0(10) |
| C15  | C13  | C16  | 108.2(5)  | F30C | C14C | C13C | 112.1(10) |
| F28  | C14  | C13  | 112.4(5)  | F30C | C14C | F29C | 104.5(11) |
| F28  | C14  | F29  | 108.6(6)  | F31C | C15C | C13C | 108.8(11) |
| F28  | C14  | F30  | 110.6(5)  | F32C | C15C | C13C | 113.1(11) |
| F29  | C14  | C13  | 109.0(5)  | F32C | C15C | F31C | 103.6(11) |
| F29  | C14  | F30  | 105.8(6)  | F33C | C15C | C13C | 109.1(10) |
| F30  | C14  | C13  | 110.2(5)  | F33C | C15C | F31C | 109.8(12) |
| F31  | C15  | C13  | 108.0(5)  | F33C | C15C | F32C | 112.3(12) |
| F32  | C15  | C13  | 111.1(5)  | F34C | C16C | C13C | 109.4(9)  |
| F32  | C15  | F31  | 109.6(6)  | F34C | C16C | F35C | 103.3(10) |
| F33  | C15  | C13  | 114.2(5)  | F34C | C16C | F36C | 112.0(11) |
| F33  | C15  | F31  | 107.7(6)  | F35C | C16C | C13C | 111.2(10) |
| F33  | C15  | F32  | 106.1(5)  | F35C | C16C | F36C | 112.1(10) |
| F34  | C16  | C13  | 108.9(5)  | F36C | C16C | C13C | 108.8(9)  |
| F35  | C16  | C13  | 112.1(5)  | O118 | C101 | C102 | 111.1(4)  |
| F35  | C16  | F34  | 108.8(5)  | O103 | C102 | C101 | 111.5(4)  |
| F35  | C16  | F36  | 105.5(6)  | C104 | O103 | C102 | 115.3(4)  |
| F36  | C16  | C13  | 112.7(6)  | O103 | C104 | C105 | 111.9(5)  |
| F36  | C16  | F34  | 108.7(6)  | O106 | C105 | C104 | 111.1(5)  |
| C13B | O4B  | Al1  | 145.4(11) | C107 | O106 | C105 | 115.0(4)  |
| O4B  | C13B | C14B | 106.7(10) | O106 | C107 | C108 | 110.5(5)  |
| O4B  | C13B | C15B | 108.8(10) | O109 | C108 | C107 | 111.9(4)  |

|      |      |      |           |      |      |      |           |
|------|------|------|-----------|------|------|------|-----------|
| O4B  | C13B | C16B | 113.6(11) | C110 | O109 | C108 | 115.3(4)  |
| C14B | C13B | C15B | 110.2(9)  | O109 | C110 | C111 | 111.8(4)  |
| C16B | C13B | C14B | 108.7(9)  | O112 | C111 | C110 | 112.2(4)  |
| C16B | C13B | C15B | 108.7(9)  | C113 | O112 | C111 | 115.3(4)  |
| F28B | C14B | C13B | 106.8(9)  | O112 | C113 | C114 | 111.9(4)  |
| F29B | C14B | C13B | 112.1(12) | O115 | C114 | C113 | 112.5(4)  |
| F29B | C14B | F28B | 115.8(12) | C114 | O115 | C116 | 115.0(4)  |
| F30B | C14B | C13B | 109.3(9)  | O115 | C116 | C117 | 111.5(4)  |
| F30B | C14B | F28B | 112.2(10) | O118 | C117 | C116 | 110.9(4)  |
| F30B | C14B | F29B | 100.5(11) | C117 | O118 | C101 | 113.9(4)  |
| F31B | C15B | C13B | 108.6(9)  | O218 | C201 | C202 | 108.6(5)  |
| F32B | C15B | C13B | 111.5(12) | O203 | C202 | C201 | 108.3(5)  |
| F32B | C15B | F31B | 103.3(11) | C202 | O203 | C204 | 113.0(5)  |
| F32B | C15B | F33B | 110.0(11) | O203 | C204 | C205 | 109.6(5)  |
| F33B | C15B | C13B | 109.2(9)  | O206 | C205 | C204 | 107.7(5)  |
| F33B | C15B | F31B | 114.2(11) | C207 | O206 | C205 | 113.0(5)  |
| F34B | C16B | C13B | 107.5(9)  | O206 | C207 | C208 | 109.6(6)  |
| F35B | C16B | C13B | 110.5(10) | O209 | C208 | C207 | 108.7(5)  |
| F35B | C16B | F34B | 116.5(11) | C210 | O209 | C208 | 113.2(5)  |
| F35B | C16B | F36B | 106.8(12) | O209 | C210 | C211 | 110.3(5)  |
| F36B | C16B | C13B | 112.9(12) | O212 | C211 | C210 | 107.6(5)  |
| F36B | C16B | F34B | 102.6(12) | C211 | O212 | C213 | 111.1(5)  |
| O1A  | Al1A | O3C  | 113.5(5)  | O212 | C213 | C214 | 109.3(5)  |
| O1A  | Al1A | O4C  | 103.4(6)  | O215 | C214 | C213 | 108.8(5)  |
| O1C  | Al1A | O1A  | 3.6(7)    | C214 | O215 | C216 | 112.5(5)  |
| O1C  | Al1A | O2A  | 106.0(7)  | O215 | C216 | C217 | 109.3(5)  |
| O1C  | Al1A | O3A  | 109.8(8)  | O218 | C217 | C216 | 108.6(5)  |
| O1C  | Al1A | O3C  | 111.8(5)  | C217 | O218 | C201 | 111.9(5)  |
| O1C  | Al1A | O4C  | 107.0(6)  | O418 | C401 | C402 | 109.7(19) |
| O2A  | Al1A | O1A  | 108.0(4)  | O403 | C402 | C401 | 106.6(17) |
| O2A  | Al1A | O3A  | 105.6(5)  | C404 | O403 | C402 | 110.8(16) |
| O2A  | Al1A | O3C  | 107.3(6)  | O403 | C404 | C405 | 110(2)    |
| O2A  | Al1A | O4C  | 119.6(8)  | O406 | C405 | C404 | 107.9(19) |
| O2C  | Al1A | O1A  | 111.4(7)  | C407 | O406 | C405 | 112.3(16) |
| O2C  | Al1A | O1C  | 109.7(6)  | O406 | C407 | C408 | 110.4(18) |
| O2C  | Al1A | O2A  | 5.7(9)    | O409 | C408 | C407 | 106.7(17) |
| O2C  | Al1A | O3A  | 107.7(8)  | C410 | O409 | C408 | 113.6(16) |
| O2C  | Al1A | O3C  | 109.1(5)  | O409 | C410 | C411 | 113.2(19) |
| O2C  | Al1A | O4A  | 110.5(7)  | O412 | C411 | C410 | 108.8(18) |
| O2C  | Al1A | O4C  | 114.0(6)  | C413 | O412 | C411 | 113.5(16) |
| O3A  | Al1A | O1A  | 111.8(5)  | O412 | C413 | C414 | 111.4(19) |
| O3A  | Al1A | O3C  | 3.3(8)    | O415 | C414 | C413 | 108.9(18) |

|     |      |      |           |      |      |      |           |
|-----|------|------|-----------|------|------|------|-----------|
| O3A | Al1A | O4C  | 108.6(8)  | C416 | O415 | C414 | 113.3(16) |
| O3C | Al1A | O4C  | 105.3(5)  | O415 | C416 | C417 | 111.4(19) |
| O4A | Al1A | O1A  | 107.7(4)  | O418 | C417 | C416 | 108.8(17) |
| O4A | Al1A | O1C  | 111.3(6)  | C417 | O418 | C401 | 113.6(15) |
| O4A | Al1A | O2A  | 116.1(5)  | F501 | C501 | C502 | 118.2(4)  |
| O4A | Al1A | O3A  | 107.7(5)  | F501 | C501 | C506 | 121.8(4)  |
| O4A | Al1A | O3C  | 104.4(5)  | C502 | C501 | C506 | 120.0     |
| O4A | Al1A | O4C  | 4.5(8)    | C501 | C502 | C503 | 120.0     |
| C1A | O1A  | Al1A | 149.9(7)  | C504 | C503 | C502 | 120.0     |
| O1A | C1A  | C2A  | 110.3(7)  | C503 | C504 | C505 | 120.0     |
| O1A | C1A  | C3A  | 108.8(6)  | C506 | C505 | C504 | 120.0     |
| O1A | C1A  | C4A  | 110.6(7)  | C505 | C506 | C501 | 120.0     |
| C2A | C1A  | C3A  | 108.1(6)  | F511 | C511 | C512 | 130.9(11) |
| C4A | C1A  | C2A  | 109.0(6)  | F511 | C511 | C516 | 109.0(11) |
| C4A | C1A  | C3A  | 110.0(6)  | C512 | C511 | C516 | 120.0     |
| F1A | C2A  | C1A  | 111.0(6)  | C511 | C512 | C513 | 120.0     |
| F1A | C2A  | F2A  | 106.8(7)  | C514 | C513 | C512 | 120.0     |
| F2A | C2A  | C1A  | 110.0(7)  | C513 | C514 | C515 | 120.0     |
| F3A | C2A  | C1A  | 114.4(7)  | C516 | C515 | C514 | 120.0     |
| F3A | C2A  | F1A  | 107.6(7)  | C515 | C516 | C511 | 120.0     |
| F3A | C2A  | F2A  | 106.7(7)  | F601 | C601 | C602 | 115.3(5)  |
| F4A | C3A  | C1A  | 110.4(7)  | F601 | C601 | C606 | 124.7(5)  |
| F5A | C3A  | C1A  | 113.7(7)  | C602 | C601 | C606 | 120.0     |
| F5A | C3A  | F4A  | 109.1(7)  | C603 | C602 | C601 | 120.0     |
| F6A | C3A  | C1A  | 109.3(6)  | C602 | C603 | C604 | 120.0     |
| F6A | C3A  | F4A  | 107.4(7)  | C605 | C604 | C603 | 120.0     |
| F6A | C3A  | F5A  | 106.8(7)  | C604 | C605 | C606 | 120.0     |
| F7A | C4A  | C1A  | 113.6(7)  | C605 | C606 | C601 | 120.0     |
| F7A | C4A  | F8A  | 108.6(7)  | F611 | C611 | C612 | 127.7(8)  |
| F8A | C4A  | C1A  | 111.0(7)  | F611 | C611 | C616 | 112.2(8)  |
| F9A | C4A  | C1A  | 111.1(7)  | C612 | C611 | C616 | 120.0     |
| F9A | C4A  | F7A  | 108.3(7)  | C611 | C612 | C613 | 120.0     |
| F9A | C4A  | F8A  | 103.8(7)  | C614 | C613 | C612 | 120.0     |
| C1C | O1C  | Al1A | 149.7(10) | C613 | C614 | C615 | 120.0     |
| O1C | C1C  | C2C  | 109.1(10) | C616 | C615 | C614 | 120.0     |
| O1C | C1C  | C3C  | 107.0(9)  | C615 | C616 | C611 | 120.0     |
| O1C | C1C  | C4C  | 111.9(10) | F701 | C701 | C702 | 125.4(4)  |
| C3C | C1C  | C2C  | 109.3(8)  | F701 | C701 | C706 | 114.5(4)  |
| C4C | C1C  | C2C  | 108.8(8)  | C702 | C701 | C706 | 120.0     |
| C4C | C1C  | C3C  | 110.8(9)  | C701 | C702 | C703 | 120.0     |
| F1C | C2C  | C1C  | 111.5(9)  | C702 | C703 | C704 | 120.0     |
| F2C | C2C  | C1C  | 113.7(10) | C705 | C704 | C703 | 120.0     |

|      |     |      |           |      |      |                   |           |
|------|-----|------|-----------|------|------|-------------------|-----------|
| F2C  | C2C | F1C  | 106.6(10) | C704 | C705 | C706              | 120.0     |
| F2C  | C2C | F3C  | 105.0(10) | C705 | C706 | C701              | 120.0     |
| F3C  | C2C | C1C  | 110.0(9)  | F711 | C711 | C712              | 94.8(17)  |
| F3C  | C2C | F1C  | 109.7(10) | F711 | C711 | C716              | 145.1(17) |
| F4C  | C3C | C1C  | 111.7(9)  | C712 | C711 | C716              | 120.0     |
| F5C  | C3C | C1C  | 112.5(9)  | C711 | C712 | C713              | 120.0     |
| F5C  | C3C | F4C  | 106.1(9)  | C714 | C713 | C712              | 120.0     |
| F6C  | C3C | C1C  | 111.6(9)  | C713 | C714 | C715              | 120.0     |
| F6C  | C3C | F4C  | 107.1(9)  | C714 | C715 | C716              | 120.0     |
| F6C  | C3C | F5C  | 107.6(10) | C715 | C716 | C711              | 120.0     |
| F7C  | C4C | C1C  | 112.6(10) | F801 | C801 | C802              | 117.9(5)  |
| F7C  | C4C | F9C  | 112.5(11) | F801 | C801 | C806              | 122.0(5)  |
| F8C  | C4C | C1C  | 112.3(10) | C802 | C801 | C806              | 120.0     |
| F8C  | C4C | F7C  | 101.4(10) | C801 | C802 | C803              | 120.0     |
| F8C  | C4C | F9C  | 108.3(11) | C804 | C803 | C802              | 120.0     |
| F9C  | C4C | C1C  | 109.4(10) | C805 | C804 | C803              | 120.0     |
| C5A  | O2A | A11A | 144.1(8)  | C806 | C805 | C804              | 120.0     |
| O2A  | C5A | C6A  | 111.6(8)  | C805 | C806 | C801              | 120.0     |
| O2A  | C5A | C7A  | 110.9(8)  | F811 | C811 | C812              | 124.5(8)  |
| O2A  | C5A | C8A  | 105.8(7)  | F811 | C811 | C816              | 115.5(8)  |
| C7A  | C5A | C6A  | 109.0(7)  | C812 | C811 | C816              | 120.0     |
| C8A  | C5A | C6A  | 109.7(7)  | C811 | C812 | C813              | 120.0     |
| C8A  | C5A | C7A  | 109.7(7)  | C812 | C813 | C814              | 120.0     |
| F10A | C6A | C5A  | 110.8(8)  | C815 | C814 | C813              | 120.0     |
| F10A | C6A | F11A | 106.9(8)  | C814 | C815 | C816              | 120.0     |
| F11A | C6A | C5A  | 109.3(8)  | C815 | C816 | C811              | 120.0     |
| F12A | C6A | C5A  | 112.0(8)  | F901 | C901 | C902              | 116.4(8)  |
| F12A | C6A | F10A | 111.2(8)  | F901 | C901 | C903 <sup>1</sup> | 121.2(8)  |
| F12A | C6A | F11A | 106.4(7)  | C902 | C901 | C903 <sup>1</sup> | 122.4(7)  |
| F13A | C7A | C5A  | 111.8(8)  | C903 | C902 | C901              | 111.0(6)  |
| F14A | C7A | C5A  | 109.9(7)  | C902 | C903 | C901 <sup>1</sup> | 126.7(7)  |

#### 2.1.6. Hydrogen Atom Coordinates and Isotropic Displacement Parameters

| Atom | x    | y    | z    | U(eq) |
|------|------|------|------|-------|
| H10A | 5646 | 7063 | 5753 | 48    |
| H10B | 5774 | 6065 | 5746 | 48    |
| H10C | 6862 | 6243 | 6040 | 50    |
| H10D | 6765 | 6790 | 5660 | 50    |
| H10E | 7626 | 7745 | 5885 | 56    |
| H10F | 7771 | 7231 | 6273 | 56    |
| H10G | 8127 | 8598 | 6359 | 64    |
| H10H | 7384 | 8937 | 6210 | 64    |

|      |      |       |      |    |
|------|------|-------|------|----|
| H10I | 7397 | 9630  | 6850 | 62 |
| H10J | 8128 | 9211  | 6960 | 62 |
| H10K | 7723 | 8483  | 7447 | 59 |
| H10L | 7591 | 9473  | 7494 | 59 |
| H11A | 6663 | 9234  | 7854 | 57 |
| H11B | 6792 | 8238  | 7833 | 57 |
| H11C | 5690 | 8473  | 7945 | 55 |
| H11D | 5570 | 9077  | 7583 | 55 |
| H11E | 4646 | 8131  | 7333 | 50 |
| H11F | 4806 | 7580  | 7710 | 50 |
| H11G | 5014 | 6407  | 7357 | 48 |
| H11H | 4271 | 6767  | 7225 | 48 |
| H11I | 4277 | 6122  | 6624 | 39 |
| H11J | 5014 | 5738  | 6753 | 39 |
| H11K | 4847 | 5835  | 6097 | 50 |
| H11L | 4701 | 6827  | 6125 | 50 |
| H20A | 3501 | 4954  | 9593 | 51 |
| H20B | 3221 | 5683  | 9850 | 51 |
| H20C | 4389 | 5907  | 9759 | 49 |
| H20D | 4176 | 5982  | 9311 | 49 |
| H20E | 4620 | 7418  | 9355 | 50 |
| H20F | 4784 | 7321  | 9804 | 50 |
| H20G | 3980 | 8419  | 9881 | 52 |
| H20H | 4620 | 8740  | 9677 | 52 |
| H20I | 4043 | 9805  | 9316 | 53 |
| H20J | 3390 | 9635  | 9537 | 53 |
| H20K | 3086 | 10281 | 8947 | 54 |
| H20L | 3388 | 9484  | 8741 | 54 |
| H21A | 2242 | 9250  | 8430 | 55 |
| H21B | 1960 | 10023 | 8660 | 55 |
| H21C | 1245 | 9068  | 8947 | 53 |
| H21D | 1069 | 9099  | 8496 | 53 |
| H21E | 616  | 7727  | 8515 | 58 |
| H21F | 813  | 7669  | 8963 | 58 |
| H21G | 741  | 6308  | 8678 | 56 |
| H21H | 1350 | 6563  | 8434 | 56 |
| H21I | 1997 | 5394  | 8755 | 53 |
| H21J | 1363 | 5217  | 8991 | 53 |
| H21K | 2068 | 5528  | 9561 | 49 |
| H21L | 2349 | 4731  | 9346 | 49 |
| H40A | 4351 | 6576  | 9301 | 51 |
| H40B | 4476 | 6195  | 9721 | 51 |

|      |      |       |      |    |
|------|------|-------|------|----|
| H40C | 4083 | 7508  | 9955 | 49 |
| H40D | 4778 | 7602  | 9760 | 49 |
| H40E | 4470 | 9011  | 9654 | 50 |
| H40F | 3720 | 8927  | 9784 | 50 |
| H40G | 3793 | 10027 | 9344 | 52 |
| H40H | 3980 | 9344  | 9037 | 52 |
| H40I | 2929 | 9626  | 8636 | 53 |
| H40J | 2819 | 10364 | 8932 | 53 |
| H40K | 1783 | 9715  | 9054 | 54 |
| H40L | 1773 | 10014 | 8621 | 54 |
| H41A | 963  | 8878  | 8436 | 55 |
| H41B | 990  | 8615  | 8872 | 55 |
| H41C | 616  | 7507  | 8478 | 53 |
| H41D | 1319 | 7527  | 8290 | 53 |
| H41E | 1455 | 6066  | 8530 | 58 |
| H41F | 774  | 6168  | 8733 | 58 |
| H41G | 1408 | 5949  | 9325 | 56 |
| H41H | 1449 | 5150  | 9050 | 56 |
| H41I | 2546 | 4743  | 9353 | 53 |
| H41J | 2454 | 5490  | 9647 | 53 |
| H41K | 3612 | 5135  | 9637 | 49 |
| H41L | 3563 | 5381  | 9197 | 49 |
| H50A | 6717 | 1247  | 7947 | 41 |
| H50B | 7787 | 982   | 8272 | 45 |
| H50C | 8753 | 963   | 7944 | 43 |
| H50D | 8649 | 1208  | 7291 | 41 |
| H50E | 7578 | 1473  | 6966 | 39 |
| H51A | 7376 | 1575  | 6976 | 41 |
| H51B | 6557 | 1735  | 7401 | 45 |
| H51C | 6847 | 1488  | 8047 | 43 |
| H51D | 7955 | 1080  | 8268 | 41 |
| H51E | 8774 | 920   | 7843 | 39 |
| H60A | 4366 | 8626  | 6308 | 38 |
| H60B | 4660 | 9499  | 6831 | 41 |
| H60C | 5674 | 10270 | 6874 | 43 |
| H60D | 6395 | 10168 | 6394 | 37 |
| H60E | 6102 | 9295  | 5871 | 35 |
| H61A | 4835 | 8437  | 5909 | 38 |
| H61B | 4322 | 8671  | 6465 | 41 |
| H61C | 4800 | 9637  | 6914 | 43 |
| H61D | 5790 | 10370 | 6809 | 37 |
| H61E | 6303 | 10136 | 6254 | 35 |



|      |      |      |       |    |
|------|------|------|-------|----|
| H70A | 3335 | 8525 | 8124  | 37 |
| H70B | 2445 | 7564 | 7985  | 38 |
| H70C | 2579 | 6154 | 8174  | 42 |
| H70D | 3603 | 5704 | 8503  | 43 |
| H70E | 4493 | 6665 | 8642  | 43 |
| H71A | 4493 | 7775 | 8528  | 37 |
| H71B | 3588 | 8509 | 8201  | 38 |
| H71C | 2570 | 7806 | 8006  | 42 |
| H71D | 2458 | 6369 | 8139  | 43 |
| H71E | 3364 | 5635 | 8467  | 43 |
| H80A | 7176 | 2674 | 9955  | 59 |
| H80B | 7517 | 1386 | 10236 | 56 |
| H80C | 8674 | 1051 | 10343 | 65 |
| H80D | 9489 | 2004 | 10169 | 66 |
| H80E | 9148 | 3292 | 9887  | 61 |
| H81A | 9461 | 2637 | 10106 | 59 |
| H81B | 8675 | 3649 | 9858  | 56 |
| H81C | 7509 | 3364 | 9824  | 65 |
| H81D | 7129 | 2068 | 10038 | 66 |
| H81E | 7916 | 1056 | 10285 | 61 |
| H901 | 9706 | 4385 | 10522 | 75 |
| H902 | 8930 | 5343 | 10207 | 74 |
| H903 | 9286 | 5908 | 9695  | 79 |

## 2.2.[In([18]crown-6)(PhF)<sub>2</sub>]<sub>4</sub>[Al(OC(CF<sub>3</sub>)<sub>3</sub>)<sub>4</sub>]<sub>4</sub>•PhF (2)

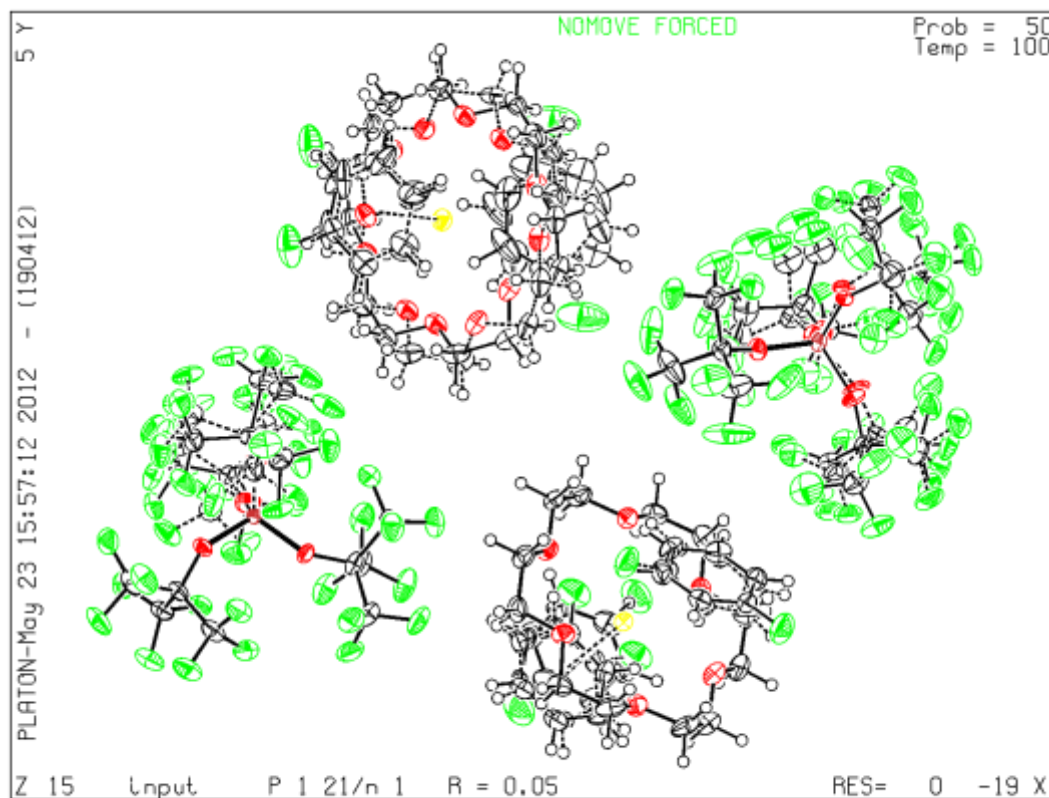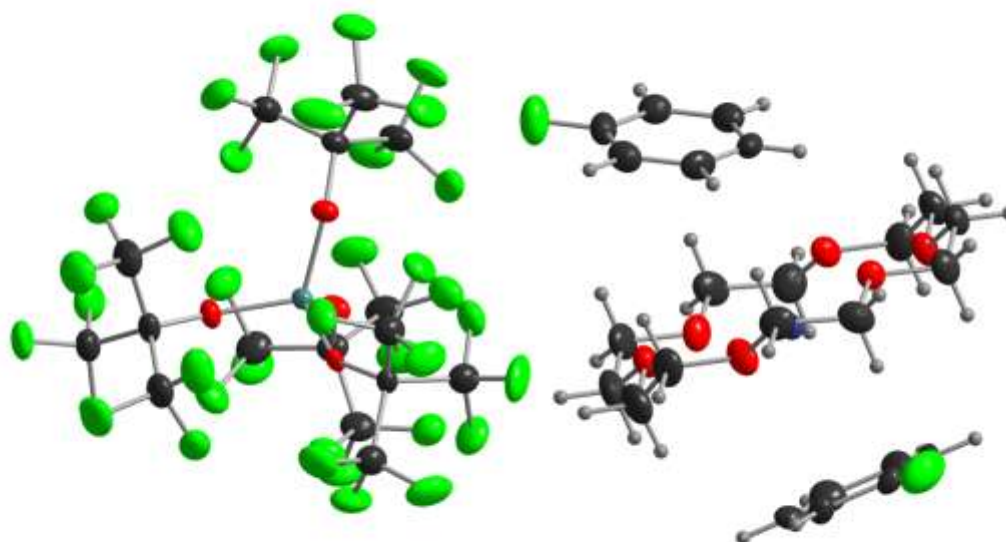

### 2.2.1. Crystal data and structure refinement of CCDC 861241

|                                             |                                                                                                    |
|---------------------------------------------|----------------------------------------------------------------------------------------------------|
| Identification code                         | CCDC 861241                                                                                        |
| Empirical formula                           | C <sub>166</sub> H <sub>141</sub> Al <sub>4</sub> F <sub>153</sub> In <sub>4</sub> O <sub>40</sub> |
| Formula weight                              | 6249.82                                                                                            |
| Temperature/K                               | 100.0                                                                                              |
| Crystal system                              | monoclinic                                                                                         |
| Space group                                 | P2 <sub>1</sub> /n                                                                                 |
| a/Å                                         | 19.7449(3)                                                                                         |
| b/Å                                         | 15.9218(2)                                                                                         |
| c/Å                                         | 35.6744(6)                                                                                         |
| α/°                                         | 90.00                                                                                              |
| β/°                                         | 95.9320(10)                                                                                        |
| γ/°                                         | 90.00                                                                                              |
| Volume/Å <sup>3</sup>                       | 11155.1(3)                                                                                         |
| Z                                           | 2                                                                                                  |
| ρ <sub>calc</sub> /mg/mm <sup>3</sup>       | 1.711                                                                                              |
| m/mm <sup>-1</sup>                          | 0.607                                                                                              |
| F(000)                                      | 5648.0                                                                                             |
| Crystal size/mm <sup>3</sup>                | 0.2 × 0.2 × 0.1                                                                                    |
| 2θ range for data collection                | 3.3 to 54.96°                                                                                      |
| Index ranges                                | -25 ≤ h ≤ 8, -20 ≤ k ≤ 20, -44 ≤ l ≤ 45                                                            |
| Reflections collected                       | 75318                                                                                              |
| Independent reflections                     | 24937[R(int) = 0.0306]                                                                             |
| Data/restraints/parameters                  | 24937/3408/2111                                                                                    |
| Goodness-of-fit on F <sup>2</sup>           | 1.032                                                                                              |
| Final R indexes [I ≥ 2σ(I)]                 | R <sub>1</sub> = 0.0539, wR <sub>2</sub> = 0.1364                                                  |
| Final R indexes [all data]                  | R <sub>1</sub> = 0.0761, wR <sub>2</sub> = 0.1519                                                  |
| Largest diff. peak/hole / e Å <sup>-3</sup> | 0.82/-0.60                                                                                         |

### 2.2.2. Fractional Atomic Coordinates and Equivalent Isotropic Displacement Parameters

| Atom | x           | y           | z          | U(eq)    |
|------|-------------|-------------|------------|----------|
| In1  | 6116.90(13) | 2119.26(17) | 1763.29(8) | 25.09(7) |
| In2  | 2180.99(14) | 7548.40(18) | 945.43(8)  | 30.37(8) |
| Al1  | 914.1(5)    | 2273.7(6)   | 1807.1(3)  | 17.0(2)  |
| Al1A | 7444.5(5)   | 6950.4(7)   | 650.0(3)   | 22.3(2)  |
| O1   | 824(8)      | 3346(7)     | 1900(3)    | 22.8(11) |
| C1   | 733(3)      | 3911(5)     | 2172.5(19) | 25.3(8)  |
| C2   | 1326(3)     | 3911(4)     | 2488.0(16) | 36.3(12) |
| C3   | 64(3)       | 3736(4)     | 2359.5(17) | 36.8(13) |
| C4   | 666(3)      | 4785(4)     | 1982.5(18) | 38.6(16) |
| F1   | 1880.5(18)  | 4264(3)     | 2366.6(12) | 55.1(11) |
| F2   | 1481(2)     | 3114(2)     | 2593.4(12) | 44.9(10) |
| F3   | 1183(4)     | 4322(5)     | 2792.0(17) | 45.9(12) |
| F4   | 154(2)      | 3166(2)     | 2624.4(11) | 49.5(10) |

|      |          |          |            |          |
|------|----------|----------|------------|----------|
| F5   | -427(3)  | 3462(4)  | 2097.2(14) | 54.5(14) |
| F6   | -177(4)  | 4423(5)  | 2517(2)    | 54.4(13) |
| F7   | 86(2)    | 4892(2)  | 1782.7(12) | 54.4(11) |
| F8   | 1145(3)  | 4867(2)  | 1749.0(12) | 56.9(11) |
| F9   | 744(7)   | 5415(8)  | 2233(4)    | 43.4(7)  |
| O1B  | 780(20)  | 3290(20) | 1912(9)    | 22.8(11) |
| C1B  | 680(6)   | 3904(11) | 2164(4)    | 25.3(8)  |
| C2B  | -97(6)   | 4011(8)  | 2197(4)    | 36.3(12) |
| C3B  | 1023(6)  | 3664(8)  | 2559(3)    | 36.8(13) |
| C4B  | 964(7)   | 4745(10) | 2032(4)    | 38.6(16) |
| F1B  | -392(9)  | 3281(9)  | 2211(5)    | 55.1(11) |
| F2B  | -369(5)  | 4470(6)  | 1908(2)    | 44.9(10) |
| F3B  | -191(11) | 4429(13) | 2513(4)    | 45.9(12) |
| F4B  | 1640(6)  | 3333(8)  | 2518(4)    | 49.5(10) |
| F5B  | 654(5)   | 3086(6)  | 2724(3)    | 54.5(14) |
| F6B  | 1148(10) | 4309(11) | 2792(6)    | 54.4(13) |
| F7B  | 745(7)   | 4879(7)  | 1668(3)    | 54.4(11) |
| F8B  | 1657(6)  | 4737(6)  | 2105(3)    | 56.9(11) |
| F9B  | 760(18)  | 5399(19) | 2225(10)   | 43.4(7)  |
| O2   | 692(9)   | 2095(13) | 1329(4)    | 17(2)    |
| C5   | 291(4)   | 2263(5)  | 1011(3)    | 21.2(12) |
| C6   | 425(3)   | 1581(5)  | 716.0(19)  | 35.2(8)  |
| C7   | -481(3)  | 2235(5)  | 1075(2)    | 35.2(8)  |
| C8   | 439(4)   | 3151(5)  | 860(2)     | 35.2(8)  |
| F10  | 1005(2)  | 1737(3)  | 568.8(14)  | 48.2(13) |
| F11  | -71(5)   | 1564(10) | 431(3)     | 53(3)    |
| F12  | 471(8)   | 829(8)   | 870(6)     | 53(4)    |
| F13  | -688(3)  | 1432(4)  | 1098.3(17) | 49.0(14) |
| F14  | -582(4)  | 2621(4)  | 1398(2)    | 44.0(17) |
| F15  | -882(8)  | 2612(12) | 809(4)     | 61(4)    |
| F16  | 179(2)   | 3747(3)  | 1055.7(13) | 40.9(12) |
| F17  | 1112(3)  | 3278(4)  | 891(2)     | 44.3(17) |
| F18  | 200(7)   | 3263(9)  | 500(3)     | 46(3)    |
| O2B  | 595(12)  | 2111(18) | 1355(5)    | 29(6)    |
| C5B  | 169(6)   | 2257(6)  | 1043(4)    | 21.2(12) |
| C6B  | -14(4)   | 1417(5)  | 835(2)     | 35.2(8)  |
| C7B  | -504(5)  | 2658(6)  | 1157(3)    | 35.2(8)  |
| C8B  | 491(5)   | 2875(6)  | 775(3)     | 35.2(8)  |
| F10B | -449(4)  | 976(5)   | 1022(2)    | 49.6(19) |
| F11B | -303(6)  | 1530(13) | 487(3)     | 49(3)    |
| F12B | 535(8)   | 947(10)  | 824(6)     | 52(4)    |
| F13B | -667(5)  | 2259(7)  | 1467(3)    | 51(3)    |

|      |            |            |            |          |
|------|------------|------------|------------|----------|
| F14B | -1003(10)  | 2572(16)   | 879(5)     | 56(5)    |
| F15B | -394(4)    | 3451(4)    | 1252(2)    | 64(2)    |
| F16B | 833(5)     | 3474(6)    | 965(3)     | 61(3)    |
| F17B | 15(8)      | 3223(13)   | 525(5)     | 64(6)    |
| F18B | 909(3)     | 2487(6)    | 564.2(18)  | 61(2)    |
| O3   | 438.5(13)  | 1740.5(16) | 2111.2(7)  | 27.2(6)  |
| C9   | 309.9(18)  | 998(2)     | 2271.3(10) | 28.4(8)  |
| C10  | 48(2)      | 348(2)     | 1963.1(11) | 34.3(9)  |
| C11  | 968(2)     | 654(3)     | 2501.5(12) | 38.2(10) |
| C12  | -247(2)    | 1138(3)    | 2541.4(12) | 38.8(10) |
| F19  | 78.4(15)   | -443.7(15) | 2093.0(7)  | 46.8(7)  |
| F20  | -588.0(13) | 508.9(17)  | 1829.2(7)  | 43.5(6)  |
| F21  | 424.5(13)  | 377.8(15)  | 1677.6(7)  | 37.4(5)  |
| F22  | 833.6(15)  | 76.0(17)   | 2754.4(8)  | 50.9(7)  |
| F23  | 1387.4(13) | 295.0(16)  | 2275.5(8)  | 45.0(6)  |
| F24  | 1309.6(14) | 1269.7(16) | 2687.0(7)  | 44.6(6)  |
| F25  | 13.9(15)   | 1509.9(18) | 2858.6(7)  | 50.3(7)  |
| F26  | -527.2(15) | 407.2(17)  | 2637.9(8)  | 51.6(7)  |
| F27  | -742.2(13) | 1619.8(17) | 2384.7(8)  | 45.5(6)  |
| O4   | 1741.8(12) | 1929.5(16) | 1888.3(7)  | 25.9(5)  |
| C13  | 2368.5(17) | 1888(2)    | 1764.5(10) | 29.5(8)  |
| C14  | 2328(2)    | 1595(3)    | 1350.6(13) | 41.2(10) |
| C15  | 2811.4(19) | 1278(3)    | 2023.1(12) | 36.9(9)  |
| C16  | 2703(2)    | 2785(3)    | 1793.0(14) | 41.8(11) |
| F28  | 2111.3(14) | 2197(2)    | 1112.0(8)  | 52.1(7)  |
| F29  | 1905.4(13) | 943.7(19)  | 1296.2(8)  | 49.3(7)  |
| F30  | 2935.6(13) | 1343(2)    | 1257.3(8)  | 55.7(8)  |
| F31  | 2646.8(14) | 488.5(16)  | 1930.1(9)  | 50.2(7)  |
| F32  | 3477.7(12) | 1372.9(19) | 1989.5(9)  | 51.3(7)  |
| F33  | 2719.7(13) | 1386.0(18) | 2380.4(7)  | 45.8(6)  |
| F34  | 3247.8(14) | 2832(2)    | 1600.7(9)  | 55.6(8)  |
| F35  | 2260.8(13) | 3364.0(17) | 1650.3(9)  | 50.7(7)  |
| F36  | 2893.7(13) | 2980.1(17) | 2146.0(8)  | 47.3(7)  |
| O1A  | 8138(5)    | 6289(6)    | 827(3)     | 24(2)    |
| C1A  | 8401(4)    | 5503(5)    | 795(2)     | 23(2)    |
| C2A  | 7932(3)    | 4882(4)    | 561.6(17)  | 31.7(15) |
| C3A  | 9077(3)    | 5607(4)    | 613(2)     | 39.2(17) |
| C4A  | 8558(4)    | 5138(4)    | 1207(2)    | 43.6(18) |
| F1A  | 7950(3)    | 5001(4)    | 194.2(16)  | 43.3(12) |
| F2A  | 8099(3)    | 4078(3)    | 627.5(17)  | 51.2(11) |
| F3A  | 7302(3)    | 4983(3)    | 617.2(15)  | 42.5(11) |
| F4A  | 9557(3)    | 5953(4)    | 856.8(18)  | 52.2(16) |

|      |            |            |            |           |
|------|------------|------------|------------|-----------|
| F5A  | 9304(4)    | 4866(5)    | 498(2)     | 48.6(19)  |
| F6A  | 8996(4)    | 6091(6)    | 311(2)     | 48.4(19)  |
| F7A  | 8988(3)    | 4495(3)    | 1214.2(13) | 54.7(14)  |
| F8A  | 7977(4)    | 4911(6)    | 1338(2)    | 81(3)     |
| F9A  | 8829(3)    | 5731(4)    | 1432.9(14) | 56.7(15)  |
| O1C  | 8122(10)   | 6407(11)   | 758(6)     | 47(6)     |
| C1C  | 8543(5)    | 5730(7)    | 764(3)     | 22(3)     |
| C2C  | 8153(5)    | 4947(6)    | 886(3)     | 56(4)     |
| C3C  | 8735(5)    | 5588(7)    | 358(3)     | 46(3)     |
| C4C  | 9216(5)    | 5832(6)    | 1033(3)    | 43(3)     |
| F1C  | 7486(4)    | 4974(5)    | 758(2)     | 43.3(12)  |
| F2C  | 8405(4)    | 4225(4)    | 771(3)     | 51.2(11)  |
| F3C  | 8135(5)    | 4860(6)    | 1256(3)    | 42.5(11)  |
| F4C  | 8212(4)    | 5254(7)    | 142(3)     | 61(3)     |
| F5C  | 9290(7)    | 5091(9)    | 341(4)     | 65(4)     |
| F6C  | 8878(7)    | 6301(8)    | 200(4)     | 56(3)     |
| F7C  | 9549(4)    | 5112(5)    | 1100(2)    | 60(2)     |
| F8C  | 9096(5)    | 6160(6)    | 1358(2)    | 60(2)     |
| F9C  | 9631(5)    | 6387(6)    | 893(3)     | 54(3)     |
| O2A  | 6728.7(13) | 6710.2(17) | 866.0(7)   | 29.9(6)   |
| C5A  | 6362.0(18) | 6769(2)    | 1161.7(10) | 28.8(8)   |
| C6A  | 6794(3)    | 6492(3)    | 1526.7(14) | 59.5(16)  |
| C7A  | 5724(3)    | 6183(3)    | 1087.3(16) | 64.7(19)  |
| C8A  | 6121(2)    | 7673(3)    | 1216.1(13) | 37.9(10)  |
| F10A | 6843(3)    | 5651(2)    | 1533.3(11) | 112.4(19) |
| F11A | 7418.4(17) | 6799(3)    | 1536.6(8)  | 75.7(12)  |
| F12A | 6542(2)    | 6726(2)    | 1839.8(8)  | 76.2(11)  |
| F13A | 5906(2)    | 5456(2)    | 946.9(12)  | 90.4(14)  |
| F14A | 5429(2)    | 6033(2)    | 1399.9(11) | 87.7(14)  |
| F15A | 5259.6(16) | 6528(3)    | 841.4(12)  | 87.1(14)  |
| F16A | 5906.7(18) | 8013(2)    | 888.9(9)   | 66.8(9)   |
| F17A | 6631.0(13) | 8157.5(16) | 1368.6(8)  | 45.5(6)   |
| F18A | 5626.9(14) | 7726.5(19) | 1442.2(9)  | 56.4(8)   |
| O3A  | 7195(12)   | 6660(20)   | 194(7)     | 29.1(17)  |
| C9A  | 6739(7)    | 6653(8)    | -117(5)    | 32.5(15)  |
| C10A | 6484(7)    | 7547(8)    | -217(3)    | 54(2)     |
| C11A | 7077(9)    | 6292(13)   | -457(6)    | 44.2(12)  |
| C12A | 6141(6)    | 6075(9)    | -45(4)     | 60(3)     |
| F19A | 5884(6)    | 7525(8)    | -431(3)    | 84.6(18)  |
| F20A | 6362(6)    | 7942(7)    | 95(3)      | 65.6(14)  |
| F21A | 6942(8)    | 7957(7)    | -400(3)    | 63.1(13)  |
| F22A | 6687(15)   | 6440(30)   | -780(7)    | 64(3)     |

|      |          |          |            |          |
|------|----------|----------|------------|----------|
| F23A | 7140(16) | 5459(12) | -422(11)   | 63(2)    |
| F24A | 7665(8)  | 6657(8)  | -479(5)    | 50.3(13) |
| F25A | 5797(6)  | 5804(11) | -351(3)    | 86(2)    |
| F26A | 5729(5)  | 6479(10) | 173(3)     | 74.3(17) |
| F27A | 6387(6)  | 5411(8)  | 153(3)     | 66.4(16) |
| O3C  | 7296(5)  | 6765(9)  | 172(3)     | 29.1(17) |
| C9C  | 6854(3)  | 6877(4)  | -142(2)    | 32.5(15) |
| C10C | 6852(4)  | 7817(5)  | -258.6(19) | 54(2)    |
| C11C | 7118(5)  | 6335(7)  | -458(3)    | 44.2(12) |
| C12C | 6125(3)  | 6616(6)  | -81.1(19)  | 60(3)    |
| F19C | 6383(3)  | 8006(4)  | -528.9(15) | 84.6(18) |
| F20C | 6802(3)  | 8316(3)  | 38.4(13)   | 65.6(14) |
| F21C | 7457(3)  | 7999(3)  | -386.5(13) | 63.1(13) |
| F22C | 6832(6)  | 6562(12) | -802(3)    | 64(3)    |
| F23C | 6963(6)  | 5520(6)  | -407(5)    | 63(2)    |
| F24C | 7785(3)  | 6366(3)  | -455(2)    | 50.3(13) |
| F25C | 5732(3)  | 6521(5)  | -402.0(14) | 86(2)    |
| F26C | 5820(2)  | 7210(4)  | 120.3(14)  | 74.3(17) |
| F27C | 6112(3)  | 5907(4)  | 112.7(15)  | 66.4(16) |
| O4A  | 7697(7)  | 7927(8)  | 792(4)     | 21(2)    |
| C13A | 8198(5)  | 8503(6)  | 838(3)     | 36(3)    |
| C14A | 7887(4)  | 9353(5)  | 943(3)     | 49(3)    |
| C15A | 8570(6)  | 8619(8)  | 479(3)     | 52(5)    |
| C16A | 8733(5)  | 8232(6)  | 1165(3)    | 51(2)    |
| F28A | 8309(3)  | 9996(4)  | 903(3)     | 69(2)    |
| F29A | 7734(8)  | 9338(10) | 1297(4)    | 68(4)    |
| F30A | 7326(4)  | 9514(8)  | 717(4)     | 61(3)    |
| F31A | 8187(3)  | 9063(4)  | 224.2(18)  | 71(2)    |
| F32A | 9184(3)  | 8985(5)  | 554(3)     | 65(2)    |
| F33A | 8682(3)  | 7876(4)  | 322(2)     | 46.2(16) |
| F34A | 9154(2)  | 7657(4)  | 1049.7(19) | 56.5(17) |
| F35A | 8432(4)  | 7892(5)  | 1450(2)    | 53.5(18) |
| F36A | 9120(3)  | 8872(5)  | 1311(2)    | 72(2)    |
| O4C  | 7616(9)  | 8030(10) | 701(5)     | 28(3)    |
| C13C | 8068(5)  | 8672(6)  | 725(3)     | 31(3)    |
| C14C | 7669(5)  | 9459(5)  | 581(2)     | 39(2)    |
| C15C | 8641(6)  | 8483(8)  | 476(4)     | 62(7)    |
| C16C | 8369(5)  | 8823(6)  | 1136(3)    | 51(2)    |
| F28C | 8022(4)  | 10162(4) | 654(2)     | 59(2)    |
| F29C | 7095(5)  | 9514(11) | 739(4)     | 52(3)    |
| F30C | 7520(4)  | 9402(4)  | 210.1(17)  | 68(2)    |
| F31C | 8406(5)  | 8085(6)  | 161(3)     | 66(3)    |

|      |            |            |            |          |
|------|------------|------------|------------|----------|
| F32C | 8951(5)    | 9180(6)    | 372(3)     | 62(3)    |
| F33C | 9112(3)    | 7977(5)    | 651(3)     | 81(3)    |
| F34C | 8919(4)    | 9325(6)    | 1148(3)    | 70(2)    |
| F35C | 8552(6)    | 8109(6)    | 1309(3)    | 70(3)    |
| F36C | 7919(8)    | 9191(12)   | 1335(3)    | 62(4)    |
| C101 | 7648(2)    | 1554(3)    | 1367.4(15) | 50.6(13) |
| O102 | 7470.4(14) | 1624.4(19) | 1742.9(8)  | 37.5(7)  |
| C103 | 7631(2)    | 917(3)     | 1971.3(15) | 49.0(12) |
| C104 | 7459(2)    | 1067(3)    | 2352.0(14) | 48.1(12) |
| O105 | 6750.8(14) | 1203.0(19) | 2356.1(8)  | 37.7(7)  |
| C106 | 6538(2)    | 1328(3)    | 2712.2(13) | 45.6(11) |
| C107 | 5796(2)    | 1463(3)    | 2686.2(14) | 43.2(11) |
| O108 | 5600.9(14) | 2186.2(18) | 2473.3(8)  | 31.2(6)  |
| C109 | 4907(2)    | 2382(3)    | 2448.4(13) | 39.9(10) |
| C110 | 4752(2)    | 3148(3)    | 2231.8(12) | 37.3(10) |
| O111 | 4918.3(14) | 3082.8(18) | 1861.3(8)  | 32.3(6)  |
| C112 | 4772.2(19) | 3795(3)    | 1638.1(11) | 31.1(8)  |
| C113 | 4967(2)    | 3671(3)    | 1251.1(12) | 37.6(10) |
| O114 | 5671.2(13) | 3522.9(17) | 1260.6(7)  | 28.9(6)  |
| C115 | 5898(2)    | 3431(3)    | 900.3(12)  | 37.8(10) |
| C116 | 6638(2)    | 3285(3)    | 931.0(12)  | 39.1(10) |
| O117 | 6819.3(15) | 2543.4(19) | 1132.2(9)  | 39.5(7)  |
| C118 | 7517(2)    | 2340(3)    | 1158.8(14) | 44.8(11) |
| C201 | 1558(3)    | 9426(3)    | 377.0(17)  | 37.2(12) |
| O202 | 2060.8(18) | 9226(2)    | 674(1)     | 31.8(7)  |
| C203 | 2688(3)    | 9645(3)    | 648.5(16)  | 37.1(12) |
| C204 | 3166(3)    | 9458(3)    | 985.7(17)  | 40.4(13) |
| O205 | 3341.6(17) | 8587(2)    | 983.5(10)  | 35.3(8)  |
| C206 | 3803(3)    | 8350(4)    | 1292.6(17) | 41.0(13) |
| C207 | 3990(3)    | 7460(4)    | 1257(2)    | 45.1(14) |
| O208 | 3406.9(17) | 6951(2)    | 1295.9(11) | 36.9(8)  |
| C209 | 3549(3)    | 6074(4)    | 1275.7(17) | 41.7(13) |
| C210 | 2914(3)    | 5596(4)    | 1309.9(16) | 41.2(14) |
| O211 | 2439.1(18) | 5765(2)    | 992.2(10)  | 33.9(8)  |
| C212 | 1812(3)    | 5336(4)    | 1006.4(16) | 41.0(13) |
| C213 | 1353(4)    | 5519(5)    | 659(4)     | 43.8(18) |
| O214 | 1196.2(17) | 6379(2)    | 645.1(10)  | 33.6(8)  |
| C215 | 758(3)     | 6618(4)    | 320.4(16)  | 39.0(12) |
| C216 | 532(3)     | 7494(4)    | 370.3(17)  | 36.9(13) |
| O217 | 1101.6(17) | 8046(2)    | 356(1)     | 33.9(8)  |
| C218 | 943(3)     | 8900(4)    | 409.7(15)  | 38.3(12) |
| C401 | 2353(9)    | 9636(14)   | 582(6)     | 37.2(12) |



|      |            |          |            |          |
|------|------------|----------|------------|----------|
| O402 | 2687(6)    | 9146(9)  | 872(4)     | 31.8(7)  |
| C403 | 3403(8)    | 9217(13) | 917(6)     | 37.1(12) |
| C404 | 3715(12)   | 8712(10) | 1226(7)    | 40.4(13) |
| O405 | 3597(7)    | 7838(8)  | 1162(4)    | 35.3(8)  |
| C406 | 3858(11)   | 7331(11) | 1466(6)    | 41.0(13) |
| C407 | 3784(9)    | 6441(12) | 1354(8)    | 45.1(14) |
| O408 | 3081(7)    | 6225(10) | 1311(4)    | 36.9(8)  |
| C409 | 2962(10)   | 5383(12) | 1194(8)    | 41.7(13) |
| C410 | 2226(9)    | 5235(13) | 1114(6)    | 41.2(14) |
| O411 | 1953(7)    | 5723(9)  | 806(4)     | 33.9(8)  |
| C412 | 1279(15)   | 5510(20) | 677(15)    | 41.0(13) |
| C413 | 1009(11)   | 6127(10) | 393(6)     | 43.8(18) |
| O414 | 1012(7)    | 6950(8)  | 528(4)     | 33.6(8)  |
| C415 | 707(12)    | 7541(11) | 263(6)     | 39.0(12) |
| C416 | 790(8)     | 8405(12) | 410(7)     | 36.9(13) |
| O417 | 1488(6)    | 8632(8)  | 435(4)     | 33.9(8)  |
| C418 | 1618(9)    | 9470(11) | 551(7)     | 38.3(12) |
| F901 | 5018(2)    | 1579(3)  | 733.1(12)  | 65.1(12) |
| C901 | 5188(2)    | 1076(4)  | 1015.2(14) | 29.8(14) |
| C902 | 4738(3)    | 1013(5)  | 1289.1(18) | 33.9(16) |
| C903 | 4886(4)    | 482(7)   | 1596(2)    | 37.9(18) |
| C904 | 5484(5)    | 15(7)    | 1629(2)    | 39.8(17) |
| C905 | 5934(4)    | 78(5)    | 1355(2)    | 35.5(17) |
| C906 | 5786(2)    | 608(4)   | 1048.3(15) | 30.6(14) |
| F971 | 6032(7)    | 797(8)   | 750(4)     | 65.1(12) |
| C971 | 5598(8)    | 721(14)  | 1013(5)    | 29.8(14) |
| C972 | 4997(9)    | 1140(13) | 1065(6)    | 33.9(16) |
| C973 | 4672(11)   | 989(19)  | 1386(7)    | 37.9(18) |
| C974 | 4949(16)   | 420(20)  | 1655(7)    | 39.8(17) |
| C975 | 5549(16)   | 0(20)    | 1603(7)    | 35.5(17) |
| C976 | 5874(11)   | 151(17)  | 1282(7)    | 30.6(14) |
| F911 | 8573.0(18) | 3503(3)  | 2750.5(12) | 60.8(11) |
| C911 | 7966(3)    | 3647(2)  | 2575.2(17) | 35.0(14) |
| C912 | 7878(3)    | 3795(3)  | 2189.2(17) | 39.1(15) |
| C913 | 7230(4)    | 3946(4)  | 2010.3(15) | 38.9(15) |
| C914 | 6671(3)    | 3948(4)  | 2217.3(19) | 41.1(15) |
| C915 | 6760(3)    | 3800(4)  | 2603.2(19) | 41.2(15) |
| C916 | 7407(3)    | 3649(3)  | 2782.1(15) | 35.1(14) |
| F961 | 6330(6)    | 3971(9)  | 2802(4)    | 60.8(11) |
| C961 | 6828(9)    | 3846(8)  | 2589(5)    | 35.0(14) |
| C962 | 7457(10)   | 3560(11) | 2749(5)    | 39.1(15) |
| C963 | 7981(10)   | 3428(13) | 2524(7)    | 38.9(15) |

|      |          |          |            |          |
|------|----------|----------|------------|----------|
| C964 | 7876(12) | 3583(13) | 2139(6)    | 41.1(15) |
| C965 | 7247(13) | 3869(16) | 1979(5)    | 41.2(15) |
| C966 | 6723(11) | 4001(13) | 2204(5)    | 35.1(14) |
| F921 | 446(2)   | 6853(4)  | 1527.6(12) | 79.3(15) |
| C921 | 922(3)   | 7363(4)  | 1599(2)    | 57(2)    |
| C922 | 865(3)   | 8203(4)  | 1495(2)    | 53(2)    |
| C923 | 1402(4)  | 8752(3)  | 1591(3)    | 55.6(19) |
| C924 | 1996(4)  | 8461(4)  | 1793(2)    | 44.8(17) |
| C925 | 2053(4)  | 7620(4)  | 1897.2(19) | 35.6(15) |
| C926 | 1516(4)  | 7071(4)  | 1800(2)    | 33.2(14) |
| F981 | 333(7)   | 8488(12) | 1294(4)    | 79.3(15) |
| C981 | 941(11)  | 8232(12) | 1503(8)    | 57(2)    |
| C982 | 1444(12) | 8820(13) | 1609(9)    | 53(2)    |
| C983 | 2027(13) | 8582(17) | 1836(9)    | 55.6(19) |
| C984 | 2107(16) | 7755(18) | 1957(8)    | 44.8(17) |
| C985 | 1603(17) | 7166(14) | 1851(8)    | 35.6(15) |
| C986 | 1020(14) | 7404(12) | 1624(8)    | 33.2(14) |
| F931 | 2929(4)  | 8797(3)  | -287.0(15) | 116(2)   |
| C931 | 3130(3)  | 8088(2)  | -125.0(14) | 57.7(19) |
| C932 | 2637(2)  | 7540(4)  | -18.6(16)  | 59(2)    |
| C933 | 2829(3)  | 6775(3)  | 147.6(18)  | 64(3)    |
| C934 | 3513(4)  | 6558(3)  | 207.4(16)  | 70(2)    |
| C935 | 4006(2)  | 7107(4)  | 101.0(16)  | 71(2)    |
| C936 | 3815(3)  | 7872(3)  | -65.3(15)  | 61(2)    |
| F951 | 4137(19) | 6064(17) | 350(8)     | 116(2)   |
| C951 | 3696(13) | 6740(14) | 193(9)     | 57.7(19) |
| C952 | 2995(13) | 6617(17) | 161(10)    | 59(2)    |
| C953 | 2560(12) | 7250(20) | 15(11)     | 64(3)    |
| C954 | 2826(17) | 8007(18) | -98(9)     | 70(2)    |
| C955 | 3527(18) | 8129(15) | -66(10)    | 71(2)    |
| C956 | 3961(13) | 7496(17) | 80(10)     | 61(2)    |
| C942 | 5632(3)  | -168(3)  | -117.1(16) | 51.5(12) |
| C943 | 5433(3)  | -565(3)  | 193.6(15)  | 50.1(12) |
| C944 | 4798(3)  | -398(3)  | 305.2(15)  | 49.9(12) |
| F941 | 4602(4)  | -773(5)  | 590(2)     | 79(2)    |

### 2.2.3. Anisotropic Displacement Parameters

| Atom | U <sub>11</sub> | U <sub>22</sub> | U <sub>33</sub> | U <sub>23</sub> | U <sub>13</sub> | U <sub>12</sub> |
|------|-----------------|-----------------|-----------------|-----------------|-----------------|-----------------|
| In1  | 23.26(12)       | 24.91(13)       | 27.12(14)       | 0.45(10)        | 2.73(10)        | 1.72(10)        |
| In2  | 28.04(13)       | 31.92(15)       | 31.54(16)       | -3.76(12)       | 4.95(11)        | -0.65(11)       |
| Al1  | 16.9(4)         | 17.6(5)         | 17.2(5)         | 0.2(4)          | 4.6(4)          | 0.5(4)          |
| Al1A | 17.8(5)         | 27.4(6)         | 22.3(5)         | -1.5(4)         | 4.1(4)          | 1.4(4)          |

|     |          |          |          |           |           |           |
|-----|----------|----------|----------|-----------|-----------|-----------|
| O1  | 27(2)    | 20.0(19) | 22.5(15) | -2.3(14)  | 7.4(13)   | -0.7(16)  |
| C1  | 32(2)    | 21.5(17) | 23.0(19) | -2.9(14)  | 3.4(15)   | 4.4(15)   |
| C2  | 36(3)    | 34(3)    | 38(3)    | -10(2)    | 1(2)      | 6(2)      |
| C3  | 36(3)    | 32(3)    | 46(4)    | -10(3)    | 19(3)     | -3(2)     |
| C4  | 57(5)    | 25(2)    | 34(3)    | -1(2)     | 10(4)     | 6(3)      |
| F1  | 35.8(18) | 61(3)    | 70(3)    | -29(2)    | 12.4(18)  | -17.5(17) |
| F2  | 53(2)    | 36(2)    | 40(2)    | 1.5(15)   | -20.7(17) | 17.6(17)  |
| F3  | 66(3)    | 49(3)    | 18.2(19) | -12.1(17) | -13.7(19) | 5(2)      |
| F4  | 70(3)    | 35.5(19) | 49(2)    | -6.3(16)  | 34.7(19)  | -9.6(17)  |
| F5  | 26.7(17) | 68(3)    | 69(4)    | -30(2)    | 10(2)     | -0.9(19)  |
| F6  | 51(3)    | 35(2)    | 84(3)    | -20(2)    | 44(2)     | -1.0(19)  |
| F7  | 71(3)    | 35.4(19) | 52(2)    | 0.4(16)   | -18(2)    | 18.3(19)  |
| F8  | 104(3)   | 30.6(18) | 43(2)    | 3.6(17)   | 40(2)     | -7(2)     |
| F9  | 62.8(18) | 21.9(12) | 47.8(16) | -7.2(11)  | 16.3(13)  | 0.4(12)   |
| O1B | 27(2)    | 20.0(19) | 22.5(15) | -2.3(14)  | 7.4(13)   | -0.7(16)  |
| C1B | 32(2)    | 21.5(17) | 23.0(19) | -2.9(14)  | 3.4(15)   | 4.4(15)   |
| C2B | 36(3)    | 34(3)    | 38(3)    | -10(2)    | 1(2)      | 6(2)      |
| C3B | 36(3)    | 32(3)    | 46(4)    | -10(3)    | 19(3)     | -3(2)     |
| C4B | 57(5)    | 25(2)    | 34(3)    | -1(2)     | 10(4)     | 6(3)      |
| F1B | 35.8(18) | 61(3)    | 70(3)    | -29(2)    | 12.4(18)  | -17.5(17) |
| F2B | 53(2)    | 36(2)    | 40(2)    | 1.5(15)   | -20.7(17) | 17.6(17)  |
| F3B | 66(3)    | 49(3)    | 18.2(19) | -12.1(17) | -13.7(19) | 5(2)      |
| F4B | 70(3)    | 35.5(19) | 49(2)    | -6.3(16)  | 34.7(19)  | -9.6(17)  |
| F5B | 26.7(17) | 68(3)    | 69(4)    | -30(2)    | 10(2)     | -0.9(19)  |
| F6B | 51(3)    | 35(2)    | 84(3)    | -20(2)    | 44(2)     | -1.0(19)  |
| F7B | 71(3)    | 35.4(19) | 52(2)    | 0.4(16)   | -18(2)    | 18.3(19)  |
| F8B | 104(3)   | 30.6(18) | 43(2)    | 3.6(17)   | 40(2)     | -7(2)     |
| F9B | 62.8(18) | 21.9(12) | 47.8(16) | -7.2(11)  | 16.3(13)  | 0.4(12)   |
| O2  | 16(4)    | 24(5)    | 12(4)    | -2(3)     | 3(3)      | 7(3)      |
| C5  | 17(3)    | 26.3(19) | 20(2)    | -2.0(15)  | 2(2)      | 2.2(18)   |
| C6  | 37.3(16) | 36(2)    | 31(2)    | -1.4(17)  | 0.8(15)   | 1.5(18)   |
| C7  | 37.3(16) | 36(2)    | 31(2)    | -1.4(17)  | 0.8(15)   | 1.5(18)   |
| C8  | 37.3(16) | 36(2)    | 31(2)    | -1.4(17)  | 0.8(15)   | 1.5(18)   |
| F10 | 54(3)    | 52(3)    | 42(3)    | -10(2)    | 24(2)     | 5(2)      |
| F11 | 83(7)    | 50(4)    | 25(3)    | -9(3)     | -7(4)     | -10(6)    |
| F12 | 67(6)    | 26(4)    | 64(8)    | -11(4)    | 1(4)      | -2(4)     |
| F13 | 34(3)    | 48(3)    | 64(4)    | 4(3)      | 6(2)      | -17(2)    |
| F14 | 28(3)    | 53(4)    | 53(5)    | -4(3)     | 13(3)     | 7(3)      |
| F15 | 31(5)    | 70(6)    | 76(8)    | 15(5)     | -23(6)    | 3(4)      |
| F16 | 46(3)    | 27(2)    | 49(3)    | 3.0(19)   | 1(2)      | 12.3(19)  |
| F17 | 29(3)    | 40(3)    | 65(4)    | 5(3)      | 12(3)     | -5(2)     |
| F18 | 67(6)    | 46(5)    | 23(3)    | 9(3)      | -4(3)     | -8(4)     |

|      |          |          |          |           |          |           |
|------|----------|----------|----------|-----------|----------|-----------|
| O2B  | 26(8)    | 28(8)    | 33(9)    | 0(6)      | -2(6)    | -2(6)     |
| C5B  | 17(3)    | 26.3(19) | 20(2)    | -2.0(15)  | 2(2)     | 2.2(18)   |
| C6B  | 37.3(16) | 36(2)    | 31(2)    | -1.4(17)  | 0.8(15)  | 1.5(18)   |
| C7B  | 37.3(16) | 36(2)    | 31(2)    | -1.4(17)  | 0.8(15)  | 1.5(18)   |
| C8B  | 37.3(16) | 36(2)    | 31(2)    | -1.4(17)  | 0.8(15)  | 1.5(18)   |
| F10B | 55(4)    | 43(4)    | 47(4)    | 10(3)     | -14(3)   | -25(3)    |
| F11B | 60(7)    | 55(5)    | 28(5)    | -3(5)     | -16(5)   | -16(6)    |
| F12B | 57(8)    | 54(10)   | 41(7)    | -27(6)    | -15(6)   | 27(7)     |
| F13B | 27(4)    | 84(8)    | 43(5)    | 2(5)      | 9(3)     | 13(5)     |
| F14B | 30(7)    | 71(9)    | 63(8)    | -3(6)     | -17(6)   | 7(5)      |
| F15B | 71(5)    | 55(4)    | 61(5)    | -18(4)    | -26(4)   | 39(4)     |
| F16B | 78(7)    | 48(6)    | 49(6)    | 28(4)     | -30(5)   | -36(5)    |
| F17B | 69(10)   | 51(6)    | 65(9)    | 36(6)     | -31(7)   | -15(6)    |
| F18B | 55(4)    | 100(7)   | 30(4)    | 2(4)      | 17(3)    | -27(4)    |
| O3   | 33.3(13) | 21.4(12) | 29.2(14) | 4.1(11)   | 14.4(11) | -1.7(10)  |
| C9   | 34.2(19) | 26.1(19) | 26(2)    | 5.1(15)   | 9.1(15)  | -7.1(15)  |
| C10  | 45(2)    | 24.5(19) | 35(2)    | 5.8(17)   | 9.6(18)  | -2.9(17)  |
| C11  | 46(2)    | 32(2)    | 37(2)    | 9.1(18)   | 6.2(19)  | -8.4(18)  |
| C12  | 46(2)    | 37(2)    | 37(2)    | -0.4(19)  | 20.0(19) | -13.3(19) |
| F19  | 74.3(19) | 25.4(12) | 42.3(15) | 3.4(11)   | 13.0(13) | -9.3(12)  |
| F20  | 40.1(13) | 46.7(15) | 43.9(15) | -7.5(12)  | 5.9(11)  | -7.2(11)  |
| F21  | 50.4(14) | 28.8(12) | 35.1(13) | 0(1)      | 14.4(11) | 4.8(10)   |
| F22  | 68.2(18) | 40.1(15) | 43.7(16) | 17.3(12)  | 2.4(13)  | -8.7(13)  |
| F23  | 46.8(14) | 34.6(13) | 54.3(17) | 8.2(12)   | 8.2(12)  | 9.3(11)   |
| F24  | 50.4(15) | 39.3(14) | 42.3(15) | 6.3(12)   | -4.2(12) | -8.7(12)  |
| F25  | 70.9(18) | 50.8(16) | 33.0(14) | -9.7(12)  | 23.6(13) | -17.0(14) |
| F26  | 67.1(18) | 40.8(15) | 52.5(17) | 1.4(13)   | 33.1(14) | -19.9(13) |
| F27  | 40.4(14) | 44.7(15) | 55.1(17) | -3.9(13)  | 22.2(12) | -1.6(12)  |
| O4   | 17.7(11) | 30.6(14) | 29.8(14) | 1.3(11)   | 3.5(10)  | 5.5(10)   |
| C13  | 19.1(16) | 42(2)    | 27(2)    | -5.2(17)  | 3.1(14)  | 6.2(15)   |
| C14  | 25.9(19) | 54(3)    | 44(3)    | -8(2)     | 9.0(18)  | 5.3(19)   |
| C15  | 25.6(19) | 44(2)    | 40(3)    | -4.3(19)  | -1.3(17) | 7.4(17)   |
| C16  | 28(2)    | 46(3)    | 54(3)    | 6(2)      | 14.3(19) | 1.1(18)   |
| F28  | 42.9(15) | 82(2)    | 33.0(15) | 9.0(14)   | 12.1(11) | 8.3(14)   |
| F29  | 37.0(13) | 62.1(18) | 48.4(16) | -27.3(14) | 2.5(12)  | 4.7(12)   |
| F30  | 36.4(14) | 84(2)    | 49.5(17) | -21.7(16) | 16.3(12) | 10.3(14)  |
| F31  | 45.1(15) | 33.5(14) | 71(2)    | -3.6(13)  | -0.3(13) | 14.4(12)  |
| F32  | 21.7(11) | 63.4(18) | 67.2(19) | -6.5(15)  | -3.1(11) | 11.0(12)  |
| F33  | 42.7(14) | 57.0(17) | 35.5(15) | 6.2(12)   | -6.7(11) | 8.8(12)   |
| F34  | 38.7(14) | 65.6(19) | 67(2)    | 4.4(16)   | 26.1(14) | -4.5(13)  |
| F35  | 43.1(14) | 39.5(15) | 72(2)    | 17.5(14)  | 18.5(13) | 2.9(12)   |
| F36  | 40.4(14) | 48.8(16) | 52.9(17) | -13.7(13) | 6.1(12)  | -10.0(12) |

|      |          |          |          |           |           |          |
|------|----------|----------|----------|-----------|-----------|----------|
| O1A  | 26(3)    | 29(4)    | 15(3)    | -4(3)     | -11(2)    | 12(3)    |
| C1A  | 19(3)    | 25(5)    | 26(4)    | 0(3)      | 0(3)      | 2(4)     |
| C2A  | 41(4)    | 26(3)    | 28(4)    | 2(3)      | 1(3)      | 11(3)    |
| C3A  | 36(4)    | 35(4)    | 49(5)    | -2(3)     | 15(4)     | 5(3)     |
| C4A  | 42(4)    | 43(4)    | 46(5)    | -5(4)     | 2(4)      | 8(4)     |
| F1A  | 52(3)    | 38(2)    | 39(3)    | -3.3(18)  | -1(2)     | -1(2)    |
| F2A  | 51(3)    | 25(2)    | 74(4)    | 3(2)      | -7(2)     | 7(2)     |
| F3A  | 48(3)    | 37(2)    | 41(3)    | 3.7(19)   | -6(2)     | 0.4(18)  |
| F4A  | 19(2)    | 72(4)    | 65(4)    | -22(4)    | -1(2)     | 2(3)     |
| F5A  | 42(3)    | 39(3)    | 68(5)    | -12(3)    | 25(4)     | 13(2)    |
| F6A  | 45(4)    | 59(4)    | 44(5)    | 9(3)      | 16(3)     | -6(3)    |
| F7A  | 64(3)    | 58(3)    | 40(3)    | 5(2)      | -4(2)     | 33(2)    |
| F8A  | 97(6)    | 101(5)   | 56(4)    | 20(4)     | 52(4)     | 30(4)    |
| F9A  | 64(4)    | 72(4)    | 30(3)    | -12(3)    | -14(2)    | 27(3)    |
| O1C  | 47(8)    | 38(7)    | 60(13)   | 21(6)     | 18(7)     | 30(5)    |
| C1C  | 31(7)    | 15(6)    | 22(5)    | 2(4)      | 2(4)      | -5(5)    |
| C2C  | 29(6)    | 34(7)    | 101(13)  | -6(7)     | -15(7)    | 2(5)     |
| C3C  | 38(6)    | 48(8)    | 49(8)    | -25(6)    | -9(6)     | 11(6)    |
| C4C  | 31(6)    | 59(8)    | 39(7)    | -6(6)     | -2(5)     | 0(5)     |
| F1C  | 52(3)    | 38(2)    | 39(3)    | -3.3(18)  | -1(2)     | -1(2)    |
| F2C  | 51(3)    | 25(2)    | 74(4)    | 3(2)      | -7(2)     | 7(2)     |
| F3C  | 48(3)    | 37(2)    | 41(3)    | 3.7(19)   | -6(2)     | 0.4(18)  |
| F4C  | 44(5)    | 80(8)    | 55(6)    | -42(5)    | -9(4)     | 12(4)    |
| F5C  | 48(5)    | 77(9)    | 72(9)    | -32(6)    | 14(6)     | 14(6)    |
| F6C  | 59(6)    | 81(9)    | 29(6)    | -2(5)     | 17(5)     | 19(6)    |
| F7C  | 40(4)    | 54(5)    | 80(6)    | 13(4)     | -18(4)    | 19(3)    |
| F8C  | 74(6)    | 72(6)    | 33(4)    | 3(4)      | -1(4)     | -7(5)    |
| F9C  | 44(4)    | 52(5)    | 65(6)    | -13(5)    | 0(4)      | -17(4)   |
| O2A  | 31.0(13) | 35.2(15) | 26.0(14) | 0.5(11)   | 14.2(11)  | 0.0(11)  |
| C5A  | 31.4(19) | 30(2)    | 27(2)    | -4.8(16)  | 13.2(15)  | -0.5(15) |
| C6A  | 80(4)    | 61(3)    | 40(3)    | 13(2)     | 20(3)     | 36(3)    |
| C7A  | 91(4)    | 46(3)    | 67(4)    | -27(3)    | 56(4)     | -32(3)   |
| C8A  | 31(2)    | 38(2)    | 45(3)    | -8.7(19)  | 5.5(18)   | 4.7(17)  |
| F10A | 216(5)   | 63(2)    | 67(2)    | 34(2)     | 55(3)     | 70(3)    |
| F11A | 62(2)    | 129(3)   | 32.6(16) | -7.3(18)  | -11.4(14) | 50(2)    |
| F12A | 114(3)   | 89(3)    | 28.8(16) | 7.0(16)   | 25.6(17)  | 31(2)    |
| F13A | 119(3)   | 50.1(19) | 116(3)   | -45(2)    | 80(3)     | -45(2)   |
| F14A | 110(3)   | 66(2)    | 102(3)   | -27(2)    | 82(2)     | -42(2)   |
| F15A | 36.6(16) | 137(4)   | 90(3)    | -58(3)    | 14.8(17)  | -24(2)   |
| F16A | 78(2)    | 65(2)    | 54.1(19) | 1.1(16)   | -9.5(16)  | 37.3(17) |
| F17A | 43.2(14) | 34.4(13) | 59.4(18) | -16.3(12) | 8.1(12)   | -7.4(11) |
| F18A | 41.0(14) | 56.8(18) | 75(2)    | -27.2(16) | 23.9(14)  | 0.4(13)  |

|      |          |        |          |          |           |        |
|------|----------|--------|----------|----------|-----------|--------|
| O3A  | 28(3)    | 39(4)  | 20.6(18) | 4.1(18)  | 6(2)      | -1(3)  |
| C9A  | 31(3)    | 45(4)  | 22(2)    | 6(3)     | 4(2)      | 6(3)   |
| C10A | 72(6)    | 73(6)  | 22(3)    | 11(3)    | 22(4)     | 17(4)  |
| C11A | 48(3)    | 54(3)  | 31(2)    | -2(2)    | 5(2)      | 6(2)   |
| C12A | 43(3)    | 108(8) | 27(4)    | 10(5)    | -6(3)     | 0(5)   |
| F19A | 100(4)   | 85(4)  | 64(3)    | 17(3)    | -16(3)    | 53(3)  |
| F20A | 85(4)    | 58(3)  | 54(3)    | -2(2)    | 9(3)      | 37(3)  |
| F21A | 94(4)    | 50(2)  | 51(2)    | 15.8(19) | 34(3)     | 3(3)   |
| F22A | 86(6)    | 88(6)  | 19.5(19) | 5(2)     | 6(3)      | 17(5)  |
| F23A | 79(7)    | 59(2)  | 49(2)    | -8(2)    | -6(5)     | 3(3)   |
| F24A | 54(3)    | 53(4)  | 47(2)    | -7(3)    | 21(2)     | 17(2)  |
| F25A | 47(2)    | 162(7) | 44(3)    | -7(4)    | -16.8(18) | -8(4)  |
| F26A | 34.5(19) | 141(5) | 47(2)    | 0(3)     | 6.4(17)   | 29(3)  |
| F27A | 62(4)    | 93(5)  | 42(2)    | 0(3)     | -5(2)     | -31(3) |
| O3C  | 28(3)    | 39(4)  | 20.6(18) | 4.1(18)  | 6(2)      | -1(3)  |
| C9C  | 31(3)    | 45(4)  | 22(2)    | 6(3)     | 4(2)      | 6(3)   |
| C10C | 72(6)    | 73(6)  | 22(3)    | 11(3)    | 22(4)     | 17(4)  |
| C11C | 48(3)    | 54(3)  | 31(2)    | -2(2)    | 5(2)      | 6(2)   |
| C12C | 43(3)    | 108(8) | 27(4)    | 10(5)    | -6(3)     | 0(5)   |
| F19C | 100(4)   | 85(4)  | 64(3)    | 17(3)    | -16(3)    | 53(3)  |
| F20C | 85(4)    | 58(3)  | 54(3)    | -2(2)    | 9(3)      | 37(3)  |
| F21C | 94(4)    | 50(2)  | 51(2)    | 15.8(19) | 34(3)     | 3(3)   |
| F22C | 86(6)    | 88(6)  | 19.5(19) | 5(2)     | 6(3)      | 17(5)  |
| F23C | 79(7)    | 59(2)  | 49(2)    | -8(2)    | -6(5)     | 3(3)   |
| F24C | 54(3)    | 53(4)  | 47(2)    | -7(3)    | 21(2)     | 17(2)  |
| F25C | 47(2)    | 162(7) | 44(3)    | -7(4)    | -16.8(18) | -8(4)  |
| F26C | 34.5(19) | 141(5) | 47(2)    | 0(3)     | 6.4(17)   | 29(3)  |
| F27C | 62(4)    | 93(5)  | 42(2)    | 0(3)     | -5(2)     | -31(3) |
| O4A  | 22(4)    | 20(4)  | 21(6)    | 7(3)     | 2(3)      | 2(3)   |
| C13A | 25(4)    | 29(5)  | 55(7)    | 0(5)     | 16(5)     | 0(4)   |
| C14A | 38(5)    | 30(4)  | 83(8)    | -9(4)    | 22(5)     | -7(4)  |
| C15A | 50(8)    | 45(7)  | 60(10)   | 9(6)     | 10(7)     | 3(6)   |
| C16A | 43(4)    | 47(5)  | 61(6)    | -11(4)   | -3(4)     | -7(3)  |
| F28A | 58(4)    | 30(3)  | 126(7)   | -14(4)   | 41(4)     | -15(3) |
| F29A | 67(7)    | 46(5)  | 100(10)  | -36(6)   | 45(6)     | -14(4) |
| F30A | 43(6)    | 31(3)  | 114(8)   | 8(4)     | 28(5)     | 8(5)   |
| F31A | 75(4)    | 65(4)  | 77(4)    | 30(3)    | 32(3)     | -2(3)  |
| F32A | 41(4)    | 58(5)  | 102(7)   | -5(4)    | 36(4)     | -13(3) |
| F33A | 44(4)    | 50(4)  | 48(4)    | -4(3)    | 17(3)     | 1(3)   |
| F34A | 25(2)    | 60(4)  | 83(5)    | -18(3)   | -3(2)     | 3(2)   |
| F35A | 53(4)    | 65(5)  | 41(5)    | -4(3)    | -5(3)     | -2(3)  |
| F36A | 47(3)    | 66(5)  | 101(6)   | -31(4)   | -8(4)     | -17(3) |

|      |          |          |          |           |          |          |
|------|----------|----------|----------|-----------|----------|----------|
| O4C  | 33(5)    | 18(5)    | 32(9)    | 5(4)      | 2(5)     | 3(4)     |
| C13C | 32(6)    | 29(6)    | 35(6)    | 5(5)      | 10(5)    | -3(4)    |
| C14C | 41(6)    | 35(5)    | 45(6)    | 9(4)      | 19(5)    | 2(5)     |
| C15C | 49(10)   | 31(7)    | 115(19)  | -17(9)    | 55(11)   | -16(7)   |
| C16C | 43(4)    | 47(5)    | 61(6)    | -11(4)    | -3(4)    | -7(3)    |
| F28C | 83(6)    | 27(3)    | 71(5)    | 7(3)      | 31(4)    | -4(3)    |
| F29C | 49(7)    | 42(4)    | 73(5)    | 7(4)      | 37(5)    | 14(6)    |
| F30C | 107(6)   | 55(4)    | 43(4)    | 19(3)     | 14(4)    | 5(4)     |
| F31C | 66(6)    | 80(6)    | 60(6)    | -24(5)    | 39(4)    | -10(5)   |
| F32C | 55(6)    | 55(5)    | 83(7)    | 8(4)      | 33(5)    | -19(4)   |
| F33C | 40(4)    | 59(5)    | 150(10)  | -11(5)    | 31(5)    | 7(3)     |
| F34C | 58(5)    | 64(5)    | 85(6)    | -5(5)     | -12(4)   | -25(4)   |
| F35C | 88(8)    | 69(6)    | 47(7)    | 20(5)     | -22(6)   | -13(6)   |
| F36C | 89(11)   | 69(10)   | 28(5)    | -12(4)    | 13(5)    | -30(7)   |
| C101 | 34(2)    | 57(3)    | 64(3)    | 1(3)      | 21(2)    | 10(2)    |
| O102 | 29.5(14) | 42.2(17) | 40.3(17) | -2.9(14)  | 1.0(12)  | 10.2(12) |
| C103 | 33(2)    | 47(3)    | 67(3)    | 10(2)     | 5(2)     | 15(2)    |
| C104 | 42(2)    | 47(3)    | 51(3)    | 2(2)      | -15(2)   | 19(2)    |
| O105 | 32.2(14) | 41.5(17) | 38.3(17) | 13.0(13)  | -1.7(12) | 3.2(12)  |
| C106 | 60(3)    | 42(3)    | 33(2)    | 6(2)      | -8(2)    | 16(2)    |
| C107 | 47(2)    | 44(3)    | 38(3)    | 19(2)     | 5(2)     | -1(2)    |
| O108 | 36.9(14) | 34.1(15) | 22.7(14) | 5.2(11)   | 3.0(11)  | 6.1(12)  |
| C109 | 32(2)    | 56(3)    | 33(2)    | 7(2)      | 13.0(17) | -1.3(19) |
| C110 | 35(2)    | 46(2)    | 33(2)    | 0.3(19)   | 11.4(17) | 12.5(18) |
| O111 | 31.3(14) | 38.4(16) | 28.4(15) | 7.1(12)   | 8.0(11)  | 9.5(12)  |
| C112 | 27.0(18) | 33(2)    | 33(2)    | 2.3(17)   | 0.7(16)  | 8.9(15)  |
| C113 | 37(2)    | 42(2)    | 33(2)    | 8.1(19)   | 0.0(17)  | 11.9(18) |
| O114 | 30.9(13) | 34.6(15) | 21.4(13) | 2.2(11)   | 3.5(10)  | 2.5(11)  |
| C115 | 52(3)    | 36(2)    | 27(2)    | 5.2(17)   | 11.4(18) | 4.4(19)  |
| C116 | 47(2)    | 46(3)    | 26(2)    | 2.5(18)   | 11.3(18) | -4(2)    |
| O117 | 34.2(15) | 39.1(17) | 48.5(19) | 10.4(14)  | 20.4(13) | 3.1(13)  |
| C118 | 32(2)    | 65(3)    | 40(3)    | -2(2)     | 15.5(19) | 3(2)     |
| C201 | 56(3)    | 26(2)    | 31(3)    | 6(2)      | 7(3)     | 9(2)     |
| O202 | 38.5(18) | 28.7(17) | 29.4(18) | 2.3(14)   | 10.3(14) | -4.1(15) |
| C203 | 49(3)    | 27(2)    | 39(3)    | -8(2)     | 20(3)    | -10(2)   |
| C204 | 46(3)    | 31(3)    | 47(3)    | -11(2)    | 16(3)    | -10(2)   |
| O205 | 31.2(17) | 39(2)    | 36(2)    | -15.6(16) | 5.2(15)  | -7.3(15) |
| C206 | 30(3)    | 53(4)    | 40(3)    | -10(3)    | 6(2)     | -7(3)    |
| C207 | 23(2)    | 60(4)    | 51(4)    | -6(3)     | 0(2)     | 3(2)     |
| O208 | 27.4(17) | 45(2)    | 38(2)    | -3.4(16)  | 2.5(14)  | 7.9(15)  |
| C209 | 43(3)    | 43(3)    | 38(3)    | -2(2)     | -1(2)    | 16(3)    |
| C210 | 56(3)    | 36(3)    | 31(3)    | 3(2)      | 4(2)     | 15(3)    |

|      |          |          |          |           |          |           |
|------|----------|----------|----------|-----------|----------|-----------|
| O211 | 41.7(19) | 30.2(18) | 31.1(19) | 3.3(15)   | 9.7(14)  | -3.1(15)  |
| C212 | 52(3)    | 33(3)    | 41(3)    | -1(2)     | 18(3)    | -7(2)     |
| C213 | 41(3)    | 35(3)    | 56(4)    | -4(3)     | 12(3)    | -13(3)    |
| O214 | 35.1(18) | 33.0(19) | 32.5(19) | -1.2(15)  | 2.7(15)  | -10.0(15) |
| C215 | 29(2)    | 50(3)    | 38(3)    | -2(3)     | 1(2)     | -13(2)    |
| C216 | 22(2)    | 53(3)    | 35(3)    | 4(2)      | -2.7(19) | -5(2)     |
| O217 | 31.0(17) | 36.4(19) | 34.6(19) | 2.2(15)   | 5.1(15)  | 3.5(14)   |
| C218 | 41(3)    | 45(3)    | 28(3)    | 7(2)      | 3(2)     | 7(2)      |
| C401 | 56(3)    | 26(2)    | 31(3)    | 6(2)      | 7(3)     | 9(2)      |
| O402 | 38.5(18) | 28.7(17) | 29.4(18) | 2.3(14)   | 10.3(14) | -4.1(15)  |
| C403 | 49(3)    | 27(2)    | 39(3)    | -8(2)     | 20(3)    | -10(2)    |
| C404 | 46(3)    | 31(3)    | 47(3)    | -11(2)    | 16(3)    | -10(2)    |
| O405 | 31.2(17) | 39(2)    | 36(2)    | -15.6(16) | 5.2(15)  | -7.3(15)  |
| C406 | 30(3)    | 53(4)    | 40(3)    | -10(3)    | 6(2)     | -7(3)     |
| C407 | 23(2)    | 60(4)    | 51(4)    | -6(3)     | 0(2)     | 3(2)      |
| O408 | 27.4(17) | 45(2)    | 38(2)    | -3.4(16)  | 2.5(14)  | 7.9(15)   |
| C409 | 43(3)    | 43(3)    | 38(3)    | -2(2)     | -1(2)    | 16(3)     |
| C410 | 56(3)    | 36(3)    | 31(3)    | 3(2)      | 4(2)     | 15(3)     |
| O411 | 41.7(19) | 30.2(18) | 31.1(19) | 3.3(15)   | 9.7(14)  | -3.1(15)  |
| C412 | 52(3)    | 33(3)    | 41(3)    | -1(2)     | 18(3)    | -7(2)     |
| C413 | 41(3)    | 35(3)    | 56(4)    | -4(3)     | 12(3)    | -13(3)    |
| O414 | 35.1(18) | 33.0(19) | 32.5(19) | -1.2(15)  | 2.7(15)  | -10.0(15) |
| C415 | 29(2)    | 50(3)    | 38(3)    | -2(3)     | 1(2)     | -13(2)    |
| C416 | 22(2)    | 53(3)    | 35(3)    | 4(2)      | -2.7(19) | -5(2)     |
| O417 | 31.0(17) | 36.4(19) | 34.6(19) | 2.2(15)   | 5.1(15)  | 3.5(14)   |
| C418 | 41(3)    | 45(3)    | 28(3)    | 7(2)      | 3(2)     | 7(2)      |
| F901 | 75(3)    | 62(3)    | 54(2)    | 12(2)     | -16(2)   | -15(2)    |
| C901 | 25(3)    | 35(3)    | 29(3)    | -4(2)     | -5(2)    | -5(3)     |
| C902 | 17(3)    | 33(3)    | 51(5)    | -4(3)     | 1(2)     | -3(2)     |
| C903 | 31(3)    | 34(4)    | 50(5)    | 0(4)      | 14(3)    | -11(2)    |
| C904 | 48(5)    | 29(3)    | 44(4)    | 5(3)      | 8(3)     | -5(3)     |
| C905 | 41(3)    | 24(3)    | 41(5)    | -8(3)     | 0(3)     | 3(2)      |
| C906 | 24(3)    | 39(4)    | 28(3)    | -6(2)     | 2(2)     | 0(3)      |
| F971 | 75(3)    | 62(3)    | 54(2)    | 12(2)     | -16(2)   | -15(2)    |
| C971 | 25(3)    | 35(3)    | 29(3)    | -4(2)     | -5(2)    | -5(3)     |
| C972 | 17(3)    | 33(3)    | 51(5)    | -4(3)     | 1(2)     | -3(2)     |
| C973 | 31(3)    | 34(4)    | 50(5)    | 0(4)      | 14(3)    | -11(2)    |
| C974 | 48(5)    | 29(3)    | 44(4)    | 5(3)      | 8(3)     | -5(3)     |
| C975 | 41(3)    | 24(3)    | 41(5)    | -8(3)     | 0(3)     | 3(2)      |
| C976 | 24(3)    | 39(4)    | 28(3)    | -6(2)     | 2(2)     | 0(3)      |
| F911 | 34.0(17) | 88(3)    | 59(2)    | 15(2)     | -0.7(16) | 7.9(18)   |
| C911 | 27(2)    | 32(3)    | 46(4)    | 5(3)      | 1(2)     | 1(2)      |



|      |          |        |       |        |          |         |
|------|----------|--------|-------|--------|----------|---------|
| C912 | 40(3)    | 37(4)  | 42(4) | -1(3)  | 13(3)    | 1(3)    |
| C913 | 51(3)    | 37(4)  | 26(3) | -1(2)  | -8(3)    | 4(3)    |
| C914 | 29(3)    | 33(3)  | 58(4) | -17(3) | -11(3)   | 3(2)    |
| C915 | 35(3)    | 35(3)  | 55(4) | -8(3)  | 11(3)    | -6(2)   |
| C916 | 41(3)    | 29(3)  | 36(3) | 2(2)   | 5(2)     | -2(2)   |
| F961 | 34.0(17) | 88(3)  | 59(2) | 15(2)  | -0.7(16) | 7.9(18) |
| C961 | 27(2)    | 32(3)  | 46(4) | 5(3)   | 1(2)     | 1(2)    |
| C962 | 40(3)    | 37(4)  | 42(4) | -1(3)  | 13(3)    | 1(3)    |
| C963 | 51(3)    | 37(4)  | 26(3) | -1(2)  | -8(3)    | 4(3)    |
| C964 | 29(3)    | 33(3)  | 58(4) | -17(3) | -11(3)   | 3(2)    |
| C965 | 35(3)    | 35(3)  | 55(4) | -8(3)  | 11(3)    | -6(2)   |
| C966 | 41(3)    | 29(3)  | 36(3) | 2(2)   | 5(2)     | -2(2)   |
| F921 | 53(2)    | 132(4) | 52(2) | 0(3)   | 2.0(19)  | -34(3)  |
| C921 | 26(3)    | 111(7) | 34(4) | -11(4) | 13(3)    | -25(4)  |
| C922 | 37(3)    | 92(6)  | 31(3) | 4(3)   | 9(3)     | 33(4)   |
| C923 | 72(5)    | 32(3)  | 64(5) | -16(3) | 14(4)    | 10(3)   |
| C924 | 63(4)    | 36(4)  | 35(4) | -18(3) | 1(3)     | -9(3)   |
| C925 | 47(3)    | 43(4)  | 14(3) | -5(2)  | -9(2)    | -11(3)  |
| C926 | 36(3)    | 42(3)  | 21(3) | -4(2)  | 1(2)     | -13(2)  |
| F981 | 53(2)    | 132(4) | 52(2) | 0(3)   | 2.0(19)  | -34(3)  |
| C981 | 26(3)    | 111(7) | 34(4) | -11(4) | 13(3)    | -25(4)  |
| C982 | 37(3)    | 92(6)  | 31(3) | 4(3)   | 9(3)     | 33(4)   |
| C983 | 72(5)    | 32(3)  | 64(5) | -16(3) | 14(4)    | 10(3)   |
| C984 | 63(4)    | 36(4)  | 35(4) | -18(3) | 1(3)     | -9(3)   |
| C985 | 47(3)    | 43(4)  | 14(3) | -5(2)  | -9(2)    | -11(3)  |
| C986 | 36(3)    | 42(3)  | 21(3) | -4(2)  | 1(2)     | -13(2)  |
| F931 | 207(5)   | 62(3)  | 83(3) | -3(2)  | 31(3)    | 31(3)   |
| C931 | 111(6)   | 30(3)  | 36(4) | -9(2)  | 26(4)    | 5(3)    |
| C932 | 59(4)    | 77(6)  | 45(4) | -25(4) | 27(3)    | 2(4)    |
| C933 | 101(6)   | 55(4)  | 45(4) | -17(3) | 46(4)    | -37(5)  |
| C934 | 127(8)   | 54(5)  | 30(3) | 6(3)   | 16(4)    | 1(4)    |
| C935 | 64(4)    | 114(7) | 34(4) | -10(5) | 0(3)     | 2(5)    |
| C936 | 76(5)    | 72(5)  | 38(4) | -18(4) | 19(4)    | -41(4)  |
| F951 | 207(5)   | 62(3)  | 83(3) | -3(2)  | 31(3)    | 31(3)   |
| C951 | 111(6)   | 30(3)  | 36(4) | -9(2)  | 26(4)    | 5(3)    |
| C952 | 59(4)    | 77(6)  | 45(4) | -25(4) | 27(3)    | 2(4)    |
| C953 | 101(6)   | 55(4)  | 45(4) | -17(3) | 46(4)    | -37(5)  |
| C954 | 127(8)   | 54(5)  | 30(3) | 6(3)   | 16(4)    | 1(4)    |
| C955 | 64(4)    | 114(7) | 34(4) | -10(5) | 0(3)     | 2(5)    |
| C956 | 76(5)    | 72(5)  | 38(4) | -18(4) | 19(4)    | -41(4)  |
| C942 | 45(3)    | 48(3)  | 62(3) | -6(3)  | 10(2)    | 2(2)    |
| C943 | 53(3)    | 40(3)  | 54(3) | -2(2)  | -9(2)    | 9(2)    |

|      |       |       |       |       |       |        |
|------|-------|-------|-------|-------|-------|--------|
| C944 | 69(3) | 38(3) | 43(3) | -3(2) | 7(2)  | -6(2)  |
| F941 | 89(5) | 79(5) | 75(5) | 13(4) | 37(4) | -10(4) |

#### 2.2.4. Bond Lengths

| Atom | Atom | Length/Å  | Atom | Atom | Length/Å  |
|------|------|-----------|------|------|-----------|
| A11  | O1   | 1.752(10) | C10C | F21C | 1.353(9)  |
| A11  | O1B  | 1.69(3)   | C11C | F22C | 1.346(8)  |
| A11  | O2   | 1.739(13) | C11C | F23C | 1.349(9)  |
| A11  | O2B  | 1.689(17) | C11C | F24C | 1.318(8)  |
| A11  | O3   | 1.729(3)  | C12C | F25C | 1.324(7)  |
| A11  | O4   | 1.720(2)  | C12C | F26C | 1.364(9)  |
| A11A | O1A  | 1.790(9)  | C12C | F27C | 1.326(9)  |
| A11A | O1C  | 1.606(15) | O4A  | C13A | 1.347(10) |
| A11A | O2A  | 1.721(3)  | C13A | C14A | 1.547(10) |
| A11A | O3A  | 1.72(2)   | C13A | C15A | 1.551(10) |
| A11A | O3C  | 1.726(11) | C13A | C16A | 1.552(11) |
| A11A | O4A  | 1.694(13) | C14A | F28A | 1.338(8)  |
| A11A | O4C  | 1.758(14) | C14A | F29A | 1.326(11) |
| O1   | C1   | 1.350(7)  | C14A | F30A | 1.326(11) |
| C1   | C2   | 1.538(8)  | C15A | F31A | 1.326(11) |
| C1   | C3   | 1.566(7)  | C15A | F32A | 1.346(11) |
| C1   | C4   | 1.548(7)  | C15A | F33A | 1.338(11) |
| C2   | F1   | 1.341(7)  | C16A | F34A | 1.328(10) |
| C2   | F2   | 1.351(6)  | C16A | F35A | 1.346(10) |
| C2   | F3   | 1.321(7)  | C16A | F36A | 1.347(10) |
| C3   | F4   | 1.309(7)  | O4C  | C13C | 1.354(11) |
| C3   | F5   | 1.348(7)  | C13C | C14C | 1.540(10) |
| C3   | F6   | 1.339(7)  | C13C | C15C | 1.539(11) |
| C4   | F7   | 1.295(7)  | C13C | C16C | 1.544(10) |
| C4   | F8   | 1.331(7)  | C14C | F28C | 1.330(10) |
| C4   | F9   | 1.342(8)  | C14C | F29C | 1.321(9)  |
| O1B  | C1B  | 1.353(12) | C14C | F30C | 1.328(9)  |
| C1B  | C2B  | 1.560(12) | C15C | F31C | 1.331(12) |
| C1B  | C3B  | 1.547(12) | C15C | F32C | 1.337(11) |
| C1B  | C4B  | 1.543(12) | C15C | F33C | 1.335(12) |
| C2B  | F1B  | 1.304(12) | C16C | F34C | 1.345(9)  |
| C2B  | F2B  | 1.331(11) | C16C | F35C | 1.324(10) |
| C2B  | F3B  | 1.339(12) | C16C | F36C | 1.329(11) |
| C3B  | F4B  | 1.349(12) | C101 | O102 | 1.424(6)  |
| C3B  | F5B  | 1.347(12) | C101 | C118 | 1.465(7)  |
| C3B  | F6B  | 1.327(12) | O102 | C103 | 1.407(5)  |
| C4B  | F7B  | 1.345(12) | C103 | C104 | 1.453(7)  |

|     |      |           |      |      |           |
|-----|------|-----------|------|------|-----------|
| C4B | F8B  | 1.367(12) | C104 | O105 | 1.417(5)  |
| C4B | F9B  | 1.333(13) | O105 | C106 | 1.392(5)  |
| O2  | C5   | 1.341(9)  | C106 | C107 | 1.476(6)  |
| C5  | C6   | 1.554(9)  | C107 | O108 | 1.411(5)  |
| C5  | C7   | 1.566(9)  | O108 | C109 | 1.399(5)  |
| C5  | C8   | 1.552(9)  | C109 | C110 | 1.459(6)  |
| C6  | F10  | 1.332(7)  | C110 | O111 | 1.399(5)  |
| C6  | F11  | 1.338(9)  | O111 | C112 | 1.398(5)  |
| C6  | F12  | 1.316(11) | C112 | C113 | 1.484(6)  |
| C7  | F13  | 1.348(8)  | C113 | O114 | 1.407(5)  |
| C7  | F14  | 1.338(9)  | O114 | C115 | 1.412(5)  |
| C7  | F15  | 1.316(11) | C115 | C116 | 1.471(6)  |
| C8  | F16  | 1.313(8)  | C116 | O117 | 1.409(5)  |
| C8  | F17  | 1.338(8)  | O117 | C118 | 1.409(5)  |
| C8  | F18  | 1.333(10) | C201 | O202 | 1.412(6)  |
| O2B | C5B  | 1.346(11) | C201 | C218 | 1.490(8)  |
| C5B | C6B  | 1.554(10) | O202 | C203 | 1.417(6)  |
| C5B | C7B  | 1.566(11) | C203 | C204 | 1.481(8)  |
| C5B | C8B  | 1.553(10) | C204 | O205 | 1.430(6)  |
| C6B | F10B | 1.338(9)  | O205 | C206 | 1.407(7)  |
| C6B | F11B | 1.326(11) | C206 | C207 | 1.474(8)  |
| C6B | F12B | 1.321(12) | C207 | O208 | 1.425(6)  |
| C7B | F13B | 1.343(10) | O208 | C209 | 1.427(6)  |
| C7B | F14B | 1.332(12) | C209 | C210 | 1.483(8)  |
| C7B | F15B | 1.319(10) | C210 | O211 | 1.420(7)  |
| C8B | F16B | 1.317(10) | O211 | C212 | 1.419(6)  |
| C8B | F17B | 1.345(12) | C212 | C213 | 1.486(11) |
| C8B | F18B | 1.326(10) | C213 | O214 | 1.403(10) |
| O3  | C9   | 1.348(4)  | O214 | C215 | 1.424(6)  |
| C9  | C10  | 1.559(5)  | C215 | C216 | 1.480(8)  |
| C9  | C11  | 1.563(5)  | C216 | O217 | 1.433(6)  |
| C9  | C12  | 1.552(5)  | O217 | C218 | 1.413(6)  |
| C10 | F19  | 1.342(4)  | C401 | O402 | 1.405(15) |
| C10 | F20  | 1.322(5)  | C401 | C418 | 1.468(16) |
| C10 | F21  | 1.322(4)  | O402 | C403 | 1.410(15) |
| C11 | F22  | 1.334(4)  | C403 | C404 | 1.449(16) |
| C11 | F23  | 1.342(5)  | C404 | O405 | 1.426(15) |
| C11 | F24  | 1.328(5)  | O405 | C406 | 1.406(15) |
| C12 | F25  | 1.333(5)  | C406 | C407 | 1.476(16) |
| C12 | F26  | 1.348(5)  | C407 | O408 | 1.423(14) |
| C12 | F27  | 1.320(5)  | O408 | C409 | 1.416(15) |
| O4  | C13  | 1.358(4)  | C409 | C410 | 1.471(16) |

|     |     |           |      |      |           |
|-----|-----|-----------|------|------|-----------|
| C13 | C14 | 1.543(5)  | C410 | O411 | 1.407(15) |
| C13 | C15 | 1.546(5)  | O411 | C412 | 1.407(17) |
| C13 | C16 | 1.572(6)  | C412 | C413 | 1.476(18) |
| C14 | F28 | 1.323(5)  | C413 | O414 | 1.396(15) |
| C14 | F29 | 1.332(5)  | O414 | C415 | 1.423(15) |
| C14 | F30 | 1.340(4)  | C415 | C416 | 1.475(16) |
| C15 | F31 | 1.332(5)  | C416 | O417 | 1.419(14) |
| C15 | F32 | 1.342(4)  | O417 | C418 | 1.411(15) |
| C15 | F33 | 1.317(5)  | F901 | C901 | 1.303(6)  |
| C16 | F34 | 1.336(4)  | C901 | C902 | 1.3900    |
| C16 | F35 | 1.334(5)  | C901 | C906 | 1.3900    |
| C16 | F36 | 1.314(5)  | C902 | C903 | 1.3900    |
| O1A | C1A | 1.363(9)  | C903 | C904 | 1.3900    |
| C1A | C2A | 1.541(9)  | C904 | C905 | 1.3900    |
| C1A | C3A | 1.554(8)  | C905 | C906 | 1.3900    |
| C1A | C4A | 1.579(9)  | F971 | C971 | 1.34(2)   |
| C2A | F1A | 1.329(8)  | C971 | C972 | 1.3900    |
| C2A | F2A | 1.336(7)  | C971 | C976 | 1.3900    |
| C2A | F3A | 1.288(7)  | C972 | C973 | 1.3900    |
| C3A | F4A | 1.339(8)  | C973 | C974 | 1.3900    |
| C3A | F5A | 1.342(8)  | C974 | C975 | 1.3900    |
| C3A | F6A | 1.321(8)  | C975 | C976 | 1.3900    |
| C4A | F7A | 1.329(7)  | F911 | C911 | 1.313(6)  |
| C4A | F8A | 1.332(9)  | C911 | C912 | 1.3900    |
| C4A | F9A | 1.319(8)  | C911 | C916 | 1.3900    |
| O1C | C1C | 1.360(11) | C912 | C913 | 1.3900    |
| C1C | C2C | 1.553(10) | C913 | C914 | 1.3900    |
| C1C | C3C | 1.550(11) | C914 | C915 | 1.3900    |
| C1C | C4C | 1.565(11) | C915 | C916 | 1.3900    |
| C2C | F1C | 1.348(10) | F961 | C961 | 1.32(2)   |
| C2C | F2C | 1.334(10) | C961 | C962 | 1.3900    |
| C2C | F3C | 1.330(11) | C961 | C966 | 1.3900    |
| C3C | F4C | 1.332(10) | C962 | C963 | 1.3900    |
| C3C | F5C | 1.358(11) | C963 | C964 | 1.3900    |
| C3C | F6C | 1.313(12) | C964 | C965 | 1.3900    |
| C4C | F7C | 1.330(10) | C965 | C966 | 1.3900    |
| C4C | F8C | 1.315(10) | F921 | C921 | 1.248(7)  |
| C4C | F9C | 1.336(11) | C921 | C922 | 1.3900    |
| O2A | C5A | 1.343(4)  | C921 | C926 | 1.3900    |
| C5A | C6A | 1.545(6)  | C922 | C923 | 1.3900    |
| C5A | C7A | 1.567(6)  | C923 | C924 | 1.3900    |
| C5A | C8A | 1.535(5)  | C924 | C925 | 1.3900    |

|      |      |           |      |                   |          |
|------|------|-----------|------|-------------------|----------|
| C6A  | F10A | 1.343(6)  | C925 | C926              | 1.3900   |
| C6A  | F11A | 1.323(7)  | F981 | C981              | 1.41(3)  |
| C6A  | F12A | 1.323(5)  | C981 | C982              | 1.3900   |
| C7A  | F13A | 1.324(6)  | C981 | C986              | 1.3900   |
| C7A  | F14A | 1.332(5)  | C982 | C983              | 1.3900   |
| C7A  | F15A | 1.322(7)  | C983 | C984              | 1.3900   |
| C8A  | F16A | 1.316(5)  | C984 | C985              | 1.3900   |
| C8A  | F17A | 1.338(5)  | C985 | C986              | 1.3900   |
| C8A  | F18A | 1.332(5)  | F931 | C931              | 1.310(6) |
| O3A  | C9A  | 1.355(12) | C931 | C932              | 1.3900   |
| C9A  | C10A | 1.540(12) | C931 | C936              | 1.3900   |
| C9A  | C11A | 1.551(12) | C932 | C933              | 1.3900   |
| C9A  | C12A | 1.540(12) | C933 | C934              | 1.3900   |
| C10A | F19A | 1.342(12) | C934 | C935              | 1.3900   |
| C10A | F20A | 1.324(11) | C935 | C936              | 1.3900   |
| C10A | F21A | 1.337(11) | F951 | C951              | 1.46(4)  |
| C11A | F22A | 1.337(13) | C951 | C952              | 1.3900   |
| C11A | F23A | 1.336(13) | C951 | C956              | 1.3900   |
| C11A | F24A | 1.309(13) | C952 | C953              | 1.3900   |
| C12A | F25A | 1.299(12) | C953 | C954              | 1.3900   |
| C12A | F26A | 1.345(12) | C954 | C955              | 1.3900   |
| C12A | F27A | 1.335(13) | C955 | C956              | 1.3900   |
| O3C  | C9C  | 1.358(7)  | C942 | C943              | 1.368(8) |
| C9C  | C10C | 1.554(9)  | C942 | C944 <sup>1</sup> | 1.366(8) |
| C9C  | C11C | 1.552(8)  | C943 | C944              | 1.378(8) |
| C9C  | C12C | 1.534(8)  | C944 | C942 <sup>1</sup> | 1.366(8) |
| C10C | F19C | 1.301(8)  | C944 | F941              | 1.273(8) |
| C10C | F20C | 1.336(8)  |      |                   |          |

### 2.2.5. Bond Angles

| Atom | Atom | Atom | Angle/°   | Atom | Atom | Atom | Angle/°  |
|------|------|------|-----------|------|------|------|----------|
| O1B  | All  | O1   | 3.9(17)   | C8A  | C5A  | C7A  | 109.1(3) |
| O1B  | All  | O2   | 110.2(14) | F10A | C6A  | C5A  | 109.3(5) |
| O1B  | All  | O3   | 103.0(12) | F11A | C6A  | C5A  | 110.4(4) |
| O1B  | All  | O4   | 115.8(14) | F11A | C6A  | F10A | 107.6(5) |
| O2   | All  | O1   | 108.9(8)  | F11A | C6A  | F12A | 107.8(5) |
| O2B  | All  | O1   | 107.1(11) | F12A | C6A  | C5A  | 114.0(4) |
| O2B  | All  | O1B  | 107.9(15) | F12A | C6A  | F10A | 107.4(4) |
| O2B  | All  | O2   | 7.3(15)   | F13A | C7A  | C5A  | 109.9(4) |
| O2B  | All  | O3   | 110.5(10) | F13A | C7A  | F14A | 108.6(4) |
| O2B  | All  | O4   | 111.5(9)  | F14A | C7A  | C5A  | 112.2(4) |
| O3   | All  | O1   | 106.8(4)  | F15A | C7A  | C5A  | 110.8(4) |

|     |      |     |            |      |      |      |           |
|-----|------|-----|------------|------|------|------|-----------|
| O3  | Al1  | O2  | 115.9(7)   | F15A | C7A  | F13A | 108.0(5)  |
| O4  | Al1  | O1  | 113.1(5)   | F15A | C7A  | F14A | 107.2(5)  |
| O4  | Al1  | O2  | 104.6(6)   | F16A | C8A  | C5A  | 110.4(3)  |
| O4  | Al1  | O3  | 107.82(13) | F16A | C8A  | F17A | 106.5(4)  |
| O1C | Al1A | O1A | 8.3(13)    | F16A | C8A  | F18A | 108.8(4)  |
| O1C | Al1A | O2A | 118.3(9)   | F17A | C8A  | C5A  | 111.3(3)  |
| O1C | Al1A | O3A | 103.5(13)  | F18A | C8A  | C5A  | 113.1(4)  |
| O1C | Al1A | O3C | 101.4(9)   | F18A | C8A  | F17A | 106.5(3)  |
| O1C | Al1A | O4A | 102.1(9)   | C9A  | O3A  | Al1A | 152(2)    |
| O1C | Al1A | O4C | 110.8(9)   | O3A  | C9A  | C10A | 110.9(15) |
| O2A | Al1A | O1A | 110.2(5)   | O3A  | C9A  | C11A | 109.7(15) |
| O2A | Al1A | O3C | 109.9(3)   | O3A  | C9A  | C12A | 108.8(13) |
| O2A | Al1A | O4C | 109.2(7)   | C10A | C9A  | C11A | 108.6(11) |
| O3A | Al1A | O1A | 108.0(11)  | C10A | C9A  | C12A | 110.8(10) |
| O3A | Al1A | O2A | 101.3(9)   | C12A | C9A  | C11A | 108.0(11) |
| O3A | Al1A | O3C | 9.3(12)    | F19A | C10A | C9A  | 110.8(11) |
| O3A | Al1A | O4C | 113.4(11)  | F20A | C10A | C9A  | 109.1(10) |
| O3C | Al1A | O1A | 107.1(6)   | F20A | C10A | F19A | 105.3(11) |
| O3C | Al1A | O4C | 106.3(7)   | F20A | C10A | F21A | 111.8(12) |
| O4A | Al1A | O1A | 104.1(5)   | F21A | C10A | C9A  | 110.1(10) |
| O4A | Al1A | O2A | 107.4(6)   | F21A | C10A | F19A | 109.8(12) |
| O4A | Al1A | O3A | 125.5(11)  | F22A | C11A | C9A  | 110.7(16) |
| O4A | Al1A | O3C | 117.9(6)   | F23A | C11A | C9A  | 109.8(15) |
| O4A | Al1A | O4C | 12.6(8)    | F23A | C11A | F22A | 106.8(18) |
| O4C | Al1A | O1A | 114.0(6)   | F24A | C11A | C9A  | 109.8(13) |
| C1  | O1   | Al1 | 143.9(10)  | F24A | C11A | F22A | 107.9(17) |
| O1  | C1   | C2  | 112.3(8)   | F24A | C11A | F23A | 111.8(16) |
| O1  | C1   | C3  | 111.7(7)   | F25A | C12A | C9A  | 113.5(12) |
| O1  | C1   | C4  | 107.1(7)   | F25A | C12A | F26A | 110.5(12) |
| C2  | C1   | C3  | 107.5(5)   | F25A | C12A | F27A | 108.3(12) |
| C2  | C1   | C4  | 110.2(5)   | F26A | C12A | C9A  | 109.3(11) |
| C4  | C1   | C3  | 108.0(5)   | F27A | C12A | C9A  | 108.6(10) |
| F1  | C2   | C1  | 110.4(5)   | F27A | C12A | F26A | 106.3(12) |
| F1  | C2   | F2  | 108.3(5)   | C9C  | O3C  | Al1A | 145.2(10) |
| F2  | C2   | C1  | 109.7(5)   | O3C  | C9C  | C10C | 109.3(7)  |
| F3  | C2   | C1  | 113.0(5)   | O3C  | C9C  | C11C | 106.9(7)  |
| F3  | C2   | F1  | 108.0(6)   | O3C  | C9C  | C12C | 112.4(6)  |
| F3  | C2   | F2  | 107.3(6)   | C11C | C9C  | C10C | 109.4(6)  |
| F4  | C3   | C1  | 111.8(5)   | C12C | C9C  | C10C | 108.8(6)  |
| F4  | C3   | F5  | 108.2(5)   | C12C | C9C  | C11C | 110.0(6)  |
| F4  | C3   | F6  | 106.9(6)   | F19C | C10C | C9C  | 113.8(7)  |
| F5  | C3   | C1  | 109.9(5)   | F19C | C10C | F20C | 110.2(6)  |

|     |     |     |           |      |      |      |           |
|-----|-----|-----|-----------|------|------|------|-----------|
| F6  | C3  | C1  | 112.7(5)  | F19C | C10C | F21C | 106.6(6)  |
| F6  | C3  | F5  | 107.2(6)  | F20C | C10C | C9C  | 111.0(6)  |
| F7  | C4  | C1  | 112.9(5)  | F20C | C10C | F21C | 106.3(7)  |
| F7  | C4  | F8  | 106.8(5)  | F21C | C10C | C9C  | 108.6(5)  |
| F7  | C4  | F9  | 107.7(7)  | F22C | C11C | C9C  | 111.9(8)  |
| F8  | C4  | C1  | 109.1(5)  | F22C | C11C | F23C | 107.6(9)  |
| F8  | C4  | F9  | 107.7(8)  | F23C | C11C | C9C  | 109.8(8)  |
| F9  | C4  | C1  | 112.4(8)  | F24C | C11C | C9C  | 112.6(7)  |
| C1B | O1B | A11 | 151(3)    | F24C | C11C | F22C | 108.8(8)  |
| O1B | C1B | C2B | 110.0(18) | F24C | C11C | F23C | 105.9(8)  |
| O1B | C1B | C3B | 110.3(18) | F25C | C12C | C9C  | 112.5(6)  |
| O1B | C1B | C4B | 109.8(17) | F25C | C12C | F26C | 106.5(6)  |
| C3B | C1B | C2B | 107.4(9)  | F25C | C12C | F27C | 108.2(7)  |
| C4B | C1B | C2B | 108.6(10) | F26C | C12C | C9C  | 110.9(6)  |
| C4B | C1B | C3B | 110.6(10) | F27C | C12C | C9C  | 111.8(6)  |
| F1B | C2B | C1B | 110.6(12) | F27C | C12C | F26C | 106.4(6)  |
| F1B | C2B | F2B | 111.9(12) | C13A | O4A  | A11A | 148.4(13) |
| F1B | C2B | F3B | 108.1(14) | O4A  | C13A | C14A | 108.7(9)  |
| F2B | C2B | C1B | 108.8(10) | O4A  | C13A | C15A | 112.7(10) |
| F2B | C2B | F3B | 107.5(12) | O4A  | C13A | C16A | 109.6(8)  |
| F3B | C2B | C1B | 109.9(12) | C14A | C13A | C15A | 109.3(8)  |
| F4B | C3B | C1B | 108.3(10) | C14A | C13A | C16A | 108.6(7)  |
| F5B | C3B | C1B | 111.2(10) | C15A | C13A | C16A | 107.9(7)  |
| F5B | C3B | F4B | 108.3(10) | F28A | C14A | C13A | 112.1(6)  |
| F6B | C3B | C1B | 114.5(13) | F29A | C14A | C13A | 110.5(9)  |
| F6B | C3B | F4B | 105.0(12) | F29A | C14A | F28A | 108.8(10) |
| F6B | C3B | F5B | 109.2(13) | F30A | C14A | C13A | 110.4(8)  |
| F7B | C4B | C1B | 109.9(11) | F30A | C14A | F28A | 106.1(9)  |
| F7B | C4B | F8B | 113.7(12) | F30A | C14A | F29A | 108.8(10) |
| F8B | C4B | C1B | 108.8(10) | F31A | C15A | C13A | 110.2(8)  |
| F9B | C4B | C1B | 112.4(18) | F31A | C15A | F32A | 110.0(9)  |
| F9B | C4B | F7B | 107.0(18) | F31A | C15A | F33A | 106.8(8)  |
| F9B | C4B | F8B | 105.0(18) | F32A | C15A | C13A | 112.5(8)  |
| C5  | O2  | A11 | 149.7(15) | F33A | C15A | C13A | 110.8(8)  |
| O2  | C5  | C6  | 107.9(10) | F33A | C15A | F32A | 106.3(9)  |
| O2  | C5  | C7  | 111.8(10) | F34A | C16A | C13A | 111.1(8)  |
| O2  | C5  | C8  | 111.1(11) | F34A | C16A | F35A | 107.2(9)  |
| C6  | C5  | C7  | 108.4(6)  | F34A | C16A | F36A | 107.1(7)  |
| C8  | C5  | C6  | 110.4(6)  | F35A | C16A | C13A | 111.1(8)  |
| C8  | C5  | C7  | 107.2(6)  | F35A | C16A | F36A | 106.7(9)  |
| F10 | C6  | C5  | 110.6(6)  | F36A | C16A | C13A | 113.3(8)  |
| F10 | C6  | F11 | 107.3(7)  | C13C | O4C  | A11A | 149.7(15) |

|      |     |      |           |      |      |      |           |
|------|-----|------|-----------|------|------|------|-----------|
| F11  | C6  | C5   | 111.5(8)  | O4C  | C13C | C14C | 106.4(9)  |
| F12  | C6  | C5   | 111.2(10) | O4C  | C13C | C15C | 109.6(12) |
| F12  | C6  | F10  | 108.0(8)  | O4C  | C13C | C16C | 111.3(10) |
| F12  | C6  | F11  | 108.1(10) | C14C | C13C | C16C | 108.9(8)  |
| F13  | C7  | C5   | 110.0(6)  | C15C | C13C | C14C | 110.3(8)  |
| F14  | C7  | C5   | 110.2(6)  | C15C | C13C | C16C | 110.2(8)  |
| F14  | C7  | F13  | 108.0(6)  | F28C | C14C | C13C | 112.4(8)  |
| F15  | C7  | C5   | 113.9(10) | F29C | C14C | C13C | 110.0(10) |
| F15  | C7  | F13  | 108.3(10) | F29C | C14C | F28C | 108.4(11) |
| F15  | C7  | F14  | 106.3(10) | F29C | C14C | F30C | 108.6(11) |
| F16  | C8  | C5   | 112.1(6)  | F30C | C14C | C13C | 109.2(7)  |
| F16  | C8  | F17  | 106.6(6)  | F30C | C14C | F28C | 108.1(8)  |
| F16  | C8  | F18  | 107.2(8)  | F31C | C15C | C13C | 111.5(9)  |
| F17  | C8  | C5   | 109.3(6)  | F31C | C15C | F32C | 106.9(10) |
| F18  | C8  | C5   | 113.4(9)  | F31C | C15C | F33C | 105.8(11) |
| F18  | C8  | F17  | 108.0(8)  | F32C | C15C | C13C | 112.5(10) |
| C5B  | O2B | A11  | 155(2)    | F33C | C15C | C13C | 111.4(9)  |
| O2B  | C5B | C6B  | 109.9(14) | F33C | C15C | F32C | 108.4(10) |
| O2B  | C5B | C7B  | 109.1(13) | F34C | C16C | C13C | 110.5(8)  |
| O2B  | C5B | C8B  | 111.1(14) | F35C | C16C | C13C | 111.5(8)  |
| C6B  | C5B | C7B  | 108.3(8)  | F35C | C16C | F34C | 108.4(9)  |
| C8B  | C5B | C6B  | 110.0(8)  | F35C | C16C | F36C | 107.2(11) |
| C8B  | C5B | C7B  | 108.3(8)  | F36C | C16C | C13C | 111.3(9)  |
| F10B | C6B | C5B  | 110.2(7)  | F36C | C16C | F34C | 107.7(11) |
| F11B | C6B | C5B  | 112.7(11) | O102 | C101 | C118 | 111.3(4)  |
| F11B | C6B | F10B | 107.5(8)  | C103 | O102 | C101 | 114.8(4)  |
| F12B | C6B | C5B  | 110.5(11) | O102 | C103 | C104 | 110.5(4)  |
| F12B | C6B | F10B | 106.8(11) | O105 | C104 | C103 | 111.2(4)  |
| F12B | C6B | F11B | 108.8(12) | C106 | O105 | C104 | 115.0(3)  |
| F13B | C7B | C5B  | 107.7(8)  | O105 | C106 | C107 | 110.8(4)  |
| F14B | C7B | C5B  | 110.2(13) | O108 | C107 | C106 | 111.5(4)  |
| F14B | C7B | F13B | 110.1(13) | C109 | O108 | C107 | 115.2(3)  |
| F15B | C7B | C5B  | 109.6(7)  | O108 | C109 | C110 | 111.8(3)  |
| F15B | C7B | F13B | 106.8(9)  | O111 | C110 | C109 | 112.4(4)  |
| F15B | C7B | F14B | 112.3(13) | C112 | O111 | C110 | 115.0(3)  |
| F16B | C8B | C5B  | 111.2(8)  | O111 | C112 | C113 | 111.3(3)  |
| F16B | C8B | F17B | 109.3(12) | O114 | C113 | C112 | 110.5(3)  |
| F16B | C8B | F18B | 108.2(9)  | C113 | O114 | C115 | 113.6(3)  |
| F17B | C8B | C5B  | 111.5(11) | O114 | C115 | C116 | 110.8(4)  |
| F18B | C8B | C5B  | 111.8(8)  | O117 | C116 | C115 | 111.7(3)  |
| F18B | C8B | F17B | 104.6(11) | C116 | O117 | C118 | 115.0(3)  |
| C9   | O3  | A11  | 146.6(2)  | O117 | C118 | C101 | 110.5(4)  |



|     |     |     |          |      |      |      |           |
|-----|-----|-----|----------|------|------|------|-----------|
| O3  | C9  | C10 | 110.3(3) | O202 | C201 | C218 | 109.3(4)  |
| O3  | C9  | C11 | 110.3(3) | C201 | O202 | C203 | 113.4(4)  |
| O3  | C9  | C12 | 108.3(3) | O202 | C203 | C204 | 109.9(4)  |
| C10 | C9  | C11 | 109.5(3) | O205 | C204 | C203 | 109.0(4)  |
| C12 | C9  | C10 | 109.2(3) | C206 | O205 | C204 | 113.1(4)  |
| C12 | C9  | C11 | 109.2(3) | O205 | C206 | C207 | 109.7(5)  |
| F19 | C10 | C9  | 112.4(3) | O208 | C207 | C206 | 109.1(4)  |
| F20 | C10 | C9  | 111.0(3) | C207 | O208 | C209 | 112.7(4)  |
| F20 | C10 | F19 | 108.3(3) | O208 | C209 | C210 | 109.0(4)  |
| F21 | C10 | C9  | 110.3(3) | O211 | C210 | C209 | 109.3(5)  |
| F21 | C10 | F19 | 107.0(3) | C212 | O211 | C210 | 112.8(4)  |
| F21 | C10 | F20 | 107.6(3) | O211 | C212 | C213 | 109.6(5)  |
| F22 | C11 | C9  | 112.6(3) | O214 | C213 | C212 | 109.5(8)  |
| F22 | C11 | F23 | 106.9(3) | C213 | O214 | C215 | 113.8(6)  |
| F23 | C11 | C9  | 111.4(3) | O214 | C215 | C216 | 108.7(5)  |
| F24 | C11 | C9  | 110.8(3) | O217 | C216 | C215 | 109.0(4)  |
| F24 | C11 | F22 | 107.4(3) | C218 | O217 | C216 | 113.5(4)  |
| F24 | C11 | F23 | 107.5(3) | O217 | C218 | C201 | 109.6(4)  |
| F25 | C12 | C9  | 110.7(3) | O402 | C401 | C418 | 110.0(16) |
| F25 | C12 | F26 | 107.4(3) | C401 | O402 | C403 | 115.3(13) |
| F26 | C12 | C9  | 111.8(3) | O402 | C403 | C404 | 112.6(16) |
| F27 | C12 | C9  | 111.2(3) | O405 | C404 | C403 | 111.8(17) |
| F27 | C12 | F25 | 107.8(4) | C406 | O405 | C404 | 113.3(13) |
| F27 | C12 | F26 | 107.7(3) | O405 | C406 | C407 | 108.8(16) |
| C13 | O4  | A11 | 147.4(3) | O408 | C407 | C406 | 109.2(15) |
| O4  | C13 | C14 | 111.5(3) | C409 | O408 | C407 | 113.0(13) |
| O4  | C13 | C15 | 108.3(3) | O408 | C409 | C410 | 109.8(15) |
| O4  | C13 | C16 | 109.0(3) | O411 | C410 | C409 | 110.7(17) |
| C14 | C13 | C15 | 110.6(3) | C410 | O411 | C412 | 113.2(15) |
| C14 | C13 | C16 | 108.5(3) | O411 | C412 | C413 | 108.9(19) |
| C15 | C13 | C16 | 108.9(3) | O414 | C413 | C412 | 114(2)    |
| F28 | C14 | C13 | 112.2(4) | C413 | O414 | C415 | 113.8(14) |
| F28 | C14 | F29 | 108.3(4) | O414 | C415 | C416 | 110.9(16) |
| F28 | C14 | F30 | 107.2(4) | O417 | C416 | C415 | 109.4(16) |
| F29 | C14 | C13 | 110.2(3) | C418 | O417 | C416 | 113.9(13) |
| F29 | C14 | F30 | 107.1(4) | O417 | C418 | C401 | 109.9(16) |
| F30 | C14 | C13 | 111.7(3) | F901 | C901 | C902 | 117.0(4)  |
| F31 | C15 | C13 | 109.6(3) | F901 | C901 | C906 | 123.0(4)  |
| F31 | C15 | F32 | 107.5(3) | C902 | C901 | C906 | 120.0     |
| F32 | C15 | C13 | 112.1(3) | C903 | C902 | C901 | 120.0     |
| F33 | C15 | C13 | 111.7(3) | C902 | C903 | C904 | 120.0     |
| F33 | C15 | F31 | 108.0(4) | C905 | C904 | C903 | 120.0     |

|     |     |      |           |      |      |      |           |
|-----|-----|------|-----------|------|------|------|-----------|
| F33 | C15 | F32  | 107.8(3)  | C906 | C905 | C904 | 120.0     |
| F34 | C16 | C13  | 111.9(4)  | C905 | C906 | C901 | 120.0     |
| F35 | C16 | C13  | 110.4(3)  | F971 | C971 | C972 | 131.8(14) |
| F35 | C16 | F34  | 107.2(4)  | F971 | C971 | C976 | 108.0(14) |
| F36 | C16 | C13  | 110.7(3)  | C972 | C971 | C976 | 120.0     |
| F36 | C16 | F34  | 108.2(4)  | C971 | C972 | C973 | 120.0     |
| F36 | C16 | F35  | 108.3(4)  | C972 | C973 | C974 | 120.0     |
| C1A | O1A | A11A | 142.7(7)  | C975 | C974 | C973 | 120.0     |
| O1A | C1A | C2A  | 114.9(6)  | C974 | C975 | C976 | 120.0     |
| O1A | C1A | C3A  | 106.7(8)  | C975 | C976 | C971 | 120.0     |
| O1A | C1A | C4A  | 107.6(7)  | F911 | C911 | C912 | 121.1(4)  |
| C2A | C1A | C3A  | 109.6(6)  | F911 | C911 | C916 | 118.9(4)  |
| C2A | C1A | C4A  | 108.4(6)  | C912 | C911 | C916 | 120.0     |
| C3A | C1A | C4A  | 109.5(6)  | C911 | C912 | C913 | 120.0     |
| F1A | C2A | C1A  | 111.5(6)  | C912 | C913 | C914 | 120.0     |
| F1A | C2A | F2A  | 106.2(5)  | C915 | C914 | C913 | 120.0     |
| F2A | C2A | C1A  | 113.3(5)  | C914 | C915 | C916 | 120.0     |
| F3A | C2A | C1A  | 111.8(5)  | C915 | C916 | C911 | 120.0     |
| F3A | C2A | F1A  | 105.0(5)  | F961 | C961 | C962 | 120.0(8)  |
| F3A | C2A | F2A  | 108.5(6)  | F961 | C961 | C966 | 120.0(8)  |
| F4A | C3A | C1A  | 110.6(6)  | C962 | C961 | C966 | 120.0     |
| F4A | C3A | F5A  | 108.9(7)  | C961 | C962 | C963 | 120.0     |
| F5A | C3A | C1A  | 111.4(6)  | C964 | C963 | C962 | 120.0     |
| F6A | C3A | C1A  | 111.6(6)  | C965 | C964 | C963 | 120.0     |
| F6A | C3A | F4A  | 107.9(7)  | C964 | C965 | C966 | 120.0     |
| F6A | C3A | F5A  | 106.3(7)  | C965 | C966 | C961 | 120.0     |
| F7A | C4A | C1A  | 111.5(6)  | F921 | C921 | C922 | 122.2(5)  |
| F7A | C4A | F8A  | 110.8(7)  | F921 | C921 | C926 | 117.8(5)  |
| F8A | C4A | C1A  | 109.5(6)  | C922 | C921 | C926 | 120.0     |
| F9A | C4A | C1A  | 109.5(6)  | C923 | C922 | C921 | 120.0     |
| F9A | C4A | F7A  | 108.7(6)  | C922 | C923 | C924 | 120.0     |
| F9A | C4A | F8A  | 106.8(7)  | C925 | C924 | C923 | 120.0     |
| C1C | O1C | A11A | 157.4(17) | C924 | C925 | C926 | 120.0     |
| O1C | C1C | C2C  | 108.6(12) | C925 | C926 | C921 | 120.0     |
| O1C | C1C | C3C  | 108.1(12) | C982 | C981 | F981 | 119.7(8)  |
| O1C | C1C | C4C  | 114.0(12) | C982 | C981 | C986 | 120.0     |
| C2C | C1C | C4C  | 109.0(8)  | C986 | C981 | F981 | 120.2(8)  |
| C3C | C1C | C2C  | 108.7(9)  | C981 | C982 | C983 | 120.0     |
| C3C | C1C | C4C  | 108.4(8)  | C982 | C983 | C984 | 120.0     |
| F1C | C2C | C1C  | 112.0(8)  | C985 | C984 | C983 | 120.0     |
| F2C | C2C | C1C  | 113.2(9)  | C984 | C985 | C986 | 120.0     |
| F2C | C2C | F1C  | 107.8(9)  | C985 | C986 | C981 | 120.0     |

|     |     |      |           |                   |      |                   |          |
|-----|-----|------|-----------|-------------------|------|-------------------|----------|
| F3C | C2C | C1C  | 115.2(9)  | F931              | C931 | C932              | 118.2(6) |
| F3C | C2C | F1C  | 102.4(9)  | F931              | C931 | C936              | 121.8(6) |
| F3C | C2C | F2C  | 105.3(9)  | C932              | C931 | C936              | 120.0    |
| F4C | C3C | C1C  | 110.5(9)  | C933              | C932 | C931              | 120.0    |
| F4C | C3C | F5C  | 108.9(10) | C932              | C933 | C934              | 120.0    |
| F5C | C3C | C1C  | 113.7(9)  | C933              | C934 | C935              | 120.0    |
| F6C | C3C | C1C  | 111.1(9)  | C936              | C935 | C934              | 120.0    |
| F6C | C3C | F4C  | 106.6(11) | C935              | C936 | C931              | 120.0    |
| F6C | C3C | F5C  | 105.8(11) | C952              | C951 | F951              | 118.6(8) |
| F7C | C4C | C1C  | 113.1(8)  | C952              | C951 | C956              | 120.0    |
| F7C | C4C | F9C  | 109.1(9)  | C956              | C951 | F951              | 121.4(8) |
| F8C | C4C | C1C  | 111.3(8)  | C953              | C952 | C951              | 120.0    |
| F8C | C4C | F7C  | 108.3(9)  | C952              | C953 | C954              | 120.0    |
| F8C | C4C | F9C  | 104.0(9)  | C953              | C954 | C955              | 120.0    |
| F9C | C4C | C1C  | 110.6(8)  | C954              | C955 | C956              | 120.0    |
| C5A | O2A | A11A | 150.5(3)  | C955              | C956 | C951              | 120.0    |
| O2A | C5A | C6A  | 110.3(3)  | C944 <sup>1</sup> | C942 | C943              | 119.1(5) |
| O2A | C5A | C7A  | 108.3(3)  | C942              | C943 | C944              | 119.4(5) |
| O2A | C5A | C8A  | 111.3(3)  | C942 <sup>1</sup> | C944 | C943              | 121.5(5) |
| C6A | C5A | C7A  | 109.7(4)  | F941              | C944 | C942 <sup>1</sup> | 118.4(6) |
| C8A | C5A | C6A  | 108.2(3)  | F941              | C944 | C943              | 120.1(6) |

### 2.2.6. Hydrogen Atom Coordinates and Isotropic Displacement Parameters

| Atom | x    | y    | z    | U(eq) |
|------|------|------|------|-------|
| H10A | 7380 | 1096 | 1236 | 61    |
| H10B | 8136 | 1408 | 1373 | 61    |
| H10C | 8123 | 793  | 1978 | 59    |
| H10D | 7375 | 424  | 1863 | 59    |
| H10E | 7599 | 576  | 2512 | 58    |
| H10F | 7712 | 1564 | 2458 | 58    |
| H10G | 6775 | 1822 | 2832 | 55    |
| H10H | 6661 | 831  | 2872 | 55    |
| H10I | 5560 | 966  | 2567 | 52    |
| H10J | 5653 | 1523 | 2943 | 52    |
| H10K | 4768 | 2454 | 2705 | 48    |
| H10L | 4641 | 1910 | 2327 | 48    |
| H11A | 4260 | 3273 | 2228 | 45    |
| H11B | 5007 | 3622 | 2358 | 45    |
| H11C | 5022 | 4283 | 1755 | 37    |
| H11D | 4279 | 3918 | 1625 | 37    |
| H11E | 4714 | 3188 | 1132 | 45    |
| H11F | 4844 | 4177 | 1098 | 45    |

|      |      |       |      |    |
|------|------|-------|------|----|
| H11G | 5787 | 3945  | 750  | 45 |
| H11H | 5660 | 2952  | 768  | 45 |
| H11I | 6787 | 3245  | 675  | 47 |
| H11J | 6875 | 3768  | 1060 | 47 |
| H11K | 7786 | 2799  | 1289 | 54 |
| H11L | 7663 | 2281  | 903  | 54 |
| H20A | 1735 | 9320  | 132  | 45 |
| H20B | 1437 | 10028 | 389  | 45 |
| H20C | 2609 | 10258 | 629  | 45 |
| H20D | 2887 | 9458  | 419  | 45 |
| H20E | 3581 | 9805  | 983  | 48 |
| H20F | 2950 | 9593  | 1217 | 48 |
| H20G | 3593 | 8437  | 1530 | 49 |
| H20H | 4217 | 8704  | 1301 | 49 |
| H20I | 4155 | 7359  | 1009 | 54 |
| H20J | 4359 | 7312  | 1455 | 54 |
| H20K | 3900 | 5915  | 1482 | 50 |
| H20L | 3725 | 5943  | 1032 | 50 |
| H21A | 3015 | 4987  | 1324 | 49 |
| H21B | 2718 | 5762  | 1544 | 49 |
| H21C | 1595 | 5520  | 1231 | 49 |
| H21D | 1895 | 4724  | 1027 | 49 |
| H21E | 1579 | 5359  | 434  | 53 |
| H21F | 929  | 5186  | 659  | 53 |
| H21G | 359  | 6240  | 288  | 47 |
| H21H | 1003 | 6577  | 93   | 47 |
| H21I | 169  | 7641  | 168  | 44 |
| H21J | 345  | 7553  | 616  | 44 |
| H21K | 784  | 8977  | 662  | 46 |
| H21L | 572  | 9076  | 218  | 46 |
| H40A | 2534 | 9501  | 340  | 45 |
| H40B | 2438 | 10239 | 637  | 45 |
| H40C | 3529 | 9813  | 963  | 45 |
| H40D | 3585 | 9041  | 681  | 45 |
| H40E | 4212 | 8819  | 1258 | 48 |
| H40F | 3528 | 8879  | 1462 | 48 |
| H40G | 3605 | 7440  | 1687 | 49 |
| H40H | 4344 | 7465  | 1537 | 49 |
| H40I | 3981 | 6351  | 1113 | 54 |
| H40J | 4032 | 6080  | 1548 | 54 |
| H40K | 3155 | 4995  | 1394 | 50 |
| H40L | 3191 | 5273  | 965  | 50 |

|      |      |      |      |    |
|------|------|------|------|----|
| H41A | 2144 | 4633 | 1057 | 49 |
| H41B | 1996 | 5379 | 1339 | 49 |
| H41C | 995  | 5499 | 890  | 49 |
| H41D | 1267 | 4937 | 563  | 49 |
| H41E | 1283 | 6103 | 176  | 53 |
| H41F | 535  | 5970 | 300  | 53 |
| H41G | 216  | 7413 | 208  | 47 |
| H41H | 921  | 7495 | 25   | 47 |
| H41I | 518  | 8798 | 240  | 44 |
| H41J | 625  | 8439 | 663  | 44 |
| H41K | 1443 | 9566 | 797  | 46 |
| H41L | 1380 | 9859 | 365  | 46 |
| H902 | 4330 | 1332 | 1266 | 41 |
| H903 | 4579 | 439  | 1783 | 45 |
| H904 | 5585 | -348 | 1839 | 48 |
| H905 | 6342 | -242 | 1378 | 43 |
| H906 | 6093 | 651  | 861  | 37 |
| H972 | 4808 | 1530 | 881  | 41 |
| H973 | 4262 | 1275 | 1422 | 45 |
| H974 | 4727 | 316  | 1874 | 48 |
| H975 | 5738 | -389 | 1786 | 43 |
| H976 | 6284 | -135 | 1246 | 37 |
| H912 | 8260 | 3794 | 2048 | 47 |
| H913 | 7169 | 4048 | 1747 | 47 |
| H914 | 6228 | 4051 | 2095 | 49 |
| H915 | 6378 | 3802 | 2745 | 49 |
| H916 | 7468 | 3548 | 3046 | 42 |
| H962 | 7529 | 3454 | 3012 | 47 |
| H963 | 8412 | 3232 | 2633 | 47 |
| H964 | 8235 | 3493 | 1985 | 49 |
| H965 | 7175 | 3975 | 1716 | 49 |
| H966 | 6292 | 4196 | 2094 | 42 |
| H922 | 459  | 8402 | 1357 | 63 |
| H923 | 1363 | 9326 | 1520 | 67 |
| H924 | 2363 | 8836 | 1859 | 54 |
| H925 | 2459 | 7421 | 2035 | 43 |
| H926 | 1555 | 6497 | 1872 | 40 |
| H982 | 1390 | 9386 | 1526 | 63 |
| H983 | 2371 | 8985 | 1908 | 67 |
| H984 | 2505 | 7592 | 2112 | 54 |
| H985 | 1658 | 6601 | 1934 | 43 |
| H986 | 676  | 7002 | 1552 | 40 |

|      |      |      |      |    |
|------|------|------|------|----|
| H932 | 2169 | 7687 | -59  | 71 |
| H933 | 2492 | 6399 | 220  | 77 |
| H934 | 3644 | 6036 | 321  | 84 |
| H935 | 4474 | 6960 | 142  | 85 |
| H936 | 4152 | 8248 | -138 | 73 |
| H952 | 2813 | 6100 | 238  | 71 |
| H953 | 2081 | 7166 | -7   | 77 |
| H954 | 2529 | 8440 | -198 | 84 |
| H955 | 3708 | 8646 | -143 | 85 |
| H956 | 4440 | 7580 | 102  | 73 |
| H942 | 6064 | -284 | -201 | 62 |
| H943 | 5729 | -951 | 331  | 60 |
| H944 | 4658 | -683 | 518  | 60 |

- [1] I. Krossing, *Chemistry – A European Journal* **2001**, *7*, 490.  
[2] A. J. Lehner, N. Trapp, H. Scherer, I. Krossing, *Dalton Transactions* **2011**, *40*, 1448.
